# Investigating the conformational response of the Sortilin receptor upon binding endogenous peptide- and protein ligands by HDX-MS

Esben Trabjerg<sup>1,2</sup>, Nadia Abu-Asad<sup>1</sup>, Ziqian Wan<sup>1</sup>, Fredrik Kartberg<sup>2</sup>, Søren Christensen<sup>2</sup> and Kasper D. Rand<sup>1\*</sup>

<sup>1</sup>Protein Analysis Group, Department of Pharmacy, University of Copenhagen, Copenhagen, Denmark

<sup>2</sup>Biotherapeutic Discovery, H. Lundbeck A/S, Ottiliavej 9, Valby, Denmark

\*To whom correspondence should be addressed.

## Abstract

Sortilin is a multifunctional transmembrane neuronal receptor involved in sorting of neurotrophic factors and apoptosis signalling. So far, structural characterization of Sortilin and its endogenous ligands has been limited to crystallographic studies of Sortilin in complex with the neuropeptide Neurotensin. Here, we use hydrogen/deuterium exchange mass spectrometry to investigate the conformational response of Sortilin to binding biological ligands including the peptides Neurotensin and the Sortilin propeptide and the proteins Progranulin and pro-Nerve growth factor- $\beta$ . The results show that the ligands employ two binding sites inside the cavity of the  $\beta$ -propeller of Sortilin. However, ligands have distinct differences in their conformational impact on the receptor. Interestingly, the protein ligands induce conformational stabilization in a remote membrane-proximal domain, hinting at an unknown conformational link between the ligand binding region and this membrane-proximal region of Sortilin. Our findings improves our molecular understanding of Sortilin and how it mediates diverse ligand-dependent functions important in neurobiology.

## Introduction

The Sortilin receptor, also known as the Neurotensin receptor-3, is a multifunctional transmembrane receptor that predominantly is expressed in the central and peripheral nerve system, where it is involved in endocytosis and sorting of neurotrophic factors and apoptosis signalling (Nykjaer & Willnow, 2012). Sortilin was discovered in a biochemical screen for orphan endocytic receptors in the human brain and simultaneously described as a receptor for the neuropeptide Neurotensin (NT) (Mazella et al., 1998; C. M. Petersen et al., 1997; Zsürger, Mazella, & Vincent, 1994). The receptor consist of an N-terminal extracellular domain, a single transmembrane helix and a cytoplasmic tail. To date, four other human protein homologues have been identified; SorLA, SorCS1, SorCS2 and SorCS3 (Nielsen et al., 2001; Nykjaer & Willnow, 2012).

Sortilin is expressed in a pro-form and its 44 residue propeptide is thought to serve at least two purposes. Firstly, as an intrinsic chaperone to facilitate the correct folding of the extracellular part. Secondly, to inhibit the interaction of Sortilin with its endogenous ligands until final maturation of the

38 receptor by the protease Furin in the Golgi compartment (Nykjaer & Willnow, 2012; C. Munck  
39 Petersen et al., 1999; Quistgaard et al., 2009; Westergaard et al., 2004).

40 X-ray crystal structures of the extracellular domain of Sortilin in complex with NT and small  
41 molecule NT binding inhibitors have been solved (J.L. Andersen et al., 2017; Jacob Lauwring Andersen  
42 et al., 2014; Quistgaard et al., 2014, 2009; Schrøder et al., 2014). The extracellular part of Sortilin  
43 adopts a donut-shaped fold, where the N-terminal domain forms an oval 10-bladed  $\beta$ -propeller with  
44 a slightly conical cavity, flanked by two minor cysteine-rich domains termed the 10CC-a and 10CC-b  
45 domains (**Fig. 1a**) (Quistgaard et al., 2009). The primary interaction site of NT was revealed in the first  
46 published crystal structure of Sortilin, where the four C-terminal residues of NT form a  $\beta$ -strand  
47 extension to strand 1 of blade 6 inside the tunnel of the  $\beta$ -propeller (**Fig. 1a**). Furthermore,  
48 hydrophobic and polar interactions with surrounding residues and the formation of a salt bridge  
49 between the C-terminal carboxylate of NT and the side chain of Arg292 constitutes the interaction  
50 interface of Sortilin and the C-terminal of NT. This interaction site has been referred to as NT  
51 interaction site 1 (NTIS1) (Quistgaard et al., 2014). Later, a second crystal structure of Sortilin in  
52 complex with NT at elevated concentration (15 times molar excess) was published (Quistgaard et al.,  
53 2014). Here, further electron density for a five-residue peptide backbone was observed on the  
54 opposite side of the  $\beta$ -propeller cavity forming a short  $\beta$ -strand extension to strand 1 of blade 1 (**Fig.**  
55 **1a**). Supported by biochemical binding data of NT and fragments thereof, the authors proposed NT  
56 binding to Sortilin to be a 1:1 interaction and that the electron density found on the opposing side of  
57 NTIS1 inside the  $\beta$ -propeller cavity represented the N-terminal of NT (Quistgaard et al., 2014). This  
58 putative interaction site has been referred to as NT interaction site 2 (NTIS2) (Quistgaard et al., 2014).

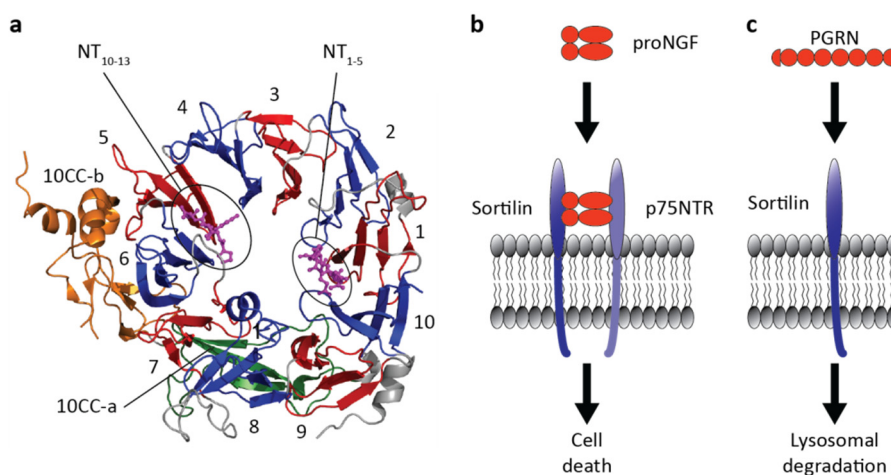

59

60 **Figure 1. The multifunctional Sortilin receptor.** (a) Crystal structure of Sortilin in complex with NT (PDB ID: 4PO7). The 10  
61 blades forming the  $\beta$ -propeller are colored blue and red, while the the 10CC domains (a and b) are colored green and orange,  
62 respectively. NT is colored magenta, and NTIS1 is shown occupied by NT<sub>10-13</sub> and the tentative NTIS2 is shown occupied by  
63 NT<sub>1-5</sub>. (b) proNGF induces apoptosis of neurons by interacting with a receptor complex of Sortilin and p75NTR. (c) Sortilin  
64 mediates endocytosis of PGRN and directs it for lysosomal degradation. The interaction of Sortilin with both proNGF and  
65 PGRN have been proposed as drug targets for treating various conditions of neurodegenerative diseases.

66 NT and the propeptide of Sortilin are only two out of many biologically relevant Sortilin ligands that  
67 include Proneurotrophins (Nykjaer, Lee, Teng, & Jansen, 2004; Teng et al., 2005), Progranulin (PGRN)  
68 (Hu et al., 2010), Lipoprotein Lipase (Nielsen, Jacobsen, Olivecrona, Gliemann, & Petersen, 1999), Apo  
69 Lipoproteins (Carlo et al., 2013; Nielsen et al., 1999), Amyloid Precursor Protein (Gustafsen et al.,  
70 2013), A $\beta$  (Carlo et al., 2013) and the receptor associated protein (C. M. Petersen et al., 1997). Lately,  
71 the interaction of Sortilin with both the pro-form of Nerve growth factor- $\beta$  (proNGF) and PGRN has  
72 received increased attention as these interactions have been proposed as putative drug targets for

73 treating neurodegenerative diseases (**Fig. 1b,c**) (Kao, McKay, Singh, Brunet, & Huang, 2017; Lee et al.,  
74 2014; Nykjaer & Willnow, 2012).

75 proNGF is a dimer at native conditions with a well-defined mature part and a largely disordered  
76 pro-part consisting of 103 residues (Feng et al., 2010; Esben Trabjerg, Kartberg, Christensen, & Rand,  
77 2017). proNGF induces apoptosis of neurons by binding to a receptor complex consisting of Sortilin  
78 and the common neurotrophine receptor (p75NTR) (**Fig. 1b**) (Nykjaer et al., 2004). Furthermore,  
79 increased levels of proNGF have been associated with pathological conditions where apoptosis of  
80 neurons are prevalent, e.g. Alzheimer's disease, Multiple sclerosis, ischemic stroke and seizure  
81 (Beattie et al., 2002; Fahnstock, Michalski, Xu, & Coughlin, 2001; Jansen et al., 2007; Lowry et al.,  
82 2001; Perez et al., 2015).

83 PGRN is an extracellular secreted glycoprotein consisting of seven and a half tandem repeats of a  
84 conserved granulin fold (Bhandari, Palfree, & Bateman, 1992). The full-length structure of PGRN is  
85 unknown, but the structure of several individual granulins has been determined by nuclear magnetic  
86 resonance spectroscopy (Hrabal, Chen, James, Bennett, & Ni, 1996; Tolkatchev et al., 2008). An  
87 absence of PGRN has been linked to neurodegeneration as mutations causing PGRN deficiency results  
88 in frontotemporal dementia (Baker et al., 2006). The bona fide receptor that transduce the  
89 neurotrophic PGRN signals is still elusive, but extracellular supplementation of PGRN to PGRN-  
90 knockdown neuronal cultures has been shown to rescue neurite outgrowth (Gass et al., 2012; Kao et  
91 al., 2017). In contrast, PGRN has been shown to bind Sortilin, which targets PGRN for endocytosis and  
92 lysosomal degradation. Hence, a inhibition of this interaction has been proposed as a strategy for  
93 treating frontotemporal dementia (**Fig. 1c**) (Kao et al., 2017; Lee et al., 2014).

94 Insights into the conformation and dynamics of unbound Sortilin and how Sortilin binds to larger  
95 endogenous protein ligands is currently lacking. In this study we have investigated the molecular  
96 interactions of Sortilin and both small and large binding partners (NT, the Sortilin propeptide, proNGF  
97 and PGRN) by hydrogen/deuterium exchange followed by mass spectrometry (HDX-MS). HDX-MS  
98 represents a sensitive analytical approach to probe the conformational dynamics of proteins and how  
99 these change upon ligand binding. The technique can provide access to large and challenging protein  
100 systems at native solution-phase conditions with very little sample consumption (Hvidt & Linderstrom-  
101 Lang, 1955; Hvidt & Linderstrøm-Lang, 1954; Hvidt & Nielsen, 1966; Jensen & Rand, 2016; Konermann,  
102 Pan, & Liu, 2011; Esben Trabjerg, Nazari, & Rand, 2018; Wales & Engen, 2006). During an HDX-MS  
103 experiment the exchange rate of backbone amide hydrogens is measured, which is primarily  
104 dependent on the presence and stability of local hydrogen bonding (McAllister & Konermann, 2015;  
105 Persson & Halle, 2015; Skinner, Lim, Bédard, Black, & Englander, 2012a, 2012b). Hence, the exchange  
106 rate is highly informative on protein higher-order structure and can vary up to eight orders of  
107 magnitude, when comparing backbone amides in disordered regions (non-hydrogen bonded) to  
108 backbone amides in heavily structured regions (e.g. stable  $\alpha$ -helices or  $\beta$ -sheets) (Englander &  
109 Kallenbach, 1983). HDX-MS is thus very suitable for detecting subtle changes in protein conformation  
110 and dynamics caused by changes to the solution environment or due to specific molecular interactions  
111 (Leurs et al., 2014; Morgan & Engen, 2009).

112 Our HDX-MS results indicate that Sortilin employs two binding surfaces in the cavity of the  $\beta$ -  
113 propeller to bind its diverse biological ligands. The conformational imprint of each ligand on the  
114 receptor, however, has unique features, and in the case of proNGF and PGRN further involves the  
115 remote 10CC domains. The observed distinct changes in dynamics of Sortilin upon ligand binding could  
116 be important for function and in mediating diverse biological downstream signalling.

117

## 118 Results

### 119 Conformational dynamics of the unbound Sortilin Receptor

120 The extracellular ligand-binding domain of Sortilin accounts for 89% of the total sequence of the  
 121 receptor and is a highly glycosylated and disulfide-bonded domain, with six N-linked glycosylation sites  
 122 and a total of eight disulfide bonds (C. M. Petersen et al., 1997; C. Munck Petersen et al., 1999). HDX-  
 123 MS analysis of Sortilin was performed with an effective sequence coverage of 96% of the extracellular  
 124 domain of Sortilin domain following significant optimization of conditions for protein digestion  
 125 (quench buffers) as well as identification of glycopeptides from a glycan analysis of the protein  
 126 (**Supplementary Table 1** and **Supplementary Fig. 1**).

127 Solution-phase HDX of unbound Sortilin revealed both well-defined structural segments and  
 128 highly dynamic regions. In general, the backbone amides in the strands of each  $\beta$ -blade of the  $\beta$ -  
 129 propeller structure of Sortilin incorporated deuterium slowly, while loops connecting the single  $\beta$ -  
 130 blades exhibited faster deuterium uptake, in good overall correlation to the ligand-bound crystal  
 131 structure (**Supplementary Fig. 2** and **Supplementary HDX plots**). One striking discrepancy between  
 132 the crystal structure of ligand-bound Sortilin and the solution-phase dynamics of unbound Sortilin was  
 133 observed in the three C-terminal  $\alpha$ -helices (residues 664-671, 673-678 and 702-709) of the crystal  
 134 structure. These segments exhibited fast HDX kinetics with nearly full deuterium incorporation already  
 135 after 15 seconds (**Supplementary Fig. 2** and **Supplementary HDX plots**). This is highly unusual for  
 136 secondary structure elements, where a protection from HDX caused by the presence of hydrogen  
 137 bonds is normally observed. Hence, our results strongly suggest that the three C-terminal  $\alpha$ -helices  
 138 are highly dynamic or unstructured in solution.

139

### 140 Conformational impact of Neurotensin binding

141 The neurotransmitter NT was the first identified peptide ligand of Sortilin. To investigate the  
 142 conformational response of Sortilin to NT binding, we measured the HDX of Sortilin in presence and  
 143 absence of NT. Upon ligation with NT, a decrease in HDX was observed in peptides covering a large  
 144 area in and around NTIS1 (**Fig. 2** and **Supplementary HDX plots**).

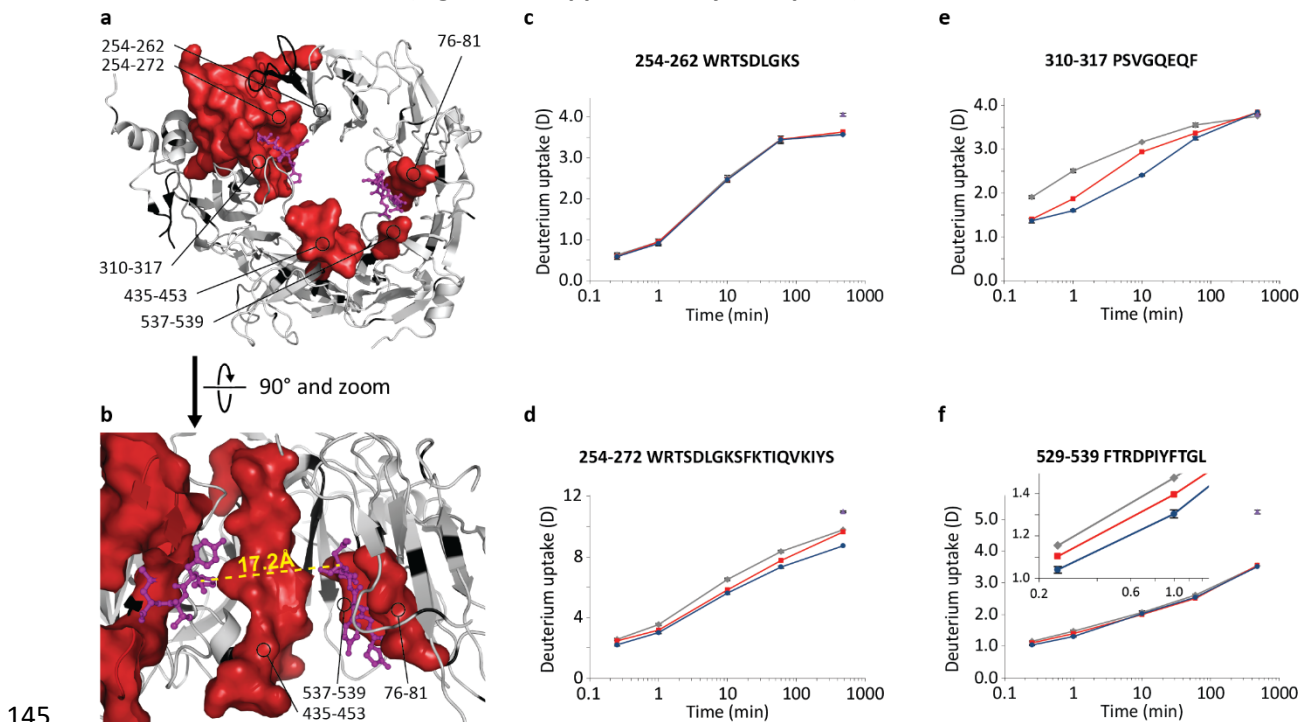



146 **Figure 2. Mapping the conformational stabilization of Sortilin upon NT binding.** (a,b) Differential HDX results are mapped  
147 onto the crystal structure of Sortilin (PDB ID: 4PO7). Regions stabilized in the presence of NT are coloured red. Regions  
148 showing no change in HDX are coloured white, while regions without coverage are coloured black. The C- and N-terminal of  
149 NT are shown in magenta. The dashed yellow line in (b) marks the Euclidean distance on 17.2 Å between the C-α of Asn5 and  
150 Pro10 in NT. (c-f) HDX plots of selected peptides. Absolute deuterium incorporation is plotted as a function of time for Sortilin  
151 (grey lines), Sortilin in the presence of 1.5 times molar excess of NT (red lines) and Sortilin in presence of 15 times molar  
152 excess of NT (blue lines). Equilibrium labelled (90%) Sortilin control samples are plotted as filled purple triangles at the 8 h  
153 time point. SD is plotted as error bars (are only slightly visible). (For Sortilin and Sortilin in presence of 15 times molar excess  
154 of NT: n=3 for all time points and the equilibrium labelled sample, except the 8 h time point where n=1. For Sortilin in  
155 presence of 1.5 times molar excess of NT: n=1 for all time points).

156 The conformational impact of NT binding was not confined to residues in NTIS1, but also peptides  
157 spanning areas on the other side of the β-barrel cavity in the N-terminal end of β-blade 1 and in β-  
158 blade 10 (residues 76-81 and 537-539, respectively) showed a significant reduction in HDX in the  
159 presence of NT. This area overlaps with the proposed secondary interaction site of NT, where residues  
160 77-81 engage in hydrogens bonds with the N-terminal residues of NT. Residues 537-539 have not  
161 previously been implicated in NT binding, however they are in close proximity to the N-terminal of NT  
162 and specifically the backbone amide of Leu539 is in close proximity to the end of the side chain of Glu4  
163 of NT. Furthermore, locally confined reduction in HDX was observed on the top and inside the cavity  
164 of the β-propeller in the middle of blade 8 (residues 435-453) located between NTIS1 and the putative  
165 NTIS2, indicating a possible third interaction point between NT and Sortilin.

166 To further dissect the binding mode of NT we mapped the conformational response of Sortilin in  
167 the presence of a small molecule Sortilin inhibitor (AF38469) known to emulate the binding  
168 mechanism of the C-terminal part of NT (Schrøder et al., 2014). Here, a protection from HDX was  
169 observed exclusively for peptides spanning the core of NTIS1 (**Supplementary Fig. 3**) and even more  
170 outlying regions of NTIS1 that were perturbed by NT did not show reduced HDX upon AF38469 binding  
171 (residues 271-281 and 319-321).

172 NTIS2 was revealed in a crystal structure of Sortilin in the presence of 15-times molar excess of  
173 NT. This NT concentration is probably not physiologically relevant, so we performed a HDX experiment  
174 of Sortilin in the presence of either 1.5- or 15-times molar excess of NT directly corresponding to the  
175 two published crystal structures of the NT-Sortilin complex (**Fig. 2** and **Supplementary HDX plots**).  
176 Even at the lower NT concentration, reduced HDX could be observed in peptides spanning NTIS2 and  
177 in the middle of blade 8.

178

### 179 **Structural characterization of Sortilin in complex with its propeptide**

180 The propeptide of Sortilin is a 44-residue N-terminal extension that inhibits interactions between  
181 Sortilin and other binding partners. The propeptide is enzymatically cleaved off under maturation of  
182 the extracellular domain of Sortilin, hence a synthetic produced free form of the propeptide with an  
183 amidated C-terminal (proSort) was employed as a surrogate of the real N-terminal extension (Kitago  
184 et al., 2015; C. Munck Petersen et al., 1999).

185 The conformational impact of proSort binding to Sortilin was investigated by HDX-MS. Overall,  
186 Sortilin showed a reduction in HDX in the presence of the proSort in similar regions as upon ligation  
187 with NT (**Figs. 2** and **3**). However, while the magnitude of the observed reductions in HDX around  
188 NTIS1 were highly similar between NT and proSort, the magnitude of HDX reductions around NTIS2  
189 were substantially more pronounced upon proSort binding relative to NT binding (**Supplementary**  
190 **HDX plots**).

191 To further elucidate the binding mechanism of the propeptide the reciprocal HDX-MS experiment  
192 was performed, where the HDX of proSort was measured in the absence and presence of Sortilin (**Fig.**

193 **3b and Supplementary HDX plots**). In the absence of Sortilin, proSort exhibited HDX kinetics of a highly  
194 flexible unstructured polypeptide with no evidence of local higher-order structure as all regions of the  
195 peptide were fully deuterated already after 10 seconds of labelling. In the presence of Sortilin,  
196 however, a significant protection from HDX could be observed for peptides spanning the N-terminal  
197 half of proSort. These changes in HDX could be sub-localized to the segment encompassing residues  
198 11-26 as 1) no significant change in HDX was observed for peptide 26-44 and 2) the magnitude of  
199 protection from HDX in peptide 10-44 was equal to the difference observed in intact proSort  
200 (**Supplementary HDX plots**). Interestingly, the stabilized region (residues 11-26) encompass the region  
201 of proSort that is most prone to form  $\beta$ -amyloid aggregation as predicted by the PASTA server (**Fig. 3c**)  
202 (Walsh, Seno, Tosatto, & Trovato, 2014).

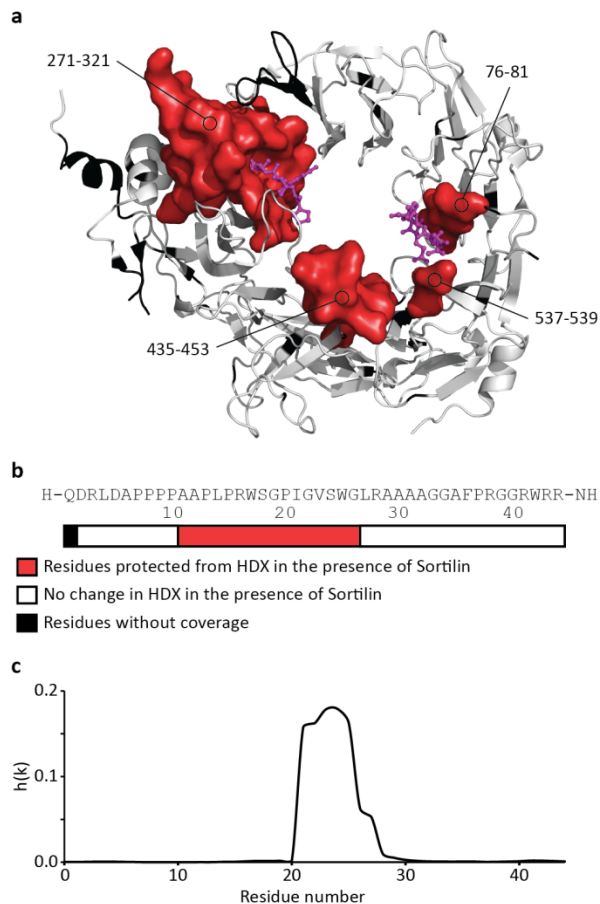

203 **Figure 3. Mapping the conformational binding interface in the Sortilin-proSort complex.** (a) Differential HDX results are  
204 mapped onto the crystal structure of Sortilin (PDB ID: 4PO7). Regions stabilized in the presence of proSort are coloured red.  
205 Regions showing no change in HDX are coloured white, while regions without coverage are coloured black. The C- and N-  
206 terminal of NT are shown in magenta. (b) The proSort sequence is shown and the bar below displays residues with reduced  
207 HDX in the presence of Sortilin (red) and unaffected residues (white). Regions without coverage are coloured black. (c)  
208 Prediction of  $\beta$ -aggregation of proSort by the PASTA server (<http://protein.bio.unipd.it/pasta2/>) (Walsh et al., 2014). The  
209 proSort sequence was submitted to the PASTA server, and the aggregation probability score ( $h(k)$ ) was plotted as a function  
210 of the proSort sequence.  
211

### 212 Mapping of the interaction sites of the Sortilin-proNGF complex

213 We next investigated the conformational response of Sortilin upon proNGF binding by HDX-MS. In the  
214 presence of proNGF A significant decrease in HDX could be observed in peptides of Sortilin spanning  
215 the C-terminal part of NTIS1 (residues 284-318). Compared to the NT and proSort, no protection from  
216 HDX was observed in NTIS2 or any other region inside the central cavity of the  $\beta$ -propeller  
217 architecture. In contrast, reduced HDX was observed in a cluster on the outer rim of the  $\beta$ -propeller

218 (residues 387-395, 429-433 and 455-466) (**Fig. 4**). Furthermore, a conformational stabilization was also  
219 observed in the 10CC-b domain (residues 683-699). Interestingly, this region is on the opposite face  
220 of the  $\beta$ -propeller as both NTIS1 and the stabilized region on the outer rim of the  $\beta$ -propeller.

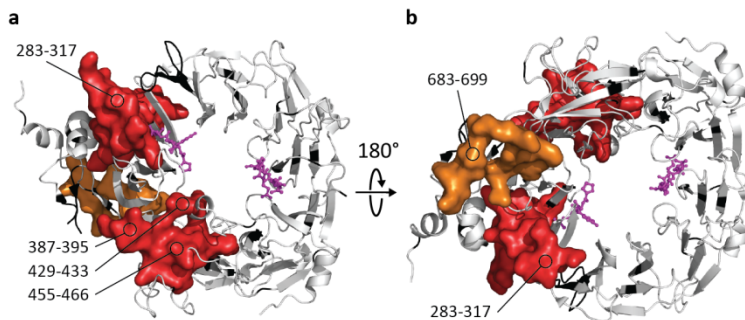

221  
222 **Figure 4. Mapping the conformational stabilization of Sortilin upon proNGF binding.** (a,b) Differential HDX results are  
223 mapped onto the crystal structure of Sortilin (PDB ID: 4PO7). Regions stabilized in the presence of proNGF are coloured red  
224 ( $\beta$ -propeller domain) and orange (10CC domains). Regions showing no change in HDX are coloured white, while regions  
225 without coverage are coloured black. The C- and N-terminal of NT are shown in magenta.

226 To further investigate the binding mode of proNGF to Sortilin, we mapped the conformational  
227 response of Sortilin upon binding of GSTpro, a protein construct where the pro-part of proNGF is N-  
228 terminally fused with Glutathione-S transferase (GSTpro), and which binds with similar affinity to  
229 Sortilin as proNGF (Nykjaer et al., 2004). GSTpro binding to Sortilin closely emulated the  
230 conformational response of Sortilin upon proNGF binding, as a decrease in HDX was observed in  
231 peptides spanning both NTIS1, the outer rim cluster of the  $\beta$ -propeller (residues 386-395, 428-434 and  
232 455-466) and in the 10CC domain (residues 682-699) (**Supplementary Fig. 4** and **Supplementary HDX**  
233 **plots**). As a control experiment, the HDX of Sortilin in the presence of Nerve growth factor- $\beta$  (the  
234 mature part of proNGF) and Glutathione-S transferase was also measured. In both cases, no significant  
235 changes in deuterium uptake could be detected (**Supplementary Fig. 4** and **Supplementary HDX**  
236 **plots**).

237 The conformational impact of Sortilin binding to proNGF and GSTpro was also investigated by  
238 measuring the HDX of both in the presence of a molar excess of Sortilin. However, no changes in HDX  
239 were observed in the pro-part of either proNGF or in GSTpro (data not shown).

240

#### 241 **Mapping of the interaction sites of the Sortilin-PGRN complex**

242 The conformational response of Sortilin to binding of PGRN was investigated by HDX-MS. The impact  
243 of PGRN binding shared similarities with NT and proSort binding but also significant differences (**Fig. 5**  
244 and **Supplementary HDX plots**). A significant reduction in HDX was detected for peptides in and  
245 around NTIS1. However, a larger area around NTIS1 was affected than seen for proSort and NT. The  
246 conformational response was not limited to NTIS1 as peptides in NTIS2 also showed a structural  
247 stabilization in the presence of PGRN. As seen for proSort the magnitude of the reduction in NTIS2  
248 was larger than seen for NT binding. Furthermore, a large surface on the outer rim of the  $\beta$ -barrel of  
249 Sortilin, showed a significant reduction in HDX (residues 362-370, 387-395, 435-453 and 455-466).  
250 Additionally, a reduction in HDX was observed in the 10CC-b domain (residues 641-644 and 683-695).  
251 Interestingly, structural stabilization was also observed in this region in presence of proNGF.

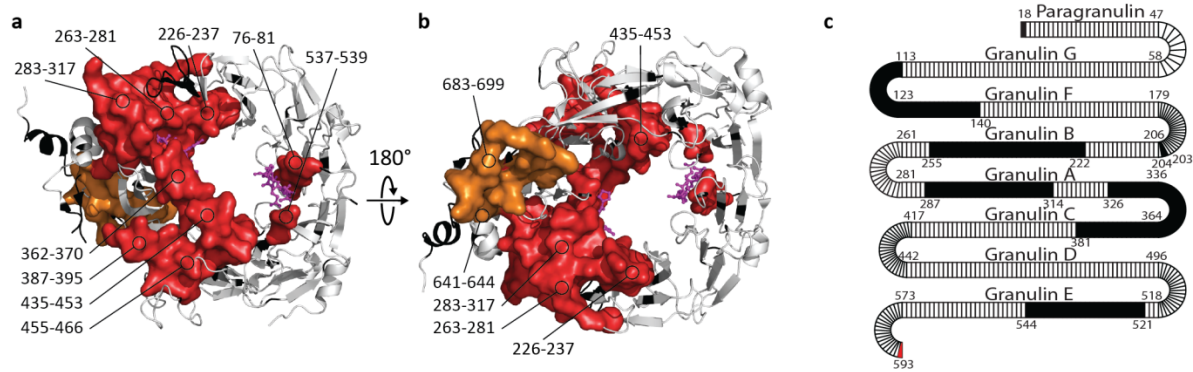

252  
253 **Figure 5. Mapping the conformational stabilization of Sortilin upon PGRN binding.** (a,b) Differential HDX results are mapped  
254 onto the crystal structure of Sortilin (PDB ID: 4PO7). Regions stabilized in the presence of PGRN are coloured red ( $\beta$ -propeller  
255 domain) and orange (10CC domains). Regions showing no change in HDX are coloured white, while regions without coverage  
256 are coloured black. The C- and N-terminal of NT are shown as sticks in magenta. (c) Differential HDX results are mapped onto  
257 a model representation of PGRN. Regions stabilized in the presence of Sortilin are coloured red, regions showing no change  
258 in HDX are coloured white, while regions without coverage are coloured black. Granulin domains (Paragranulin, G, F, B, A, C,  
259 D and E) are depicted as horizontal segments, while the connecting linker regions are represented as loops.

260 We also performed the reciprocal HDX-MS experiment, where the binding impact of Sortilin on PGRN  
261 was investigated. To obtain an adequate sequence coverage of PGRN, due to the presence of multiple  
262 highly stable disulfide bonds, on-line electrochemical reduction was applied during the HDX-MS  
263 workflow (**Supplementary Fig. 5**) (Mysling, Salbo, Ploug, & Jørgensen, 2014; Esben Trabjerg et al.,  
264 2015). To our knowledge this is the first time this approach has been employed to facilitate HDX-MS  
265 analysis of a large protein complex. Strikingly, the conformational impact of Sortilin on PGRN was  
266 restricted to the very last C-terminal residue, as only peptides spanning the last residue of PGRN  
267 showed a significant protection from exchange in presence of Sortilin (**Fig. 5c** and **Supplementary HDX**  
268 **plots**).

269

## 270 Discussion

### 271 Peptide ligands employ two distinct binding sites in the cavity of the $\beta$ -barrel of Sortilin

272 NT binding to Sortilin resulted in significant reductions in HDX for residues in both NTIS1 and NTIS2  
273 and a patch of residues on the top and inside the cavity of the  $\beta$ -propeller between NTIS1 and NTIS2  
274 (residues 435-453) (**Fig. 2**). The observed reduction in HDX in NTIS1 correlate very well with published  
275 crystal structures of the NT-Sortilin complex, as all residues forming either polar or Van der Waals  
276 contacts with NT showed reduced HDX and thus conformational stabilization in the presence of NT  
277 (Quistgaard et al., 2014, 2009).

278 The magnitude of the reduced HDX observed in NTIS2 are markedly less than the reductions in  
279 HDX observed in NTIS1, which could suggest that the observed reduction of HDX in NTIS2 represent  
280 an indirect effect of NT binding. From HDX data alone, it is not straightforward to discern whether a  
281 protection in HDX at a specific site is caused by a direct interaction between two binding partners or  
282 are an indirect effect of binding (allosteric) (Wales & Engen, 2006). However, the mapping of the  
283 conformational response of Sortilin to AF38469 showed that AF38469 binding to Sortilin only reduced  
284 HDX in residues of NTIS1 (**Supplementary Fig. 3**). Initially, NTIS2 was revealed in a crystal structure of  
285 Sortilin in the presence of 15-times molar excess of NT. The presented HDX results showed a reduction  
286 in HDX in NTIS2 even at 1.5-times molar excess of NT discarding the concern of crystallization artefacts  
287 (**Fig. 2** and **Supplementary HDX plots**) (Quistgaard et al., 2014). Our results thus strongly suggest that



288 the reduced HDX in NTIS2 upon NT binding is due to a direct interaction with the N-terminal of NT as  
289 proposed by Quistgaard et al.

290 Recently, a crystal structure of a Sortilin homologue (SorLA) in complex with fragments of peptide  
291 ligands has been published (Kitago et al., 2015). These ligands bind in a binding site similar to NTIS2,  
292 where the interaction between the peptide ligands and SorLA mainly is mediated by the peptide  
293 backbone (**Supplementary Fig. 6**). The reduced HDX observed in the cavity of the  $\beta$ -propeller in the  
294 middle of blade 8 (residues 435-453) has not been described before. Interestingly, the segment of  
295 SorLA corresponding to residues 433-444 in Sortilin forms an unstructured loop in the unbound crystal  
296 structure of SorLA, but is essential for peptide binding to SorLA and adopts structure in the presence  
297 peptide ligands (**Supplementary Fig. 6**). In the SorLA structure, this loop has been suggested to “push”  
298 the peptide ligands against the cavity wall of the  $\beta$ -propeller (Kitago et al., 2015). Based on the  
299 obtained HDX data, a similar mechanism seems to occur in Sortilin, as the majority of protected sites  
300 can be sub-localized to the first part of residues 435-453 (**Supplementary HDX plots**). The observed  
301 HDX reduction in segment 435-453 could also be due to a direct interaction between residues in this  
302 region and the NT residues not defined in the crystal structures of the Sortilin-NT complex (Quistgaard  
303 et al., 2014, 2009). However, this is highly unlikely as the distance between the C $\alpha$  Asn5 and the  
304 electron density tentatively assigned to C $\alpha$  of Pro10 of NT is only 17.2 Å (Quistgaard et al., 2014). Thus,  
305 the middle part of NT needs to fully extend across the cavity to connect Asn5 and Pro10, leaving  
306 insufficient conformational flexibility to bend towards and interact with segment 435-453. Hence, we  
307 propose that residues in the beginning of residues 435-453 of Sortilin folds down to interact with the  
308 N-terminal of NT, thus essentially directly participating in the NTIS2 binding site.

309  
310 The conformational stabilization induced by NT and proSort on Sortilin was highly similar (**Figs. 2 and**  
311 **3**). In good agreement, it has been shown that proSort binding can be outcompeted by NT, and that  
312 mutation in NTIS1 (Ser283Glu) abolishes proSort binding to Sortilin (C. Munck Petersen et al., 1999;  
313 Quistgaard et al., 2009). However, the magnitude of reduction in HDX in NTIS2 was markedly larger  
314 for proSort binding compared to NT binding (**Supplementary HDX plots**), suggesting that NTIS2 is not  
315 a low affinity modulatory interaction site for proSort, as it is for NT. Further, this is supported by the  
316 crystal structure of SorLA, where fragments of the SorLA propeptide were shown to engage in a  
317 binding site similar to NTIS2 in Sortilin (**Supplementary Fig. 6**). As the interaction between SorLA and  
318 peptide ligands was only mediated by backbone interactions Kitago et al. suggested that the binding  
319 site in SorLA is highly promiscuous and able to bind peptide ligands prone to  $\beta$ -amyloid aggregation.  
320 We find this suggestion to appear valid for the Sortilin-proSort interaction as well, as there is a good  
321 correlation between residues in proSort undergoing reductions in HDX upon Sortilin binding and the  
322 theoretical propensity of residues in proSort to form  $\beta$ -amyloid aggregates (**Fig. 3b,c**). Interestingly,  
323 Sortilin has also been reported to bind to Amyloid- $\beta_{40}$ , a prototype of  $\beta$ -amyloid forming peptides. This  
324 interaction is of moderate affinity ( $K_d=0.8\mu\text{M}$ ) (Carlo et al., 2013), highlighting that the interaction of  
325 proSort with NTIS1 is probably necessary for the high binding affinity of proSort to Sortilin.  
326 Furthermore, the observed reduction in HDX of proSort correlates with data in the literature, where  
327 the binding core of a similar construct was suggested to be residues 23-28 (Westergaard et al., 2004).

328 Overall, our results suggest that the C-terminal part of the region in proSort observing a structural  
329 stabilization in presence of Sortilin (residues 11-26) form a  $\beta$ -strand extension to blade 1 in the Sortilin  
330  $\beta$ -propeller (NTIS2). A  $\beta$ -strand that is pushed against the cavity wall of the  $\beta$ -propeller by the N-  
331 terminal part of residues 435-453 of Sortilin. Furthermore, some of the more N-terminal residues in



332 the segment of proSort experiencing a reduction in HDX, when bound to Sortilin, directly engage with  
333 residues in NTIS1.

334 Thus, the presented HDX results of the proSort-Sortilin complex provide a molecular mechanism  
335 for how the propeptide of Sortilin shields Sortilin from binding with other known Sortilin ligands, as it  
336 specifically binds strongly to residues in both NTIS1 and NTIS2 (in contrast to NT) (C. Munck Petersen  
337 et al., 1999). In a biological context this is highly important as only a minor fraction of active Sortilin is  
338 situated on the cell surface (~10%), whereas the remainder of the receptor population is found in  
339 intracellular compartments, especially in the Golgi compartment and vesicles, where Sortilin is  
340 implicated in complex trafficking and sorting pathways (Nielsen et al., 1999; Nykjaer & Willnow, 2012).  
341 Furthermore, it has recently been proposed that binding of the propeptide to Sortilin inhibits  
342 homodimer formation of Sortilin at acidic pH in late endosomes (Janulienė et al., 2017; Leloup et al.,  
343 2017). Hence, the ability of the propeptide to shield immature Sortilin from binding with its biological  
344 ligands and inhibit homodimer formation at low pH could be important to secure that these trafficking  
345 and sorting pathways are not disturbed.

346

#### 347 **Conformational response of Sortilin upon binding protein ligands**

348 Sortilin is capable of binding several proteins (Hu et al., 2010; Nielsen et al., 1999; Nykjaer et al., 2004;  
349 C. M. Petersen et al., 1997; Teng et al., 2005). In the present study, we have investigated the complex  
350 formation of Sortilin with proNGF and PGRN. The mapping of the binding impact of proNGF on Sortilin  
351 showed that the presence of proNGF caused conformational stabilization of Sortilin residues in the N-  
352 terminal part of NTIS1, while no conformational effects were observed in NTIS2 (**Fig. 4**). Earlier studies  
353 have shown that NT is able to outcompete proNGF binding to Sortilin (Nykjaer et al., 2004). As NTIS1  
354 was stabilized by both proNGF and NT, and NTIS2 was unperturbed by proNGF, our results strongly  
355 indicate that NTIS1 is the primary interaction site for proNGF on Sortilin. This suggestion is in contrast  
356 to a prior study that identified a linear epitope of Sortilin residues 163-174 to be essential for proNGF  
357 binding to Sortilin (Serup Andersen et al., 2010). In the present study, no signs of conformational  
358 changes were observed in these residues for either proNGF, GSTpro or NT binding to Sortilin (**Figs. 2**  
359 **and 4, Supplementary Fig. 4 and Supplementary HDX plots**). It is important to note that the  
360 interaction of proNGF with Sortilin appears to be of a different molecular nature than that of proSort  
361 and NT, as the mutation Ser283Glu has been shown to abolish proSort and NT binding to Sortilin but  
362 not proNGF binding (Quistgaard et al., 2009). Hence, the ability of NT to inhibit proNGF binding to  
363 Sortilin could be steric in nature rather than a competition of binding to an identical binding pocket.

364 Our results demonstrate that proNGF binding impacts residues outside of NTIS1 evidenced by  
365 selective reductions in HDX in regions on the outer rim of the  $\beta$ -propeller (residues 428-433, 387-395  
366 and 455-466) of Sortilin upon proNGF binding. The specific importance of region 455-466 have  
367 recently been supported by mutational studies, as proNGF has decreased affinity towards a Ala464Glu  
368 mutation of Sortilin (Leloup et al., 2017). ProNGF impacts primarily the top of the  $\beta$ -propeller as HDX  
369 reductions in NTIS1 of the largest magnitude can be sub-localized to residues 307-317 and the surface  
370 patch on the outer rim of the  $\beta$ -propeller. Interestingly, this entails that the reduction in HDX observed  
371 in the 10CC-b domain is of an indirect (allosteric) nature (**Fig. 4**). This will be discussed further in the  
372 context of PGRN binding.

373 The binding mode of proNGF to Sortilin was further revealed by the HDX analysis of Sortilin in the  
374 presence of NGF and GSTpro. NGF alone had no impact on Sortilin, while GSTpro binding closely  
375 emulated the impact of proNGF binding, even the allosteric effects observed in the 10CC-b domain  
376 (**Fig. 4 and Supplementary Fig. 4**). Thus, we conclude that the conformational stabilization of Sortilin

377 by proNGF is mediated exclusively by the propeptide of proNGF. Analysis of the HDX of either proNGF  
378 or GSTpro upon Sortilin binding showed that Sortilin did not induce significant folding or induction of  
379 stable higher-order structure in the interacting propeptide of proNGF. This is probably due to the  
380 highly flexible nature of the pro-part of proNGF (Paoletti et al., 2009, 2011; Esben Trabjerg et al.,  
381 2017). Earlier studies have also suggested that the proNGF-Sortilin interaction is mediated via the pro-  
382 part of proNGF, as GSTpro has similar affinity towards Sortilin as proNGF and is able to outcompete  
383 proNGF binding (Nykjaer et al., 2004). Hence, GSTpro has been used as a surrogate ligand for proNGF  
384 binding in several mechanistic studies investigating Sortilin biology despite the incomplete molecular  
385 understanding of either proNGF or GSTpro binding to Sortilin (Carlo et al., 2013; Domeniconi & Chao,  
386 2008; Mortensen et al., 2014; Nykjaer et al., 2004; Serup Andersen et al., 2010). To our knowledge,  
387 this study shows for the first time that GSTpro impacts the conformation of Sortilin in a similar manner  
388 as proNGF and thus is an accurate surrogate. However, it is important to note that GSTpro is not able  
389 to induce the apoptotic effect of proNGF against neurons as simultaneous binding of proNGF to  
390 Sortilin and p75NTR (mediated by the mature part) is essential (He & Garcia, 2004; Nykjaer et al., 2004;  
391 Wehrman et al., 2007).

392  
393 Prior structural studies of the PGRN-Sortilin complex have shown that NT is able to outcompete PGRN  
394 binding and that residue Ser283 in NTIS1 is essential for PGRN binding to Sortilin (Hu et al., 2010;  
395 Zheng, Brady, Meng, Mao, & Hu, 2011). This is in good agreement with the conformational response  
396 of Sortilin to PGRN binding as residues of NTIS1 showed reduced HDX in the presence of PGRN (**Fig.**  
397 **5**). Furthermore, protection from HDX was also observed in NTIS2. The reduction of HDX in NTIS2 by  
398 PGRN binding was markedly more pronounced than for NT binding demonstrating a significant  
399 involvement of NTIS2 in the PGRN binding event (**Supplementary HDX plots**). In support, anti-Sortilin  
400 antibodies have recently been identified which are able to inhibit the PGRN-Sortilin interaction by  
401 binding to epitopes in and not far from NTIS2 (Biilmann-Rønn et al., 2017; Rosenthal, Schwabe, &  
402 Kurnellas, 2016).

403 We observed that the conformational response of PGRN to Sortilin binding was restricted to the  
404 C-terminal of PGRN. In direct support of this finding, PGRN binding to Sortilin has been shown to be  
405 abolished by deletion of the three last residues in the C-terminal (Hu et al., 2010; Zheng et al., 2011).  
406 However, the large conformational impact of Sortilin to PGRN binding, involving both a large surface  
407 of NTIS1 as well as NTIS2, could suggest additional direct interaction points in PGRN than just the very  
408 tip of the C-terminal. Especially, when the limited conformational response of Sortilin to AF38469  
409 binding, which is restricted to NTIS1, is considered (**Supplementary Fig. 3**). The missing interaction  
410 sites could be present in PGRN in the areas, where HDX data were not obtained for the PGRN-Sortilin  
411 complex (**Fig. 5** and **Supplementary Fig. 5**).

412 In general, when attempting to derive a structural model of a protein complex based on HDX data  
413 alone two challenges arises: 1) Conformational effects in the direct binding interface are not readily  
414 distinguishable from indirect conformational effects observed spatially remote from the binding  
415 interface (allosteric effects) (Wales & Engen, 2006), and 2) no spatial or orientational restraints are  
416 obtained. However, taken together with evidence from prior biochemical studies, inferences  
417 concerning the structure of the Sortilin-PGRN complex can be made. Our HDX results suggest that the  
418 C-terminal of PGRN is interacting with a similar binding pocket in NTIS1 as employed by the C-terminal  
419 of NT, as also suggested in the literature (Zheng et al., 2011). Whether the C-terminal is inserted into  
420 the binding pocket from the top or the bottom of the  $\beta$ -propeller is not obvious from our HDX data.  
421 However, HDX reduction in NTIS1 is most pronounced for residues on the top of the  $\beta$ -propeller

422 (residues 271-272 and 307-317) and the rest of the areas affected by the presence of PGRN are  
423 likewise found on the top of the  $\beta$ -propeller (**Fig. 5** and **Supplementary HDX-plots**). Furthermore,  
424 human anti-Sortilin antibodies able to inhibit PGRN binding bind to a region encompassing NTIS2 and  
425 its vicinity on the top of the  $\beta$ -propeller (Biilmann-Rønne et al., 2017; Rosenthal et al., 2016). Finally,  
426 the access to the cavity of the  $\beta$ -propeller from below is partly blocked by the N-linked glycosylation  
427 found at Asn373 (Quistgaard et al., 2009). Together, these observations thus suggest an interaction  
428 mode for PGRN and Sortilin, where the C-terminal of PGRN is inserted into the C-terminal NT binding  
429 pocket in NTIS1 from the top side of the  $\beta$ -propeller.

430

431 The model discussed above further implies that the reduced HDX observed in the 10CC-b domain upon  
432 PGRN binding is of an indirect/allosteric character, as was also indicated by HDX data on proNGF  
433 binding. It has in one earlier study been tentatively suggested that ligand binding in NTIS1 could be  
434 transmitted to the 10CC domains via a salt bridge interaction between Arg293 and Glu667 (Quistgaard  
435 et al., 2009). For both proNGF and PGRN binding, the reduced HDX in the 10CC-b domain strongly  
436 indicate allosteric signalling in Sortilin from NTIS1, or the nearby protected region of the outer rim of  
437 the propeller, to the 10CC-b domain (**Figs. 4** and **5**). Interestingly, upon PGRN binding, reduced HDX  
438 was observed in a segment of Sortilin (residues 641-644) that could bridge the reduced HDX observed  
439 in NTIS1 with the conformational stabilization observed in the 10CC-b domain (**Fig. 5**). Furthermore, a  
440 slight, but less pronounced reduction in HDX was also seen for the same residues upon proNGF and  
441 GSTpro binding. However, perhaps due the lower binding affinity of proNGF and GSTpro (Feng et al.,  
442 2010; Nykjaer et al., 2004), this HDX reduction did not exceed the general threshold value used in this  
443 study to conclude significance (**Supplementary HDX plots**). By inspecting the crystal structure, the  
444 residues Gln308 and Phe644, both placed in regions of Sortilin exhibiting reduced HDX upon PGRN  
445 binding, are in close proximity for propagating an allosteric signal from NTIS1 to the 10CC-b domain.  
446 However, any specific involvement of these two residues in transmitting a conformational change  
447 from the primary ligand binding region (NTIS1) on the top side of the propeller to the 10CC-b domain  
448 needs to be confirmed by future studies.

449 We note that the changes in HDX observed in the 10CC domain upon binding the larger protein  
450 ligands proNGF and PGRN could, in theory, also be due to an additional direct interaction site between  
451 protein ligands and the 10CC domain. However, we deem such a “tertiary” interaction site unlikely for  
452 the following reasons: 1) we did not observe separate regions in proNGF and PGRN impacted by  
453 Sortilin binding and 2) we observed that the pro-peptide of NGF was sufficient to induce the full  
454 binding impact on Sortilin, including effects in the 10CC domain. Furthermore, the NGF pro-peptide  
455 would need to span and interact with both NTIS1 in the beta-barrel as well as the 10CC domain which  
456 would involve at a minimum 23 residues (corresponding to approximately 85 Å solvent accessible  
457 surface distance (Matthew Allen Bullock, Schwab, Thalassinos, & Topf, 2016)) out of the total length  
458 of the pro-part of 103 residues. In doing so, a significant proportion of proNGF would thus need to  
459 adopt regions of ordered and less dynamic backbone structure. Our HDX data does not support such  
460 a notion, as the HDX of the backbone of the pro-part of NGF is unaffected by Sortilin binding and  
461 remains highly flexible even in the bound state. Irrespective of the direct or indirect nature of the  
462 observed stabilization in the membrane-proximal 10CC domain, it remains a unique conformational  
463 consequence of proNGF and PGRN binding, and as such could be important in ligand-specific  
464 downstream signaling.

465 The 10CC domains have shown to be highly flexible, as their structure dramatic changes upon  
466 change in pH and the oligomeric state of Sortilin (Januliene et al., 2017; Leloup et al., 2017).

467 Furthermore, in full-length Sortilin the 10CC domains are attached to the transmembrane helix, which  
468 connects the extracellular part of Sortilin with its cytoplasmic tail. Our observation of structural  
469 stabilization in the 10CC-b domain upon ligand binding of proNGF and PGRN could thus be of biological  
470 relevance, as a part of a conformational trigger mechanism. A trigger mechanism that either  
471 communicate a binding event on the extracellular side of the receptor across the membrane directing  
472 the Sortilin-ligand complex for endocytosis and lysosomal degradation (PGRN) or for recruitment of  
473 associated pro-apoptosis adapter proteins, such as P75NTR (proNGF). Additional biological studies are  
474 needed to confirm this hypothesis.

475

476

477 In summary, in this work we used HDX-MS to investigate the conformational dynamics of Sortilin in  
478 complex with several biological ligands. Our results revealed that all investigated ligands employ two  
479 separate binding surfaces opposite each other in the cavity of the  $\beta$ -propeller. A significant difference  
480 was observed in the conformational response of Sortilin to binding of peptide ligands (Sortilin  
481 propeptide and NT) compared to protein ligands (proNGF and PGRN). Most notably, the protein  
482 ligands caused conformational stabilization of residues in the 10CC-b domain, hinting at a previously  
483 unknown conformational link between the ligand binding region and this membrane-proximal region  
484 of the receptor. We suggest that this observed indirect stabilization could be implicated in the  
485 transmission of a ligand-binding signal across the membrane to initiate intracellular signalling. Overall,  
486 the obtained new insights into the solution-phase conformational dynamics of unbound and ligand-  
487 bound Sortilin, unravel how the conformation of the Sortilin receptor is impacted by its main  
488 endogenous peptide and protein ligands. This information could pave the way for a better  
489 understanding of how Sortilin exert endocytosis, sorting and apoptotic signalling in a ligand-  
490 dependent manner.

#### 491 **MATERIALS**

492 All reagents were purchased from Sigma-Aldrich, St. Louis MO, USA in analytical grade except the following: immobilized  
493 pepsin beads (Thermo Scientific, Waltham, MA, USA), recombinant Nerve growth factor- $\beta$  (residues 1-117) (Sino Biological  
494 Inc., Beijing, China), glutathione-S-transferase (GST) (GenScript, Piscataway, NJ, USA), proSort (GenScript), GlycoWorks  
495 RapiFluor-MS N-Glycan Kit (Waters Inc., Milford, MA, USA), tris(2-carboxyethyl)phosphine (TCEP) (Thermo Scientific) and  
496 AF38469 (H. Lundbeck A/S, Valby, Denmark).

497

#### 498 **METHODS**

##### 499 **Expression and purification of proteins.**

500 *Sortilin*: The extra cellular soluble domain of human Sortilin (residue -33 to 723) was engineered with a C-terminal fXa and  
501 His tag extension (GSAMIEGRGVGHHHHHH). The construct was cloned into an episomal expression vector pCEP-PU and used  
502 for transient expression in HEK293 cell. Cell culture was harvested by centrifugation followed by sterile filtration and  
503 captured on a HisTrap Column (GE Healthcare, Little Chalfont, UK) equilibrated with 20mM Sodium phosphate pH 7.4, 1M  
504 NaCl. Sortilin was eluted in a linear gradient to 0.5M imidazole over 15 column volumes in the same buffer. Fractions were  
505 analysed by SDS-PAGE and pooled according to purity and concentration of Sortilin determined by bicinchoninic acid assay  
506 (BCA) (Pierce Biotechnology, Waltham MA, USA). The pooled fractions was further purified by size-exclusion chromatography  
507 on a Superdex200 column (GE Healthcare) in a phosphate-buffered saline (PBS) solution of 2.67mM KCl, 1.47mM KH<sub>2</sub>PO<sub>4</sub>,  
508 137.93mM NaCl, 8.06mM Na<sub>2</sub>HPO<sub>4</sub> · 7H<sub>2</sub>O, pH 7.4 (Gibco, Thermo Fischer Scientific). Fractions were pooled according to  
509 purity (SDS-PAGE) and the final protein concentration was determined by BCA. Samples used for mapping the conformational  
510 response of PGRN to Sortilin binding were buffer exchanged by spin filtering (Vivapsin 500, Sartorius, Göttingen, Germany)  
511 into 20mM tris(hydroxymethyl)aminomethane (Tris), pH 7.4 and the protein concentration was determined by UV-  
512 wavelength spectrometry (NanoDrop 2000, Thermo Scientific).

513

514 *Progranulin*: A synthetic gene of human Progranulin gene was cloned into pcDNA 3.1 for expression in the freestyle system  
515 (Thermo Fischer Scientific). The culture media was clarified by centrifugation and sterile filtration. Subsequent purification

516 from culture media was done by capture on Capto-Q (GE Healthcare) in 20mM Tris pH 8.0, 1M NaCl followed by elution in a  
517 gradient to 0.5M imidazole in same buffer over 10 column volumes. Fractions eluting from the column was precipitated with  
518 2M  $(\text{NH}_4)_2\text{SO}_4$  and centrifuged. The precipitate was dissolved in PBS and separated by size-exclusion chromatography on a  
519 Superdex200 column (GE Healthcare). Fractions with Progranulin were identified by SDS-PAGE and pooled accordingly.  
520 Samples used for mapping the conformational response of PGRN to Sortilin binding were buffer exchanged by spin filtering  
521 (Vivapsin 500, Sartorius) into 20mM Tris, pH 7.4 and the protein concentration was determined by UV spectrophotometry  
522 (NanoDrop 2000, Thermo Scientific).

523

524 *The pro-form of Nerve growth factor- $\beta$* : Human proNGF is difficult to express and purify in high homogenous yield, because  
525 of the presence of three Furin cleavage sites in the pro-part. To meet this challenge a triple mutant of these Furin cleavage  
526 sites has been developed (Feng et al., 2010; Pagadala, Dvorak, & Neet, 2006). In the current study human glycosylated  
527 proNGF was expressed in a mammalian host cell as described in the literature (Esben Trabjerg et al., 2017).

528

529 *GSTpro*: GSTpro was engineered as a fusion of glutathion S-transferase (GST) merged at the C-terminal of GST to the pro part  
530 of proNGF. The construct was cloned into pGEX expression plasmid and used for expression in *E. coli* using the Overnight  
531 Express™ Autoinduction System 1 (Novagen Inc., Merck Corporation, Darmstadt, Germany). The cells were harvested, lysed  
532 and GSTpro was purified from the supernatant using standard Glutathion-sepharose affinity chromatography.

533

#### 534 **Quality control of proteins.**

535 The intact mass of all protein constructs and peptides was determined by either electrospray ionization (ESI) mass  
536 spectrometry (MS) or matrix-assisted laser desorption/ionization MS (data not shown). Furthermore, the sequence of all  
537 proteins was confirmed by generating a tryptic peptide map of all investigated proteins (data not shown). In short, the  
538 proteins were denatured (6M guanidinium hydrochloride, 30min at 60°), reduced (10mM DTT, 2h at 60°C) alkylated in the  
539 dark (20mM iodoacetamide, 30 min at 25°C) and digested with Trypsin (w/w 1:20 of enzyme:protein, 16h at 37°C). The tryptic  
540 peptide mixture was acidified with formic acid and loaded onto a reverse-phase UPLC-system (nanoAcquity, Waters Inc.),  
541 trapped on a C18-trap column (ACQUITY UPLC BEH C18 1.7 $\mu\text{m}$  VanGuard column, Waters Inc.) and desalted for 6min at  
542 200 $\mu\text{L}/\text{min}$ . The trap column was subsequently put in-line with a C18-analytical column (ACQUITY UPLC BEH C18 1.7 $\mu\text{m}$ , 1 x  
543 100mm column, Waters Inc.), where the tryptic peptides were separated by reverse-phase chromatography and ionized by  
544 positive ESI into a Q-TOF mass spectrometer (Synapt G2 or Synapt G2Si, Waters Inc., Wilmslow, UK). The tryptic peptides  
545 were analysed by tandem mass spectrometry (MS/MS) with collisional induced dissociation (CID). The mass spectrometer  
546 was operated in data-dependent acquisition mode (DDA). The acquired mass spectra were lock mass corrected against Glu-  
547 1-fibrinopeptide B (GFP) and analyzed in the PLGS 3.0 software, which matches precursor- and fragment ions to a local  
548 protein database. All positive hits were manually validated. Oxonium fragment ions of N-acetylglucosamine, sialic acid  
549 subtracted water and N-acetylglucosamine connected with galactose (204.0875m/z, 274.1732m/z and 366.14m/z) were used  
550 as reporter ions to manually identify N-linked glycopeptides (Cao et al., 2014).

551

#### 552 **Glycan analysis of Sortilin.**

553 The glycan analysis was performed as described for the GlycoWorks RapiFluor-MS N-Glycan Kit (Waters Inc.). In short Sortilin  
554 was denatured, reduced and treated with PNGase F. The released glycans were labelled with an easily ionized fluorophore  
555 and extracted by solid-phase-extraction. Following extraction the labelled glycans were separated by hydrophilic interaction  
556 liquid chromatography (HILIC) (nanoAcquity, Waters Inc.) and detected by fluorescence (Acquity UPLC FLR Detector, Waters  
557 Inc.) and ESI-MS (Xevo G2-XS QTof, Waters Inc.).

558

#### 559 **HDX-MS experiments.**

560 *Formation of protein complexes*: The protein complexes were formed by incubating the binding partners for at least 15min  
561 at 25°C before initiation of the HDX experiment to secure the labelling process to take place at steady-state conditions. The  
562 amount of ligand was adjusted to secure that at least 90% of the investigated protein/peptide was bound to its ligand, except  
563 for Sortilin bound to NT and GST (**Supplementary table 2**). NT was added in 1.5 and 15 times molecular excess to be able to  
564 compare the results with the published crystal structures (Quistgaard et al., 2014, 2009) and GST was added in the same  
565 molecular amount as GSTpro.

566

567 *Exchange reaction*: The exchange reaction was started by diluting the target protein or peptide (10-20pmol in 150mM NaCl,  
568 20mM Tris pH 7.4) in absence or presence of ligand 1:9 with 99%  $\text{D}_2\text{O}$  (150mM NaCl, 20mM Tris pD<sub>read</sub> 7.6) at 25°C. After  
569 various time intervals (**Supplementary table 3**) the exchange reaction was quenched by addition of ice cold quench buffer  
570 (0.8M TCEP, 2M glycine buffer pH 2.3) in an 1:1 relationship, thereby decreasing the pH to 2.3. The quenched samples were



571 immediately frozen to -80°C until analysis. Equilibrium deuterated control samples were prepared by incubating samples for  
572 24h at denaturing conditions (6M deuterated GdnHCl) 25°C. At least two time points for all states were recorded in triplicate  
573 except for AF38469 binding to Sortilin and Sortilin binding to proSort, proNGF and GSTpro (**Supplementary table 3**). For  
574 investigation of the impact of Sortilin binding to proSort, proNGF and GSTpro the samples was quenched with ice-cold  
575 300mM phosphate buffer pH 2.3. For investigation of the impact of Sortilin binding to PGRN the samples were prepared in  
576 buffers depleted for NaCl and quenched with ice-cold 2% formic acid (FA). Furthermore, the equilibrium labelled PGRN  
577 sample was prepared by labelling a PGRN sample for 6 days.

578  
579 *UPLC-HDX-MS setup:* The quenched samples were thawed and injected onto a cooled (0°C) reverse-phase UPLC-HDX-system  
580 (Waters Inc.) with an online home-packed pepsin column (internal volume of 60µL). The resulting peptic peptides were  
581 trapped onto a C18-trap column (ACQUITY UPLC BEH C18 1.7µm VanGuard column, Waters Inc.) and desalted for 3min at  
582 200µL/min with 0.23% FA in water. The trap column was put in-line with a C18 analytical column (ACQUITY UPLC BEH C18  
583 1.7µm, 1 x 100mm column, Waters Inc.) and the peptic peptides were separated by conventional reverse-phase  
584 chromatography (solvent A: 0.23% FA in water, solvent B: 0.23% FA in acetonitrile) and ionized by positive ESI into a high  
585 resolution Q-TOF mass spectrometer (Synapt G2Si, Waters Inc.). Here, the peptides were separated according to their ion  
586 mobility and mass-to-charge. Identification of peptides was performed on fully reduced and non-deuterated samples by  
587 MS/MS using a combination of data independent acquisition (MSe) and DDA. For investigation of Sortilin binding to PGRN  
588 the described UPLC-HDX-MS setup was modified to implement online electrochemical reduction as described in the  
589 literature (Mysling et al., 2014; Esben Trabjerg et al., 2015).

590  
591 *Data analysis:*

592 Peptide identification: The acquired mass spectra were lock mass corrected against GFP and analysed in PLGS 3.0, which  
593 matches precursor- and fragment ions to a local protein database. All fragment spectra of identified peptides were manually  
594 inspected. N-linked peptic glycopeptides were identified manually from data recorded by DDA acquisition.

595 Determination of deuterium incorporation: The acquired mass spectra were lock mass corrected against GFP and the  
596 deuterium incorporation for all peptides was determined by the software DynamX 3.0 (Waters Inc.).

597 Statistical analysis: All statistical analyses were performed in the Excel software (Microsoft, Redmond, WA, USA). All  
598 comparisons were performed with either a homoscedastic or a heteroscedastic Student's T-test with an  $\alpha$ -value set to 0.01.  
599 The choice to use either a homoscedastic or a heteroscedastic Student's T-test was determined by using an F-test with the  
600  $\alpha$ -level set to 0.05. The F-test compares the variance of deuterium uptake of a single peptide at a single time point from two  
601 different states. In the comparative HDX-MS analysis of protein or peptides in absence or presence of a ligand, a protein  
602 segment was considered to experience a significant difference in HDX if all of the following three requirements was fulfilled.  
603 1) A triplicate data point shows a significant difference in deuterium incorporation ( $p < 0.01$ ), 2) the absolute difference in  
604 deuterium incorporation was four times larger than the propagated standard error for the difference  
605 ( $SD_{\text{difference}} = \sqrt{SD_{\text{state A}}^2 + SD_{\text{state B}}^2}$ ) and 3) overlapping peptides showed similar HDX kinetics to dismiss false positive  
606 results.

607  
608 **ACKNOWLEDGMENTS**

609 We would like thank H. Lundbeck for providing protein material and AF38469. We gratefully acknowledge financial support  
610 from The Innovation Fund Denmark (Grant No. 1355-00165), The Marie Curie Actions Programme of the E.U (Grant No.  
611 PCIG09-GA-2011-294214), and the Danish Council for Independent Research | Natural Sciences (Steno Grant No. 11- 104058).

612  
613 **AUTHOR CONTRIBUTIONS**

614 S.C. and K.D.R. conceived and coordinated the study. S.C. and F.K. designed and constructed the vector for expression of  
615 Sortilin, PGRN and proNGF and performed the expression and purification. N.A.A. investigated the conformational impact of  
616 Sortilin binding to PGRN Z.W. investigated the conformational impact of AF3864 to Sortilin. E.T. conducted all other mass  
617 spectrometry experiments. S.C., K.D.R. and E.T. analysed the data and wrote the paper. All authors approved the final version  
618 of the manuscript.

619  
620 **COMPETING INTERESTS**

621 The authors declare no competing financial interests.

622  
623 **REFERENCES**

624 Andersen, J. L., Lindberg, S., Langgård, M., Maltas, P. J., Rønn, L. C. B., Bundgaard, C., Strandbygaard, D., Thirup, S., &  
625 Watson, S. P. (2017). The identification of novel acid isostere based inhibitors of the VPS10P family sorting receptor

- 626 Sortilin. *Bioorganic and Medicinal Chemistry Letters*, 27(11), 2629–2633. <https://doi.org/10.1016/j.bmcl.2017.02.028>
- 627 Andersen, J. L., Schrøder, T. J., Christensen, S., Strandbygård, D., Pallesen, L. T., García-Alai, M. M., Lindberg, S., Langgård,  
628 M., Eskildsen, J. C., David, L., Tagmose, L., Simonsen, K. B., Maltas, P. J., Rønn, L. C. B., De Jong, I. E. M., Malik, I. J.,  
629 Egebjerg, J., ... Thirup, S. (2014). Identification of the first small-molecule ligand of the neuronal receptor sortilin and  
630 structure determination of the receptor-ligand complex. *Acta Crystallographica Section D: Biological*  
631 *Crystallography*, 70(2), 451–460. <https://doi.org/10.1107/S1399004713030149>
- 632 Arora, J., Hickey, J. M., Majumdar, R., Esfandiary, R., Bishop, S. M., Samra, H. S., Middaugh, C. R., Weis, D. D., & Volkin, D. B.  
633 (2015). Hydrogen exchange mass spectrometry reveals protein interfaces and distant dynamic coupling effects  
634 during the reversible self-association of an IgG1 monoclonal antibody. *MAbs*, 7(3), 525–539.  
635 <https://doi.org/10.1080/19420862.2015.1029217>
- 636 Baker, M., Mackenzie, I. R., Pickering-Brown, S. M., Gass, J., Rademakers, R., Lindholm, C., Snowden, J., Adamson, J.,  
637 Sadovnick, A. D., Rollinson, S., Cannon, A., Dwosh, E., Neary, D., Melquist, S., Richardson, A., Dickson, D., Berger, Z.,  
638 ... Hutton, M. (2006). Mutations in progranulin cause tau-negative frontotemporal dementia linked to chromosome  
639 17. *Nature*, 442(7105), 916–919. <https://doi.org/10.1038/nature05016>
- 640 Beattie, M. S., Harrington, A. W., Lee, R., Kim, J. Y., Boyce, S. L., Longo, F. M., Bresnahan, J. C., Hempstead, B. L., & Yoon, S.  
641 O. (2002). ProNGF induces p75-mediated death of oligodendrocytes following spinal cord injury. *Neuron*, 36(3), 375–  
642 386. Retrieved from  
643 <http://www.pubmedcentral.nih.gov/articlerender.fcgi?artid=2681189&tool=pmcentrez&rendertype=abstract>
- 644 Bhandari, V., Palfrey, R. G., & Bateman, a. (1992). Isolation and sequence of the granulin precursor cDNA from human  
645 bone marrow reveals tandem cysteine-rich granulin domains. *Proceedings of the National Academy of Sciences of*  
646 *the United States of America*, 89(5), 1715–1719. <https://doi.org/10.1073/pnas.89.5.1715>
- 647 Biilmann-Rønn, L. C., Malik, I. J., Stavenhagen, J. B., Christensen, S., Egebjerg, J., Gerritsen, A., Vand den Brink, E., Parren, P.,  
648 & De Jong, R. (2017). Antibodies that bind to Sortilin and inhibit the binding of Progranulin. [https://doi.org/WO](https://doi.org/WO2017/009327A1)  
649 [2017/009327 A1](https://doi.org/WO2017/009327A1)
- 650 Cao, L., Tolić, N., Qu, Y., Meng, D., Zhao, R., Zhang, Q., Moore, R. J., Zink, E. M., Lipton, M. S., Paša-Tolić, L., & Wu, S. (2014).  
651 Characterization of intact N- and O-linked glycopeptides using higher energy collisional dissociation. *Analytical*  
652 *Biochemistry*, 452, 96–102. <https://doi.org/10.1016/j.ab.2014.01.003>
- 653 Carlo, A.-S., Gustafsen, C., Mastrobuoni, G., Nielsen, M. S., Burgert, T., Hartl, D., Rohe, M., Nykjaer, A., Herz, J., Heeren, J.,  
654 Kempa, S., Petersen, C. M., & Willnow, T. E. (2013). The pro-neurotrophin receptor sortilin is a major neuronal  
655 apolipoprotein E receptor for catabolism of amyloid- $\beta$  peptide in the brain. *The Journal of Neuroscience : The Official*  
656 *Journal of the Society for Neuroscience*, 33(1), 358–370. <https://doi.org/10.1523/JNEUROSCI.2425-12.2013>
- 657 Domeniconi, M., & Chao, M. V. (2008). Pro-NGF secreted by astrocytes promotes motor neuron cell death. *Molecular Cell*,  
658 34(2), 271–279. <https://doi.org/10.1016/j.mcn.2006.11.005>. Pro-NGF
- 659 Englander, S. W., & Kallenbach, N. R. (1983). Hydrogen exchange and structural dynamics of proteins and nucleic acids.  
660 *Quarterly Reviews of Biophysics*, 16(4), 521–655. <https://doi.org/10.1017/S0033583500005217>
- 661 Fahnestock, M., Michalski, B., Xu, B., & Coughlin, M. D. (2001). The precursor pro-nerve growth factor is the predominant  
662 form of nerve growth factor in brain and is increased in Alzheimer's disease. *Molecular and Cellular Neurosciences*,  
663 18(2), 210–220. <https://doi.org/10.1006/mcne.2001.1016>
- 664 Feng, D., Kim, T., Ozkan, E., Light, M., Torkin, R., Teng, K. K., Hempstead, B. L., & Garcia, K. C. (2010). Molecular and  
665 structural insight into proNGF engagement of p75NTR and sortilin. *Journal of Molecular Biology*, 396(4), 967–984.  
666 <https://doi.org/10.1016/j.jmb.2009.12.030>
- 667 Gass, J., Lee, W. C., Cook, C., Finch, N., Stetler, C., Jansen-West, K., Lewis, J., Link, C. D., Rademakers, R., Nykjaer, A., &  
668 Petrucelli, L. (2012). Progranulin regulates neuronal outgrowth independent of sortilin. *Molecular*  
669 *Neurodegeneration*, 7(1), 33. <https://doi.org/10.1186/1750-1326-7-33>
- 670 Gustafsen, C., Glerup, S., Pallesen, L. T., Olsen, D., Andersen, O. M., Nykjaer, A., Madsen, P., & Petersen, C. M. (2013).  
671 Sortilin and SorLA display distinct roles in processing and trafficking of amyloid precursor protein. *The Journal of*  
672 *Neuroscience : The Official Journal of the Society for Neuroscience*, 33(1), 64–71.  
673 <https://doi.org/10.1523/JNEUROSCI.2371-12.2013>
- 674 He, X.-L., & Garcia, K. C. (2004). Structure of nerve growth factor complexed with the shared neurotrophin receptor p75.  
675 *Science (New York, N.Y.)*, 304(5672), 870–875. <https://doi.org/10.1126/science.1095190>
- 676 Houde, D., Berkowitz, S. A., & Engen, J. R. (2011). The utility of hydrogen/deuterium exchange mass spectrometry in  
677 biopharmaceutical comparability studies. *Journal of Pharmaceutical Sciences*, 100(6), 2071–2086.  
678 <https://doi.org/10.1002/jps.22432>
- 679 Hrabal, R., Chen, Z., James, S., Bennett, H. P., & Ni, F. (1996). The hairpin stack fold, a novel protein architecture for a new  
680 family of protein growth factors. *Nature Structural Biology*, 3(9), 747–752. <https://doi.org/10.1038/nsb0196-95>
- 681 Hu, F., Padukkavidana, T., Vægter, C. B., Brady, O. a, Zheng, Y., Mackenzie, I. R., Feldman, H. H., Nykjaer, A., & Strittmatter,  
682 S. M. (2010). Sortilin-mediated endocytosis determines levels of the frontotemporal dementia protein, progranulin.  
683 *Neuron*, 68(4), 654–667. <https://doi.org/10.1016/j.neuron.2010.09.034>
- 684 Hvidt, A., & Linderstrom-Lang, K. (1955). The kinetics of the deuterium exchange of insulin with D<sub>2</sub>O; an amendment.  
685 *Biochimica et Biophysica Acta*, 16(1), 168–169. [https://doi.org/10.1016/0006-3002\(55\)90200-6](https://doi.org/10.1016/0006-3002(55)90200-6)
- 686 Hvidt, A., & Linderstrøm-Lang, K. (1954). Exchange of Hydrogen Atoms In Insulin with Deuterium Atoms in Aqueous  
687 Solution. *Biochimica et Biophysica Acta*, 14, 574–575.
- 688 Hvidt, A., & Nielsen, S. (1966). Hydrogen exchange in proteins. *Adv Protein Chem.*, 21, 287–386.

- 689 Jansen, P., Giehl, K., Nyengaard, J. R., Teng, K., Lioubinski, O., Sjoegaard, S. S., Breiderhoff, T., Gotthardt, M., Lin, F., Eilers,  
690 A., Petersen, C. M., Lewin, G. R., Hempstead, B. L., Willnow, T. E., & Nykjaer, A. (2007). Roles for the pro-  
691 neurotrophin receptor sortilin in neuronal development, aging and brain injury. *Nature Neuroscience*, *10*(11), 1449–  
692 1457. <https://doi.org/10.1038/nn2000>
- 693 Janulienė, D., Andersen, J. L., Nielsen, J. A., Quistgaard, E. M., Hansen, M., Strandbygaard, D., Moeller, A., Petersen, C. M.,  
694 Madsen, P., & Thirup, S. S. (2017). Acidic Environment Induces Dimerization and Ligand Binding Site Collapse in the  
695 Vps10p Domain of Sortilin. *Structure*, *25*(12), 1809–1819.e3. <https://doi.org/10.1016/j.str.2017.09.015>
- 696 Jensen, P. F., & Rand, K. D. (2016). Hydrogen Exchange: A Sensitive Analytical Window into Protein Conformation and  
697 Dynamics. In D. D. Weis (Ed.), *Hydrogen Exchange Mass Spectrometry of Proteins* (Vol. 32, pp. 1–17). Chichester, UK:  
698 John Wiley & Sons, Ltd. <https://doi.org/10.1002/9781118703748.ch1>
- 699 Kao, A. W., McKay, A., Singh, P. P., Brunet, A., & Huang, E. J. (2017). Progranulin, lysosomal regulation and  
700 neurodegenerative disease. *Nature Reviews Neuroscience*, *18*(6), 1–9. <https://doi.org/10.1038/nrn.2017.36>
- 701 Kitago, Y., Nagae, M., Nakata, Z., Yagi-Utsumi, M., Takagi-Niidome, S., Mihara, E., Nogi, T., Kato, K., & Takagi, J. (2015).  
702 Structural basis for amyloidogenic peptide recognition by sorLA. *Nature Structural & Molecular Biology*, *22*(3).  
703 <https://doi.org/10.1038/nsmb.2954>
- 704 Konermann, L., Pan, J., & Liu, Y.-H. (2011). Hydrogen exchange mass spectrometry for studying protein structure and  
705 dynamics. *Chemical Society Reviews*, *40*(3), 1224–1234. <https://doi.org/10.1039/c0cs00113a>
- 706 Lee, W. C., Almeida, S., Prudencio, M., Caulfield, T. R., Zhang, Y.-J., Tay, W. M., Bauer, P. O., Chew, J., Sasaguri, H., Jansen-  
707 West, K. R., Gendron, T. F., Stetler, C. T., Finch, N., Mackenzie, I. R., Rademakers, R., Gao, F.-B., & Petrucelli, L.  
708 (2014). Targeted manipulation of the sortilin-progranulin axis rescues progranulin haploinsufficiency. *Human*  
709 *Molecular Genetics*, *23*(6), 1467–1478. <https://doi.org/10.1093/hmg/ddt534>
- 710 Leloup, N., Lössl, P., Meijer, D. H., Brennich, M., Heck, A. J. R., Thies-Weesie, D. M. E., & Janssen, B. J. C. (2017). Low pH-  
711 induced conformational change and dimerization of sortilin triggers endocytosed ligand release. *Nature*  
712 *Communications*, *8*(1), 1–15. <https://doi.org/10.1038/s41467-017-01485-5>
- 713 Leurs, U., Lohse, B., Ming, S., Cole, P. a, Clausen, R. P., Kristensen, J. L., & Rand, K. D. (2014). Dissecting the binding mode of  
714 low affinity phage display peptide ligands to protein targets by hydrogen/deuterium exchange coupled to mass  
715 spectrometry. *Analytical Chemistry*, *86*(23), 11734–11741. <https://doi.org/10.1021/ac503137u>
- 716 Lowry, K. S., Murray, S. S., McLean, C. a, Talman, P., Mathers, S., Lopes, E. C., & Cheema, S. S. (2001). A potential role for  
717 the p75 low-affinity neurotrophin receptor in spinal motor neuron degeneration in murine and human amyotrophic  
718 lateral sclerosis. *Amyotrophic Lateral Sclerosis and Other Motor Neuron Disorders : Official Publication of the World*  
719 *Federation of Neurology, Research Group on Motor Neuron Diseases*, *2*(3), 127–134. Retrieved from  
720 <http://www.ncbi.nlm.nih.gov/pubmed/11771768>
- 721 Matthew Allen Bullock, J., Schwab, J., Thalassinou, K., & Topf, M. (2016). The Importance of Non-accessible Crosslinks and  
722 Solvent Accessible Surface Distance in Modeling Proteins with Restraints From Crosslinking Mass Spectrometry.  
723 *Molecular & Cellular Proteomics : MCP*, *15*(7), 2491–2500. <https://doi.org/10.1074/mcp.M116.058560>
- 724 Mazella, J., Zsürger, N., Navarro, V., Chabry, J., Kaghad, M., Caput, D., Ferrara, P., Vita, N., Gully, D., Maffrand, J. P., &  
725 Vincent, J. P. (1998). The 100-kDa neurotensin receptor is gp95/sortilin, a non-G-protein-coupled receptor. *The*  
726 *Journal of Biological Chemistry*, *273*(41), 26273–26276. Retrieved from  
727 <http://www.ncbi.nlm.nih.gov/pubmed/9756851>
- 728 McAllister, R. G., & Konermann, L. (2015). Challenges in the interpretation of protein h/d exchange data: a molecular  
729 dynamics simulation perspective. *Biochemistry*, *54*(16), 2683–2692. <https://doi.org/10.1021/acs.biochem.5b00215>
- 730 Morgan, C. R., & Engen, J. R. (2009). Investigating solution-phase protein structure and dynamics by hydrogen exchange  
731 mass spectrometry. *Current Protocols in Protein Science*, *58*, 17.6.1-17.6.17.  
732 <https://doi.org/10.1002/0471140864.ps1706s58>
- 733 Mortensen, M. B., Kjolby, M., Gunnarsen, S., Larsen, J. V., Palmfeldt, J., Falk, E., Nykjaer, A., & Bentzon, J. F. (2014).  
734 Targeting sortilin in immune cells reduces proinflammatory cytokines and atherosclerosis. *Journal of Clinical*  
735 *Investigation*, *124*(12), 5317–5322. <https://doi.org/10.1172/JCI76002>
- 736 Mysling, S., Salbo, R., Ploug, M., & Jørgensen, T. J. D. (2014). Electrochemical reduction of disulfide-containing proteins for  
737 hydrogen/deuterium exchange monitored by mass spectrometry. *Analytical Chemistry*, *86*(1), 340–345.  
738 <https://doi.org/10.1021/ac403269a>
- 739 Nielsen, M. S., Jacobsen, C., Olivecrona, G., Gliemann, J., & Petersen, C. M. (1999). Sortilin/neurotensin receptor-3 binds  
740 and mediates degradation of lipoprotein lipase. *Journal of Biological Chemistry*, *274*(13), 8832–8836.  
741 <https://doi.org/10.1074/jbc.274.13.8832>
- 742 Nielsen, M. S., Madsen, P., Christensen, E. I., Nykjaer, A., Gliemann, J., Kasper, D., Pohlmann, R., & Petersen, C. M. (2001).  
743 The sortilin cytoplasmic tail conveys Golgi-endosome transport and binds the VHS domain of the GGA2 sorting  
744 protein. *The EMBO Journal*, *20*(9), 2180–2190. <https://doi.org/10.1093/emboj/20.9.2180>
- 745 Nykjaer, A., Lee, R., Teng, K. K., & Jansen, P. (2004). Sortilin is essential for proNGF- induced neuronal cell death. *Nature*,  
746 *427*, 843–848. <https://doi.org/10.1038/nature02289>
- 747 Nykjaer, A., & Willnow, T. E. (2012). Sortilin: A receptor to regulate neuronal viability and function. *Trends in*  
748 *Neurosciences*, *35*(4), 261–270. <https://doi.org/10.1016/j.tins.2012.01.003>
- 749 Pagadala, P. C., Dvorak, L. A., & Neet, K. E. (2006). Construction of a mutated pro-nerve growth factor resistant to  
750 degradation and suitable for biophysical and cellular utilization. *Proceedings of the National Academy of Sciences of*  
751 *the United States of America*, *103*(47), 17939–17943. <https://doi.org/10.1073/pnas.0604139103>

- 752 Paoletti, F., Covaceuszach, S., Konarev, P. V., Gonfloni, S., Malerba, F., Schwarz, E., Svergun, D. I., Cattaneo, A., & Lamba, D.  
753 (2009). Intrinsic structural disorder of mouse proNGF. *Proteins*, 75(4), 990–1009.  
754 <https://doi.org/10.1002/prot.22311>
- 755 Paoletti, F., Malerba, F., Kelly, G., Noinville, S., Lamba, D., Cattaneo, A., & Pastore, A. (2011). Conformational plasticity of  
756 proNGF. *PLoS One*, 6(7), e22615. <https://doi.org/10.1371/journal.pone.0022615>
- 757 Perez, S. E., He, B., Nadeem, M., Wu, J., Scheff, S. W., Abrahamson, E. E., Ikonomic, M. D., & Mufson, E. J. (2015).  
758 Resilience of Precuneus Neurotrophic Signaling Pathways Despite Amyloid Pathology in Prodromal Alzheimer's  
759 Disease. *Biological Psychiatry*, 77(8), 693–703. <https://doi.org/10.1016/j.biopsych.2013.12.016>
- 760 Persson, F., & Halle, B. (2015). How amide hydrogens exchange in native proteins. *Proceedings of the National Academy of  
761 Sciences of the United States of America*, 112(33), 10383–10388. <https://doi.org/10.1073/pnas.1506079112>
- 762 Petersen, C. M., Nielsen, M. S., Jacobsen, C., Tauris, J., Jacobsen, L., Gliemann, J., Moestrup, S. K., & Madsen, P. (1999).  
763 Propeptide cleavage conditions sortilin/neurotensin receptor-3 for ligand binding. *EMBO Journal*, 18(3), 595–604.  
764 <https://doi.org/10.1093/emboj/18.3.595>
- 765 Petersen, C. M., Nielsen, M. S., Nykjaer, A., Jacobsen, L., Tommerup, N., Rasmussen, H. H., Roigaard, H., Gliemann, J.,  
766 Madsen, P., & Moestrup, S. K. (1997). Molecular Identification of a Novel Candidate Sorting Receptor Purified from  
767 Human Brain by Receptor-associated Protein Affinity Chromatography. *Journal of Biological Chemistry*, 272(6),  
768 3599–3605. <https://doi.org/10.1074/jbc.272.6.3599>
- 769 Quistgaard, E. M., Grøftehauge, M. K., Madsen, P., Pallesen, L. T., Christensen, B., Sørensen, E. S., Nissen, P., Petersen, C.  
770 M., & Thirup, S. S. (2014). Revisiting the structure of the Vps10 domain of human sortilin and its interaction with  
771 neurotensin. *Protein Science*, 23(9), 1291–1300. <https://doi.org/10.1002/pro.2512>
- 772 Quistgaard, E. M., Madsen, P., Grøftehauge, M. K., Nissen, P., Petersen, C. M., & Thirup, S. S. (2009). Ligands bind to Sortilin  
773 in the tunnel of a ten-bladed  $\beta$ -propeller domain. *Nature Structural & Molecular Biology*, 16(1), 96–98.  
774 <https://doi.org/10.1038/nsmb.1543>
- 775 Rosenthal, A., Schwabe, T., & Kurnellas, M. (2016). Anti-Sortilin Antibodies and Methods of use Thereof.  
776 <https://doi.org/10.1002/wo.2016.164637.a1>
- 777 Schrøder, T. J., Christensen, S., Lindberg, S., Laggård, M., David, L., Maltas, P. J., Eskildsen, J., Jacobsen, J., Tagmose, L.,  
778 Simonsen, K. B., Biilmann Rønn, L. C., De Jong, I. E. M., Malik, I. J., Karlsson, J. J., Bundgaard, C., Egebjerg, J.,  
779 Stavenhagen, J. B., ... Watson, S. P. (2014). The identification of AF38469: An orally bioavailable inhibitor of the  
780 VPS10P family sorting receptor Sortilin. *Bioorganic and Medicinal Chemistry Letters*, 24(1), 177–180.  
781 <https://doi.org/10.1016/j.bmcl.2013.11.046>
- 782 Serup Andersen, O., Boisguerin, P., Glerup, S., Skeldal, S., Volkmer, R., Willnow, T. E., Nykjaer, A., & Andersen, O. M. (2010).  
783 Identification of a linear epitope in sortilin that partakes in pro-neurotrophin binding. *The Journal of Biological  
784 Chemistry*, 285(16), 12210–12222. <https://doi.org/10.1074/jbc.M109.062364>
- 785 Skinner, J. J., Lim, W. K., Bédard, S., Black, B. E., & Englander, S. W. (2012a). Protein dynamics viewed by hydrogen  
786 exchange. *Protein Science : A Publication of the Protein Society*, 21(7), 996–1005. <https://doi.org/10.1002/pro.2081>
- 787 Skinner, J. J., Lim, W. K., Bédard, S., Black, B. E., & Englander, S. W. (2012b). Protein hydrogen exchange: Testing current  
788 models. *Protein Science*, 21(7), 987–995. <https://doi.org/10.1002/pro.2082>
- 789 Teng, H. K., Teng, K. K., Lee, R., Wright, S., Tevar, S., Almeida, R. D., Kermani, P., Torkin, R., Chen, Z.-Y., Lee, F. S., Kraemer,  
790 R. T., Nykjaer, A., & Hempstead, B. L. (2005). ProBDNF induces neuronal apoptosis via activation of a receptor  
791 complex of p75NTR and sortilin. *The Journal of Neuroscience : The Official Journal of the Society for Neuroscience*,  
792 25(22), 5455–5463. <https://doi.org/10.1523/JNEUROSCI.5123-04.2005>
- 793 Tolkatchev, D., Malik, S., Vinogradova, A., Wang, P., Chen, Z., Xu, P., Bennett, H. P. J., Bateman, A., & Ni, F. (2008). Structure  
794 dissection of human progranulin identifies well-folded granulin/epithelin modules with unique functional activities.  
795 *Protein Science : A Publication of the Protein Society*, 17(4), 711–724. <https://doi.org/10.1110/ps.073295308>
- 796 Trabjerg, E., Jakobsen, R. U., Mysling, S., Christensen, S., Jørgensen, T. J. D., & Rand, K. D. (2015). Conformational Analysis  
797 of Large and Highly Disulfide-Stabilized Proteins by Integrating Online Electrochemical Reduction into an Optimized  
798 H/D Exchange Mass Spectrometry Workflow. *Analytical Chemistry*, 87(17), 8880–8888.  
799 <https://doi.org/10.1021/acs.analchem.5b01996>
- 800 Trabjerg, E., Jakobsen, R. U., Mysling, S., Christensen, S., Jørgensen, T. J. D., & Rand, K. D. (2015). Conformational Analysis  
801 of Large and Highly Disulfide-Stabilized Proteins by Integrating Online Electrochemical Reduction into an Optimized  
802 H/D Exchange Mass Spectrometry Workflow. *Analytical Chemistry*, 87(17).  
803 <https://doi.org/10.1021/acs.analchem.5b01996>
- 804 Trabjerg, E., Kartberg, F., Christensen, S., & Rand, K. D. (2017). Conformational characterization of nerve growth factor- $\beta$   
805 reveals that its regulatory pro-part domain stabilizes three loop regions in its mature part. *The Journal of Biological  
806 Chemistry*, 292(40), 16665–16676. <https://doi.org/10.1074/jbc.M117.803320>
- 807 Trabjerg, E., Nazari, Z. E., & Rand, K. D. (2018). Conformational Analysis of Complex Protein States by Hydrogen/Deuterium  
808 Exchange Mass Spectrometry (HDX-MS): Challenges and Emerging Solutions. *TrAC Trends in Analytical Chemistry*,  
809 106, 125–138. <https://doi.org/10.1016/j.trac.2018.06.008>
- 810 Wales, T. E., & Engen, J. R. (2006). Hydrogen exchange mass spectrometry for the analysis of protein dynamics. *Mass  
811 Spectrometry Reviews*, 25(1), 158–170. <https://doi.org/10.1002/mas.20064>
- 812 Walsh, I., Seno, F., Tosatto, S. C. E., & Trovato, A. (2014). PASTA 2.0: An improved server for protein aggregation prediction.  
813 *Nucleic Acids Research*, 42(W1), 301–307. <https://doi.org/10.1093/nar/gku399>
- 814 Wehrman, T., He, X., Raab, B., Dukipatti, A., Blau, H., & Garcia, K. C. (2007). Structural and mechanistic insights into nerve



815 growth factor interactions with the TrkA and p75 receptors. *Neuron*, 53(1), 25–38.  
816 <https://doi.org/10.1016/j.neuron.2006.09.034>  
817 Westergaard, U. B., Sørensen, E. S., Hermey, G., Nielsen, M. S., Nykjaer, A., Kirkegaard, K., Jacobsen, C., Gliemann, J.,  
818 Madsen, P., & Petersen, C. M. (2004). Functional organization of the sortilin Vps10p domain. *The Journal of*  
819 *Biological Chemistry*, 279(48), 50221–50229. <https://doi.org/10.1074/jbc.M408873200>  
820 Zheng, Y., Brady, O. A., Meng, P. S., Mao, Y., & Hu, F. (2011). C-terminus of progranulin interacts with the beta-propeller  
821 region of sortilin to regulate progranulin trafficking. *PLoS One*, 6(6), e21023.  
822 <https://doi.org/10.1371/journal.pone.0021023>  
823 Zsürger, N., Mazella, J., & Vincent, J. P. (1994). Solubilization and purification of a high affinity neurotensin receptor from  
824 newborn human brain. *Brain Research*, 639(2), 245–252. [https://doi.org/10.1016/0006-8993\(94\)91737-X](https://doi.org/10.1016/0006-8993(94)91737-X)  
825  
826



827  
828  
829  
830  
831  
832  
833  
834  
835  
836  
837  
838  
839  
840  
841  
842  
843  
844  
845  
846  
847  
848  
849  
850

## Supplementary Information

# Investigating the conformational response of the Sortilin receptor upon binding endogenous peptide- and protein ligands by HDX-MS

Esben Trabjerg<sup>1,2</sup>, Nadia Abu-Asad<sup>1</sup>, Ziqian Wan<sup>1</sup>, Fredrik Kartberg<sup>2</sup>, Søren Christensen<sup>2</sup> and Kasper D. Rand<sup>1\*</sup>

<sup>1</sup>Department of Pharmacy, University of Copenhagen, Copenhagen, Denmark

<sup>2</sup>Biotherapeutic Discovery, H. Lundbeck A/S, Ottiliavej 9, Valby, Denmark

\*To whom correspondence should be addressed.

Page 21: **Table S1.** Analysis of PNGase F released glycans from Sortilin.

Page 22: **Table S2.** Overview of affinity constants used in the present study.

Page 23: **Table S3.** Overview of recorded HDX data.

Page 24: **Figure S1.** HDX-MS coverage map of Sortilin.

Page 25: **Figure S2.** Observation of discrepancies between the X-ray crystal structure and the solution-phase conformational dynamics of Sortilin.

Page 26: **Figure S3.** Conformational impact of AF38469 binding to Sortilin.

Page 27: **Figure S4.** Conformational response of Sortilin in presence of GSTpro, GST or NGF.

Page 28: **Figure S5.** HDX-MS coverage map of PGRN.

Page 29: **Figure S6.** Comparison of ligand-bound Sortilin and SorLA.

Page 30: **Supplementary HDX plots.**

851 **Table S1. Analysis of PNGase F released glycans from Sortilin.** Sortilin was denatured, reduced and treated with PNGase F  
 852 as described by the vendor of the GlycoWorks RapiFluor-MS N-Glycan Kit. The released glycans were labelled with an easily  
 853 ionized fluorophore and extracted by solid-phase-extraction. The labeled glycans were separated by hydrophilic interaction  
 854 liquid chromatography (HILIC) and detected by fluorescence and mass spectrometry. The table shows all identified N-linked  
 855 glycans with abundance higher than 5%. The exact glycan isomer has not been confirmed by mass spectrometry. Blue square:  
 856 N-acetylglucosamin, yellow circle: galactose, green circle: mannose, purple diamond: sialic acid, red triangle: fucose.

| Glycan                                                  | Abundance (%) | Structure – isomer not confirmed                                                     |
|---------------------------------------------------------|---------------|--------------------------------------------------------------------------------------|
| (Hex)6 + (Man)3(GlcNAc)2                                | 20.5          |    |
| (Hex)1(HexNAc)2(Deoxyhexose)1(NeuAc)1 + (Man)3(GlcNAc)2 | 11.3          |    |
| (Hex)4 + (Man)3(GlcNAc)2                                | 10.9          |    |
| (Hex)3 + (Man)3(GlcNAc)2                                | 8.4           |    |
| (Hex)7 + (Man)3(GlcNAc)2                                | 7.9           |    |
| (Hex)2(HexNAc)2(Deoxyhexose)1(NeuAc)2 + (Man)3(GlcNAc)2 | 7.6           |   |
| (Hex)2(HexNAc)2(Deoxyhexose)1(NeuAc)1 + (Man)3(GlcNAc)2 | 7.5           |  |
| (Hex)5 + (Man)3(GlcNAc)2                                | 7.2           |  |

857

858

859 **Table S2. Overview of affinity constants used in the present study.** All investigated binding interfaces were investigated in  
860 presence of excess ligand to secure a saturation of at least 90% of the binding interface of the target protein/peptide.

| <b>Sortilin ligand</b> | <b>Assay</b>                            | <b>K<sub>d</sub> (nM)</b> | <b>Reference</b>                 |
|------------------------|-----------------------------------------|---------------------------|----------------------------------|
| <b>NT</b>              | Isothermal titrations calorimetry (ITC) | 85                        | (Quistgaard et al., 2014)        |
| <b>AF38469</b>         | Scintillation Proximity Assay (SPA)     | Equipotent to NT          | (Schrøder et al., 2014)          |
| <b>proSort</b>         | Surface Plasmon Resonance (SPR)         | 20-30                     | (C. Munck Petersen et al., 1999) |
| <b>PGRN</b>            | Surface Plasmon Resonance (SPR)         | 8                         | (Hu et al., 2010)                |
| <b>proNGF</b>          | Surface Plasmon Resonance (SPR)         | 5                         | (Nykjaer et al., 2004)           |
| <b>GSTpro</b>          | Surface Plasmon Resonance (SPR)         | 8                         | (Nykjaer et al., 2004)           |
| <b>GST</b>             | Surface Plasmon Resonance (SPR)         | No binding detected       | (Nykjaer et al., 2004)           |
| <b>NGF</b>             | Surface Plasmon Resonance (SPR)         | 87                        | (Nykjaer et al., 2004)           |

861

862

863 **Table S3. Overview of recorded HDX data.** The numbers in the table refers to the number of replicate data for every single  
 864 time point.

| Protein/peptide | Ligand   | 10s | 15s | 1min | 10min | 1h | 3h | 8h |
|-----------------|----------|-----|-----|------|-------|----|----|----|
| Sortilin        | 1.5 x NT |     | 1   | 1    | 1     | 1  |    | 1  |
| Sortilin        | 15 x NT  |     | 3   | 3    | 3     | 3  |    | 1  |
| Sortilin        | AF 38469 |     | 3   | 1    | 1     | 1  |    | 1  |
| Sortilin        | proSort  |     | 1   | 3    | 1     | 1  |    | 1  |
| Sortilin        | PGRN     |     | 3   | 3    | 3     | 1  |    | 1  |
| Sortilin        | proNGF   |     | 3   | 3    | 3     | 1  |    | 1  |
| Sortilin        | GSTpro   |     | 3   | 3    | 1     | 1  |    | 3  |
| Sortilin        | GST      |     | 1   | 3    | 1     | 3  |    | 1  |
| Sortilin        | NGF      |     | 3   | 3    | 1     | 1  |    | 3  |
| proSort         | Sortilin | 4   |     | 1    | 1     |    |    |    |
| PGRN            | Sortilin |     | 3   | 3    | 1     | 1  | 1  |    |
| proNGF          | Sortilin | 4   |     | 1    | 1     | 1  |    |    |
| GSTpro          | Sortilin |     | 3   | 1    | 1     |    |    |    |

865

866

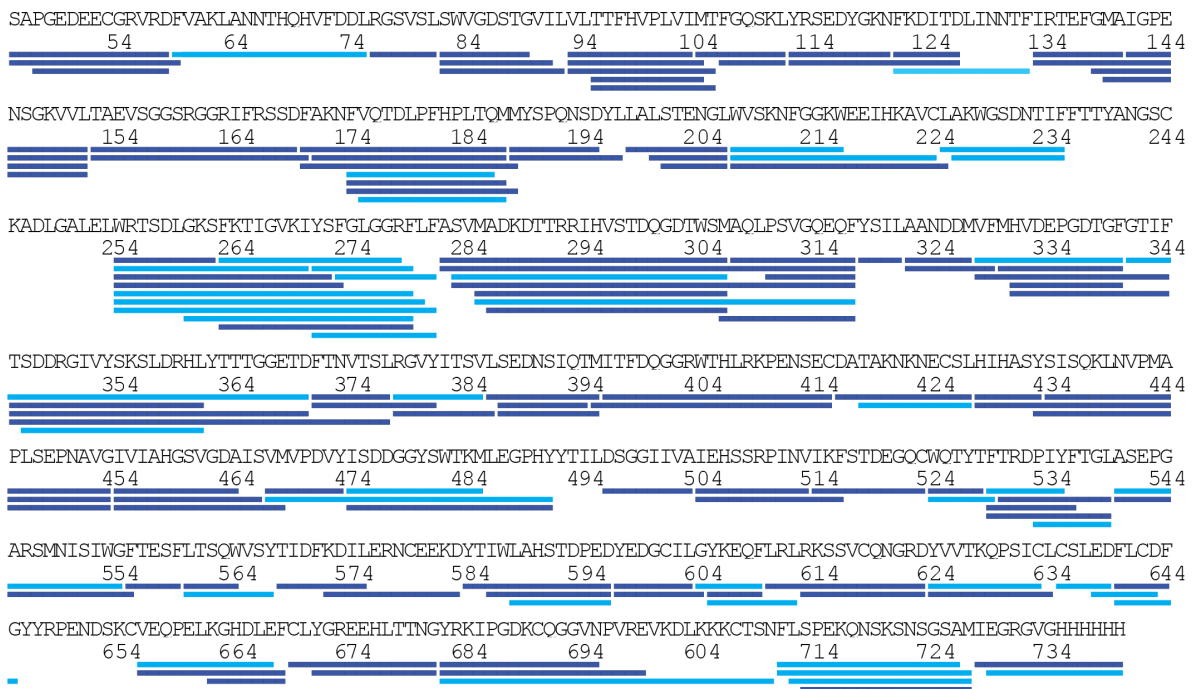

867

868

869 **Figure S1. HDX-MS coverage map of Sortilin.** The full sequence of the soluble extracellular domain for Sortilin is shown,  
870 including the C-terminal attached His6-tag. Peptic peptides from which HDX data could be obtained for all states are shown  
871 as blue bars. Light blue bar represents peptides, where HDX data was not obtained for all states.

872



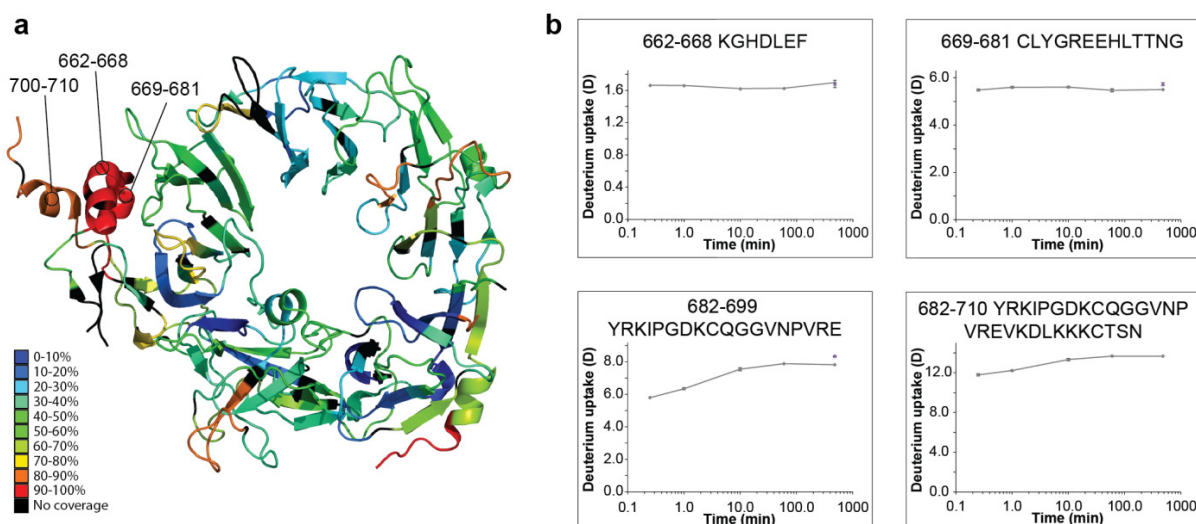

873

874 **Figure S2. Observation of discrepancies between the X-ray crystal structure and the solution-phase conformational**  
875 **dynamics of Sortilin.** The three N-terminal  $\alpha$ -helices of the extracellular part of Sortilin show no or very little protection from  
876 exchange. (a) The crystal structure of Sortilin (PDB ID: 4PO7) are coloured according to the normalized deuterium  
877 incorporation after 15s. (b) Absolute deuterium incorporation is plotted as a function of time for Sortilin peptides spanning  
878 the three N-terminal helices. Equilibrium labelled (90%) Sortilin control samples are plotted as filled purple triangles at the  
879 8h time point. SD is plotted as error bars (are only slightly visible). (n=3 for all time points and equilibrium labelled control  
880 sample, except the 8h time point where n=1)

881

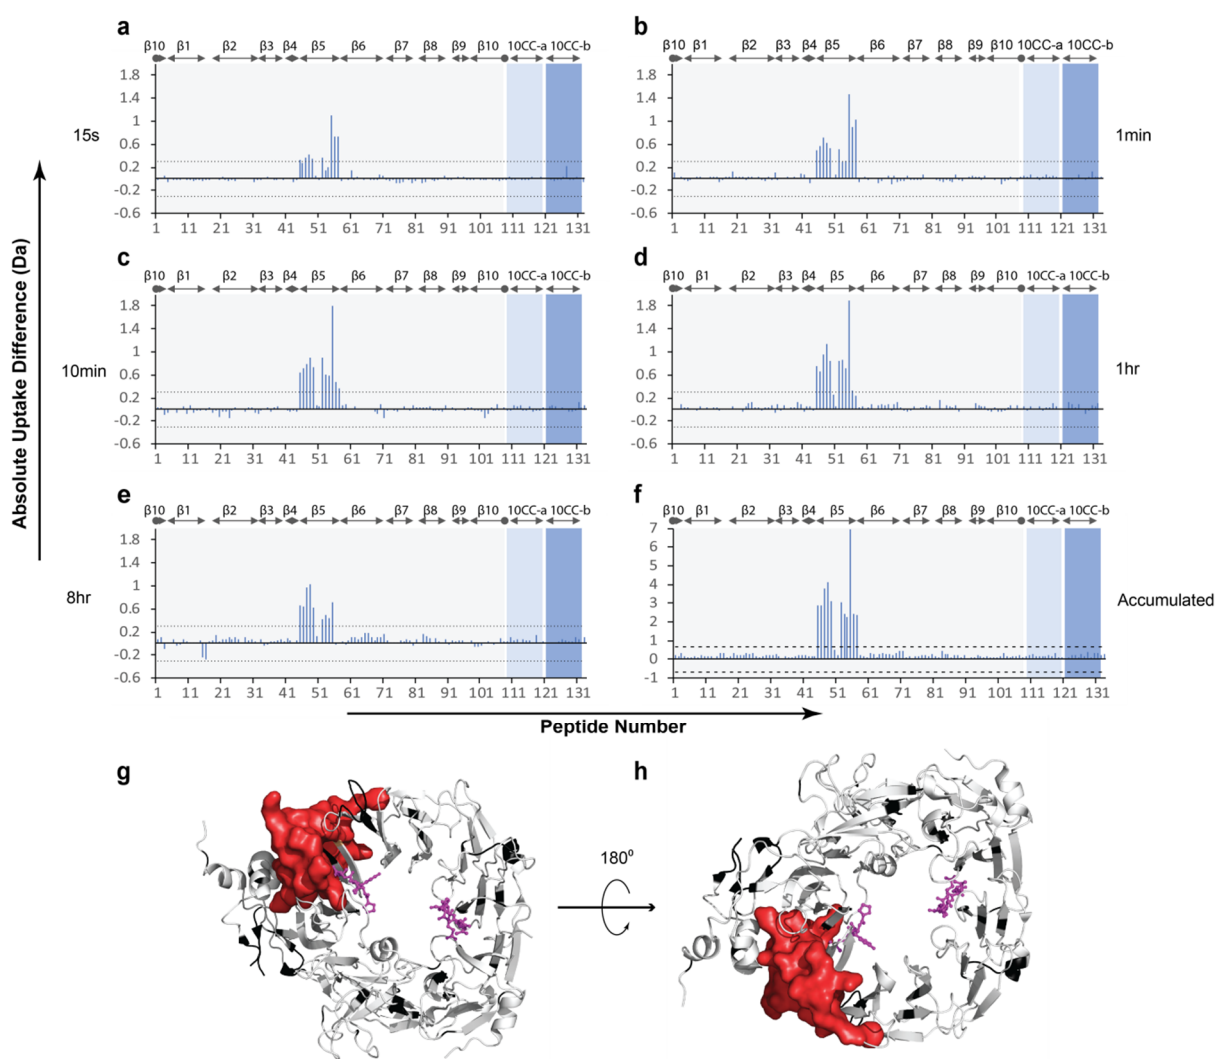

882

883 **Figure S3. Conformational impact of AF38469 binding to Sortilin.** (a-e) Absolute differences in deuterium uptake between  
 884 Sortilin in the presence and absence of AF38469 at 5 exposure time points determined by HDX-MS. The horizontal axis  
 885 denotes the peptide numbers from 1 to 133 starting from the N-terminal (**Supplemental HDX plots**). The vertical axis shows  
 886 the absolute differences in deuterium uptake between the two states. Positive bars indicate a decrease in deuterium uptake  
 887 upon binding of AF38469 to Sortilin, while negative bars indicate an increase in deuterium uptake upon binding of AF38469  
 888 to Sortilin. The dotted lines at  $\pm 0.3$  Da indicate the 98% confidence limits for significant differences, as defined in the  
 889 literature (Arora et al., 2015; Houde, Berkowitz, & Engen, 2011). The gray shades in the background represent blade 1 to 10  
 890 of the  $\beta$ -propeller, and the light blue and dark blue shades represent the 10CC-a and 10CC-b domains, the boundaries of  
 891 which are labelled at the top of each chart. (f) Accumulated differences in deuterium uptake across all the exposure time  
 892 points. The dashed lines at  $\pm 0.66$  Da indicate the 98% confidence limits for significant differences, as defined in the literature  
 893 (Arora et al., 2015; Houde et al., 2011). (g) Differential HDX results are mapped onto the crystal structure of Sortilin (PDB ID:  
 894 4PO7). Regions stabilized in the presence of NT are coloured red. Regions with no change in HDX are coloured white, while  
 895 regions without coverage are coloured black. The C- and N-terminal of NT are shown in magenta. (n=1 for all time points,  
 896 except the 15s time point, where n=3)

897

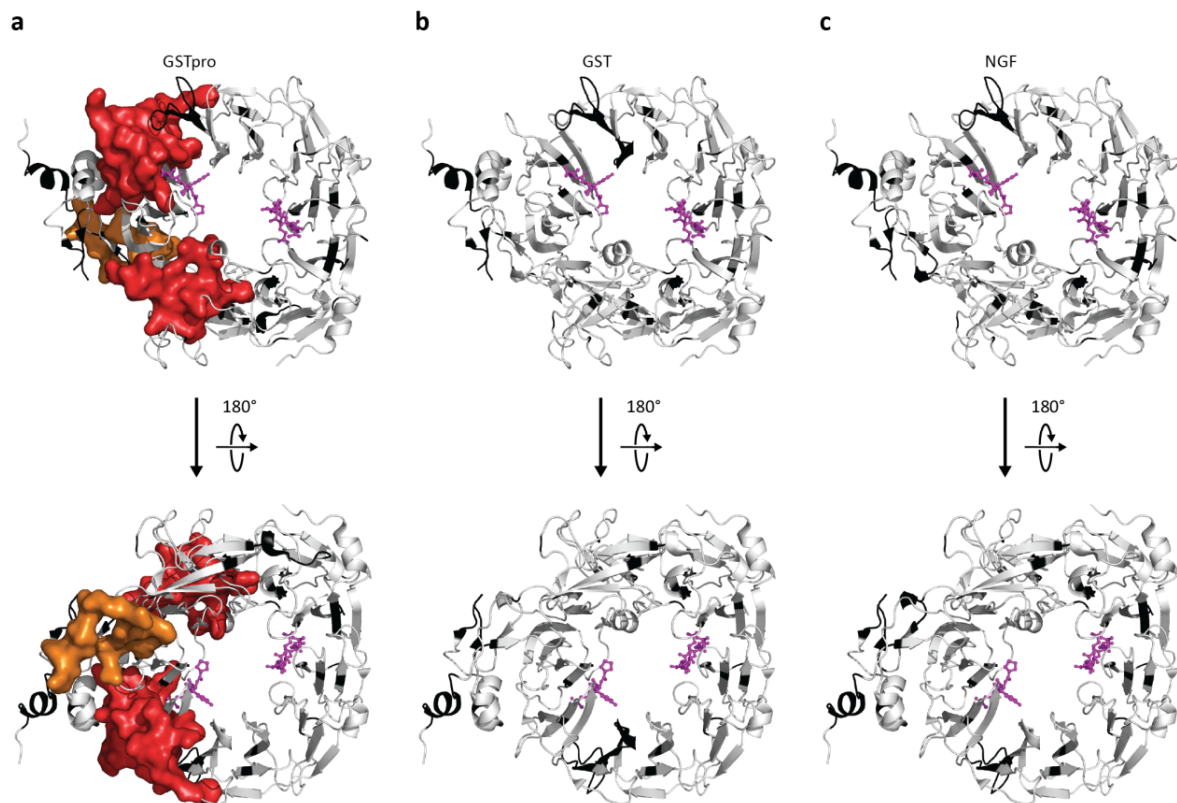

898

899 **Figure S4. Conformational response of Sortilin in presence of GSTpro, GST or NGF.** Differential HDX results of Sortilin in  
900 presence and absence of GSTpro (a), GST (b) and NGF (c) are mapped onto the crystal structure of Sortilin (PDB ID: 4PO7).  
901 Regions stabilized in the presence of proNGF are coloured red (β-propeller domain) and orange (10CC domains). Regions  
902 showing no change in HDX are coloured white, while regions without coverage are coloured black. The C- and N-terminal of  
903 NT are shown in magenta.

904

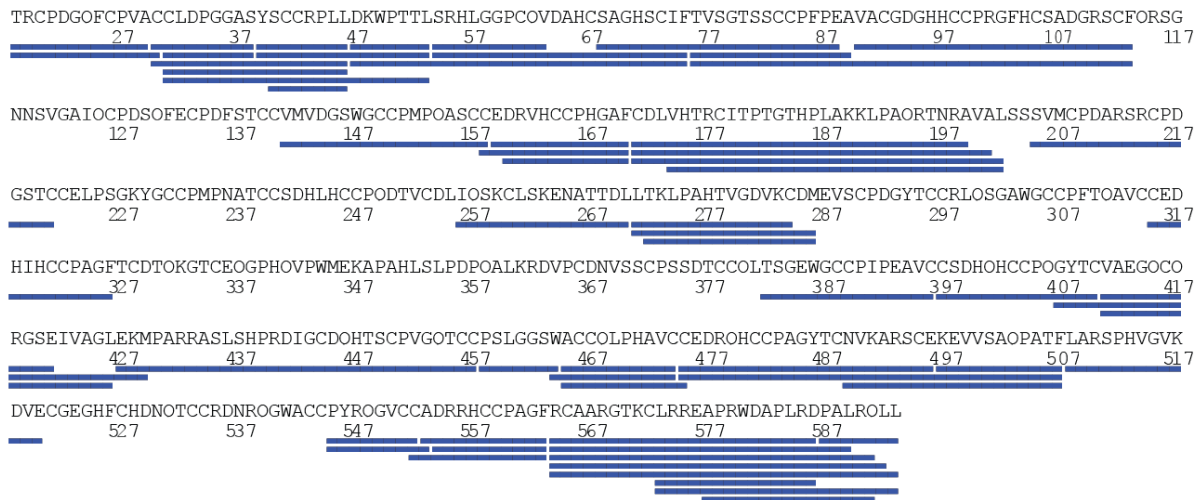

905

906 **Figure S5. HDX-MS coverage map of PGRN.** The full sequence of the PGRN construct used in the current study is shown.  
 907 Peptic peptides from which HDX data could be obtained are shown as blue bars. PGRN contains 88 cysteines forming a total  
 908 44 disulfide bonds, which were very difficult to reduce by conventional chemical reduction by TCEP, resulting in a sequence  
 909 coverage below 50% (data not shown). By implementing online electrochemical reduction into the HDX-MS workflow as  
 910 described in the literature (Mysling et al., 2014; E. Trabjerg et al., 2015), the sequence coverage was markedly increased to  
 911 71%. The lacking sequence coverage can mostly be ascribed to the presence of five N-linked glycosylation sites at (Asn118,  
 912 Asn236, Asn265, Asn368, Asn530), where coverage only was obtained for a single site (Asn265).

913

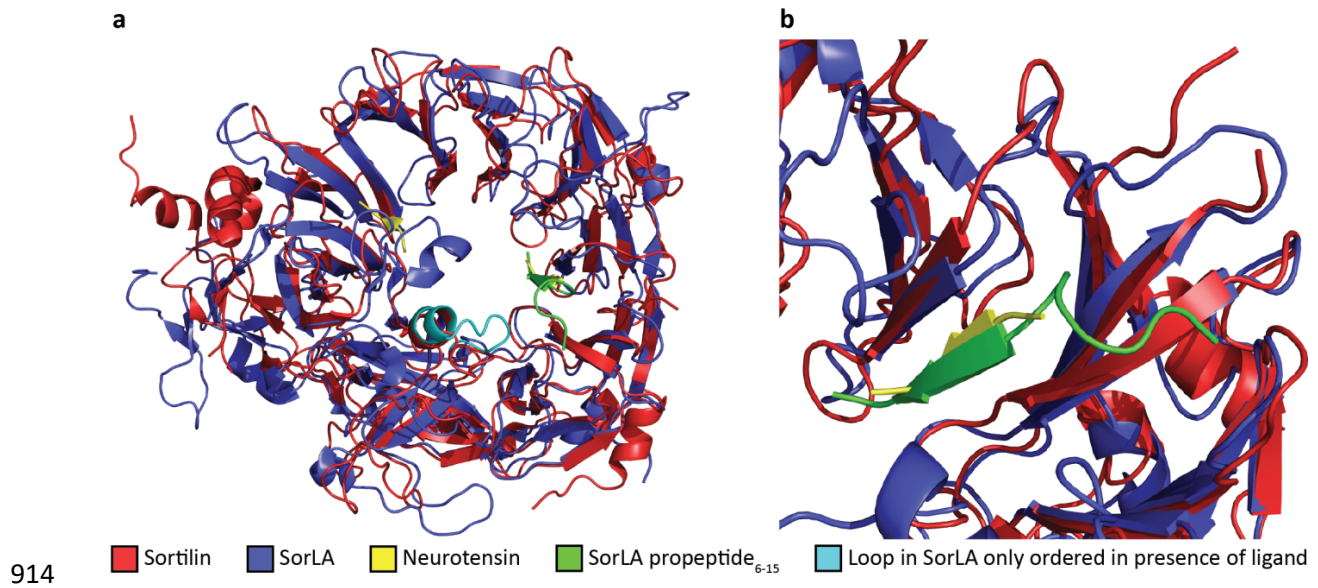

**Figure S6. Comparison of ligand-bound Sortilin (PDB ID: 4PO7) and SorLA (PDB ID: 3WSY).** (a) The peptide backbone of Sortilin (red) bound to NT (yellow) and SorLA (blue) bound to a fragment of its own propeptide (green) was aligned using the PYMOL software (DeLano Scientific LLC) (RMSD=3.2Å). The  $\beta$ -propellers for the two proteins align very well, while larger differences are observed for the 10CC domains. The cyan coloured loop in the SorLA structure is only ordered in the presence of ligands (fragments of SorLA propeptide or A $\beta$ ) (b) Zoom of the SorLA propeptide binding site and the secondary NT interaction site (NTIS2). Both ligands are employing a similar binding interface by forming a  $\beta$ -strand extension to blade 1 of both receptors.

923 **Supplementary HDX plots**

924

HDX plots of Sortilin in presence of NT. Absolute deuterium incorporation is plotted as a function of time for Sortilin (gray lines), Sortilin in presence of 1.5 times molar excess of NT (red lines) and Sortilin in presence of 15 times molar excess of NT (blue lines). Equilibrium labelled (90%) Sortilin control samples are plotted as filled purple triangles at the 8h time point. SD is plotted as error bars (are only slightly visible). (n=3 for all time points and the equilibrium labelled sample, except the 8h time point where n=1 for Sortilin and Sortilin in presence of 15 times molar excess of NT. n=1 for Sortilin in presence of 1.5 times molar excess of NT)

925

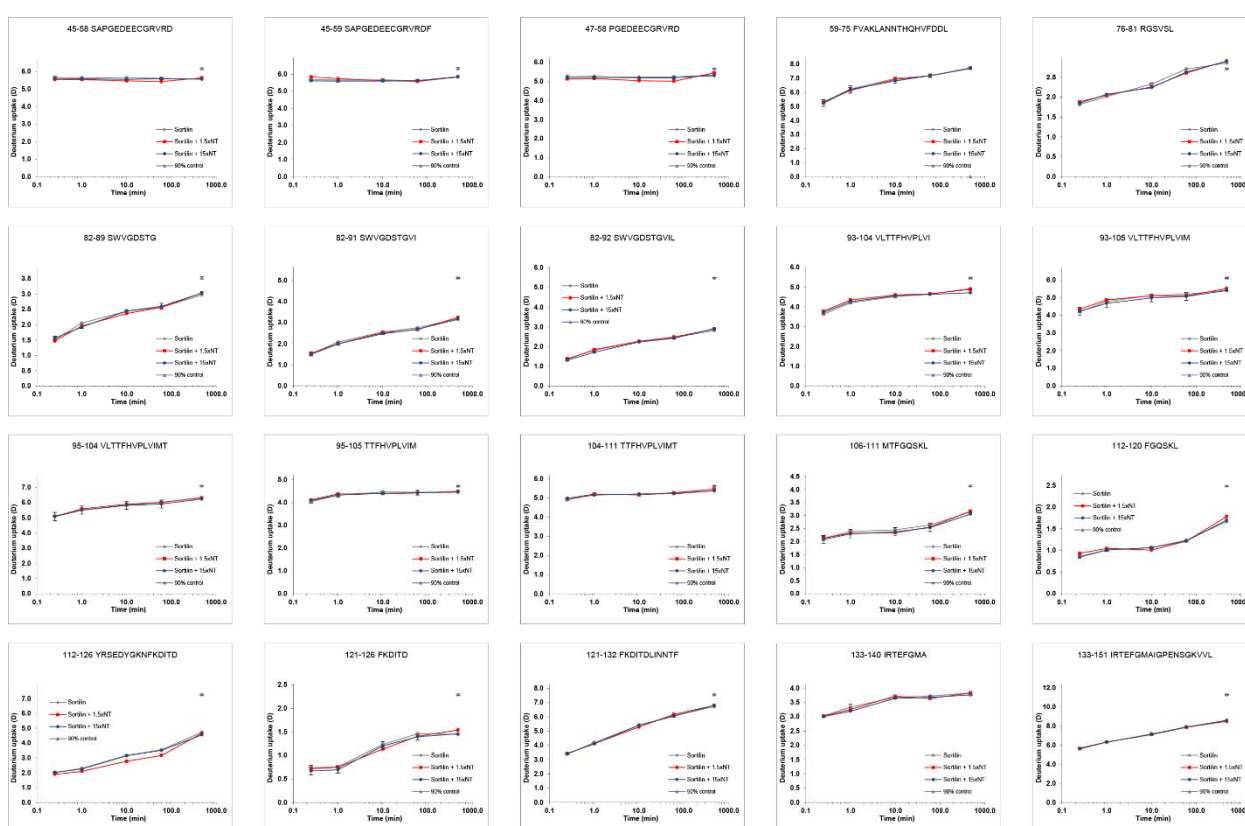

926

927





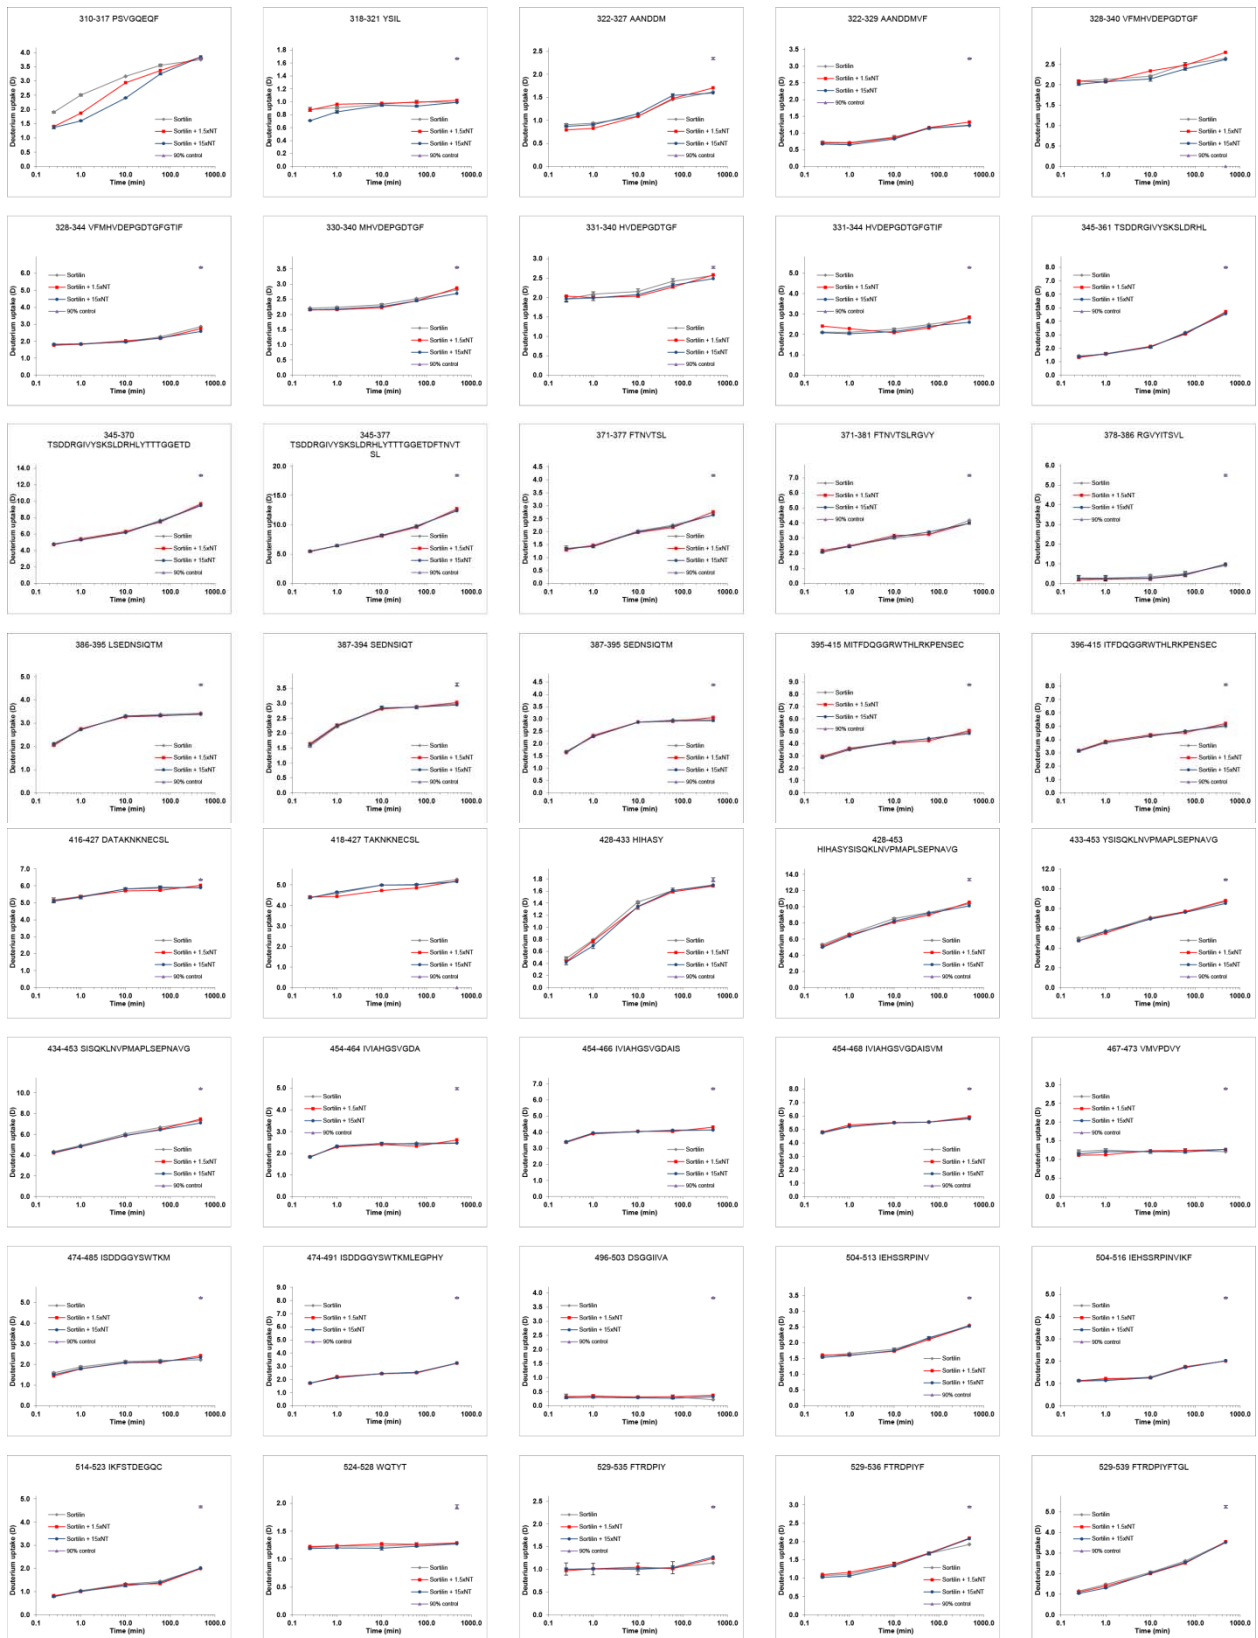

930

931

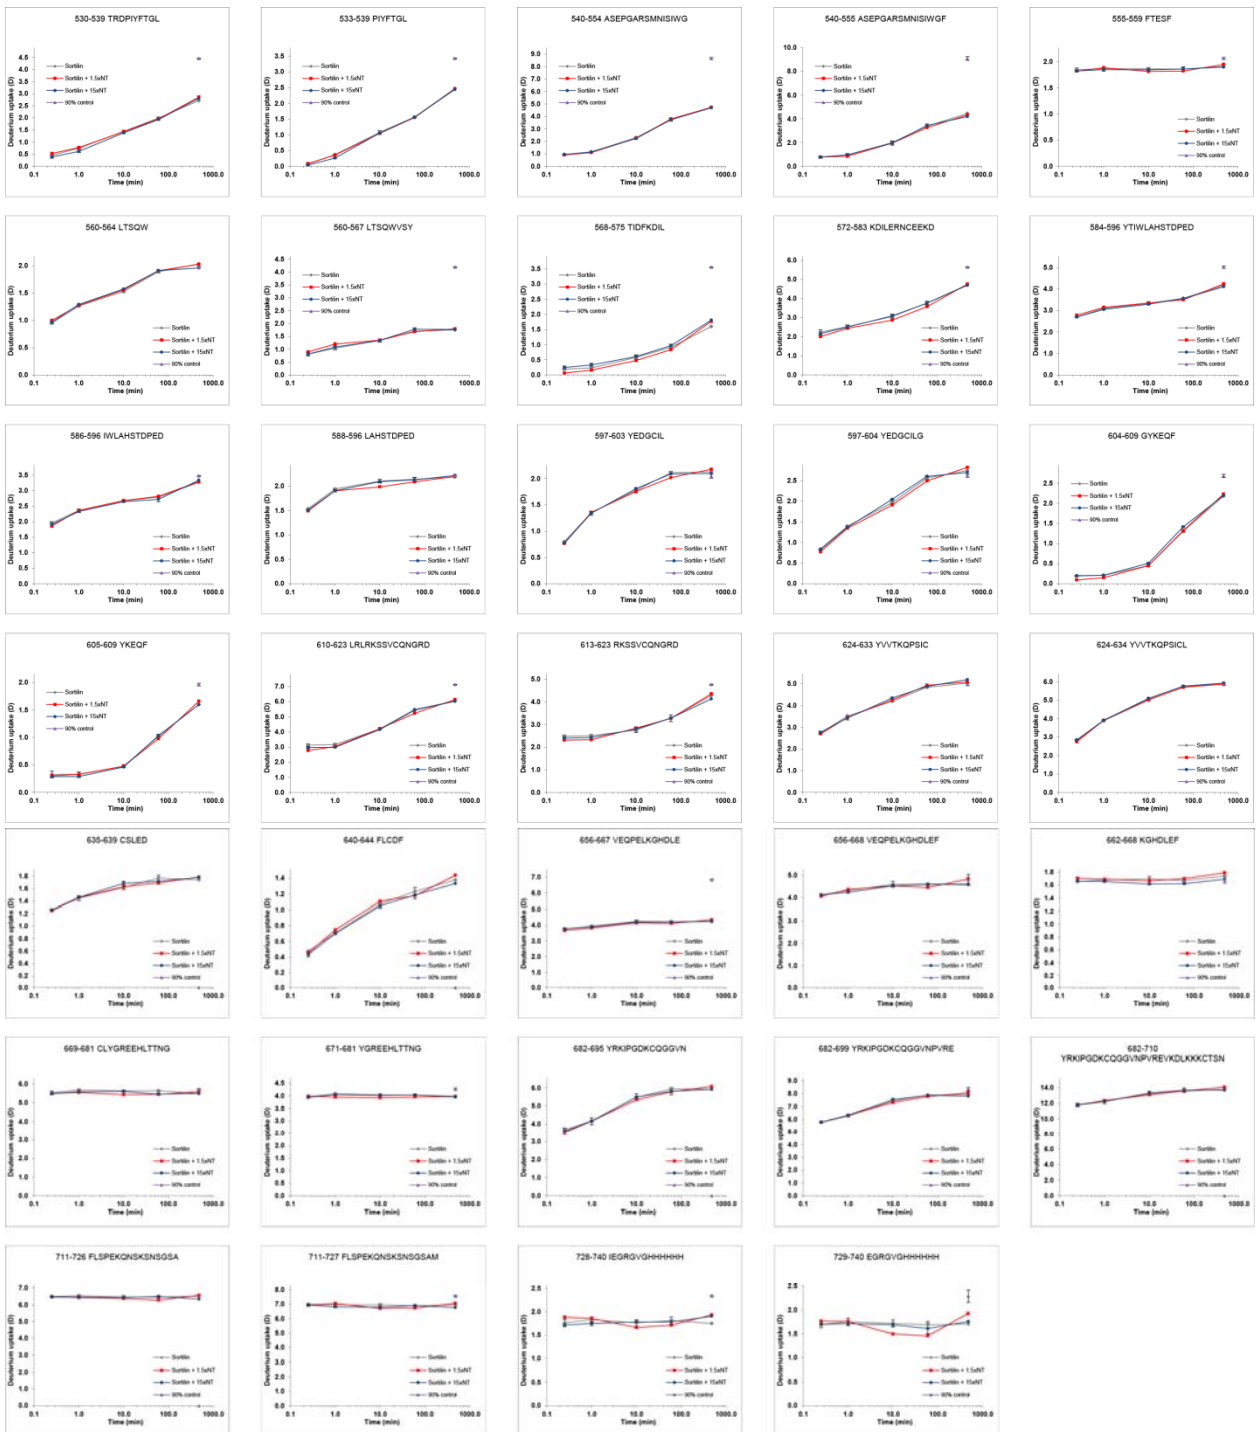

932

933

934

HDX plots of Sortilin in presence of AF38469. Absolute deuterium incorporation is plotted as a function of time for Sortilin (gray lines) and Sortilin in presence of AF38469 (red lines). Equilibrium labeled (90%) Sortilin control samples are plotted as filled purple triangles at the 8h time point. SD is plotted as error bars (are only slightly visible). (n=1 for all time points, except the 15s time point, where n=3)

935

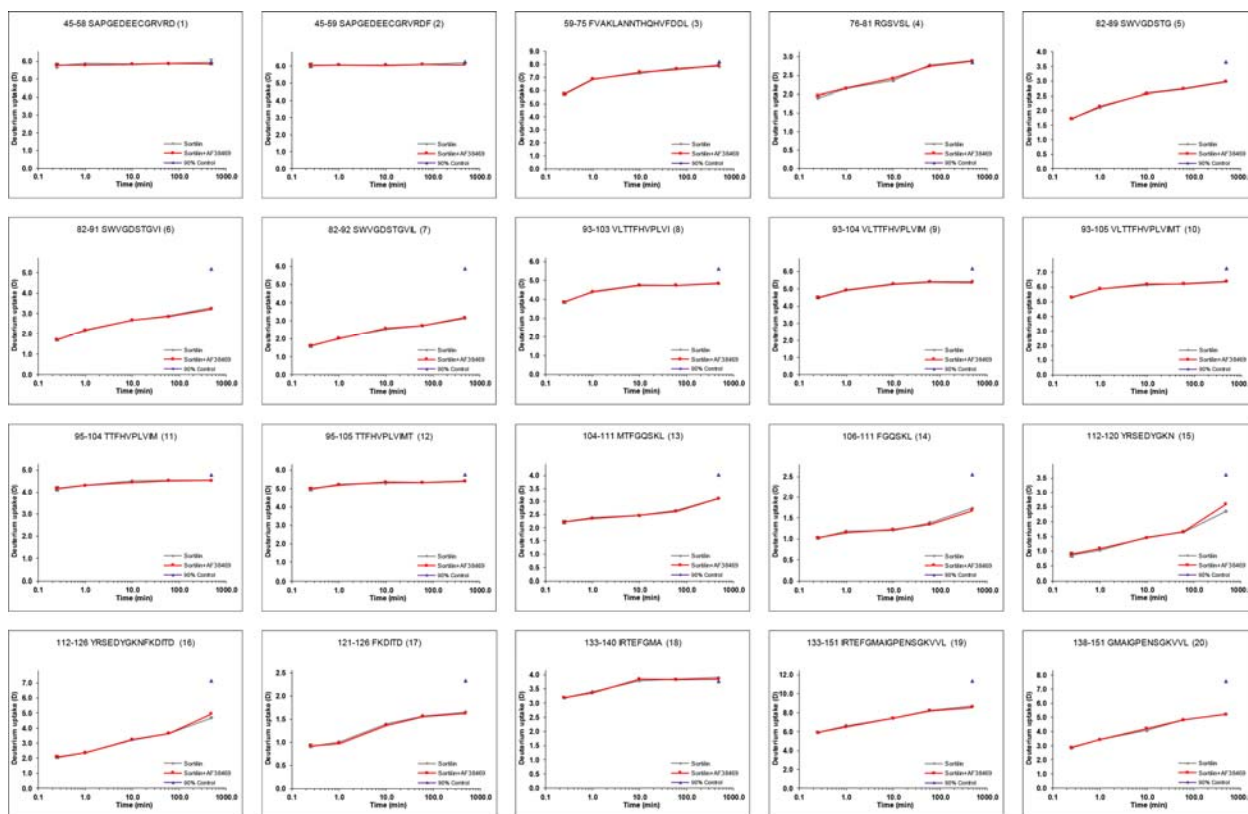

936

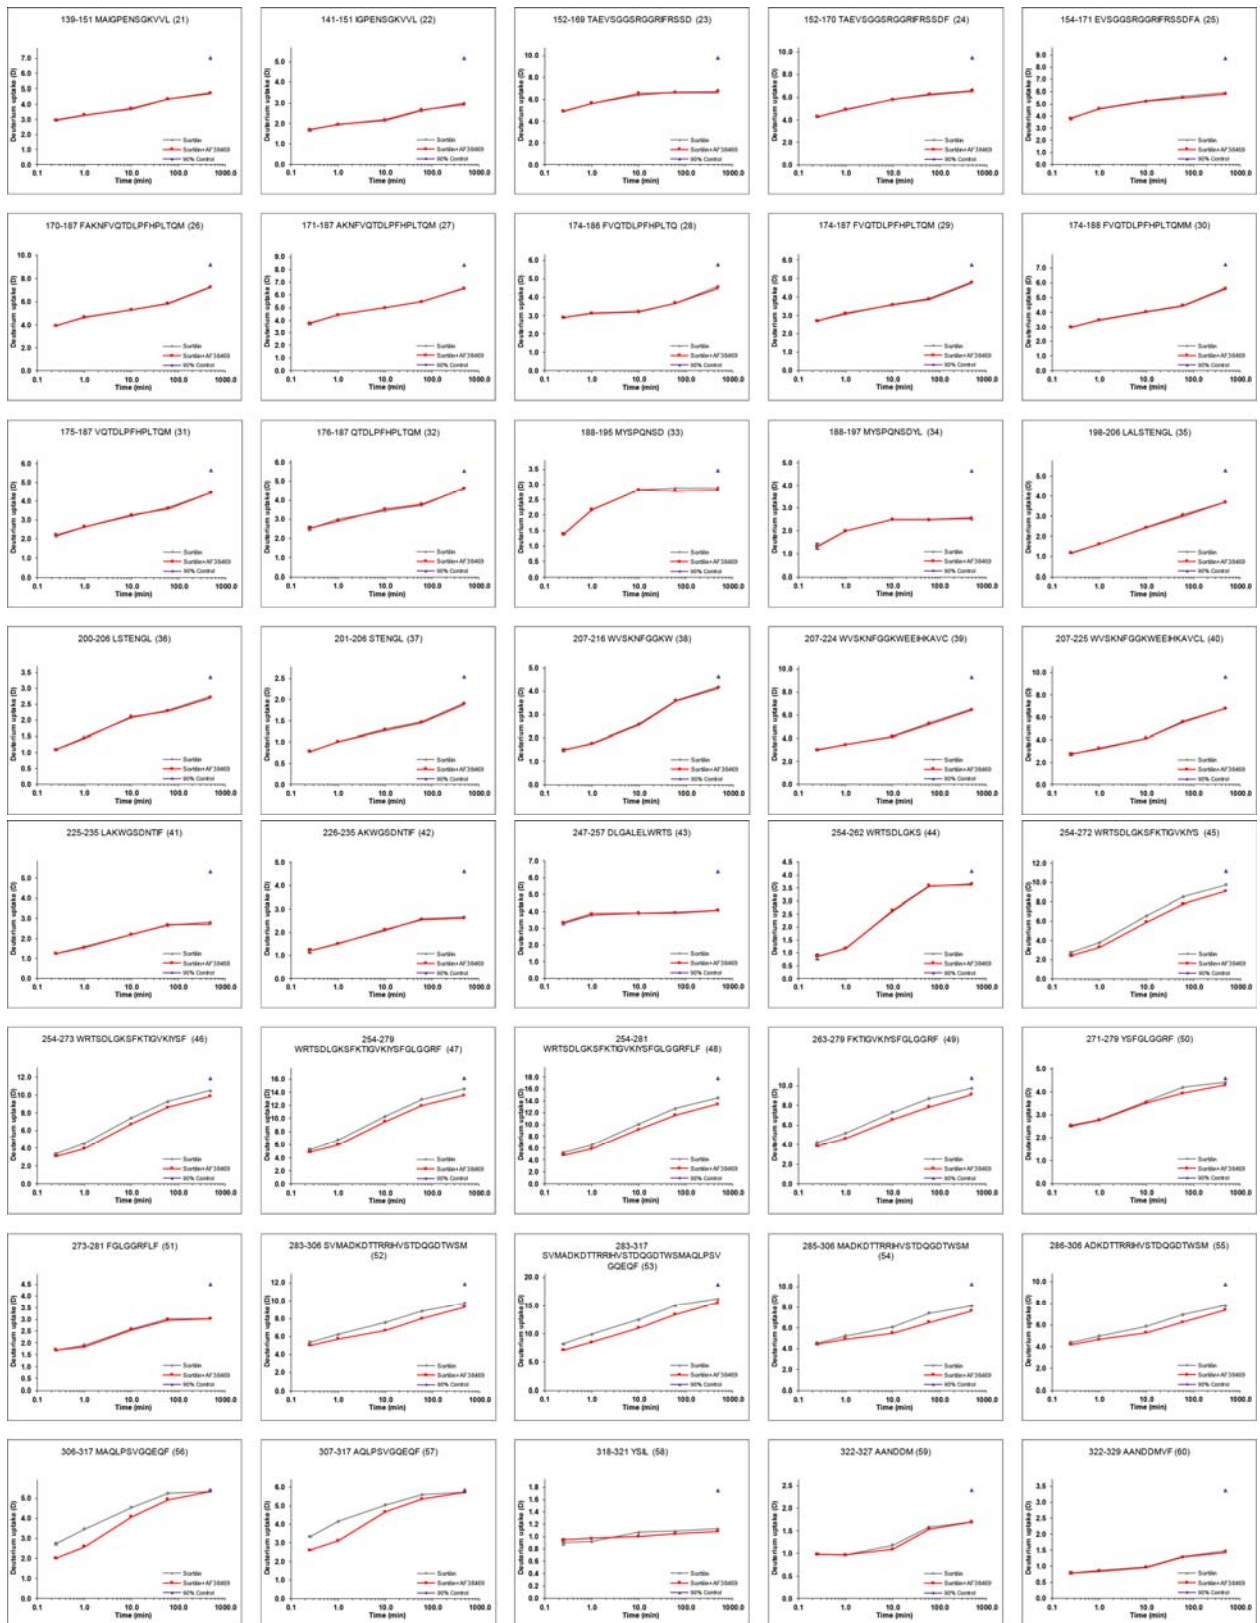



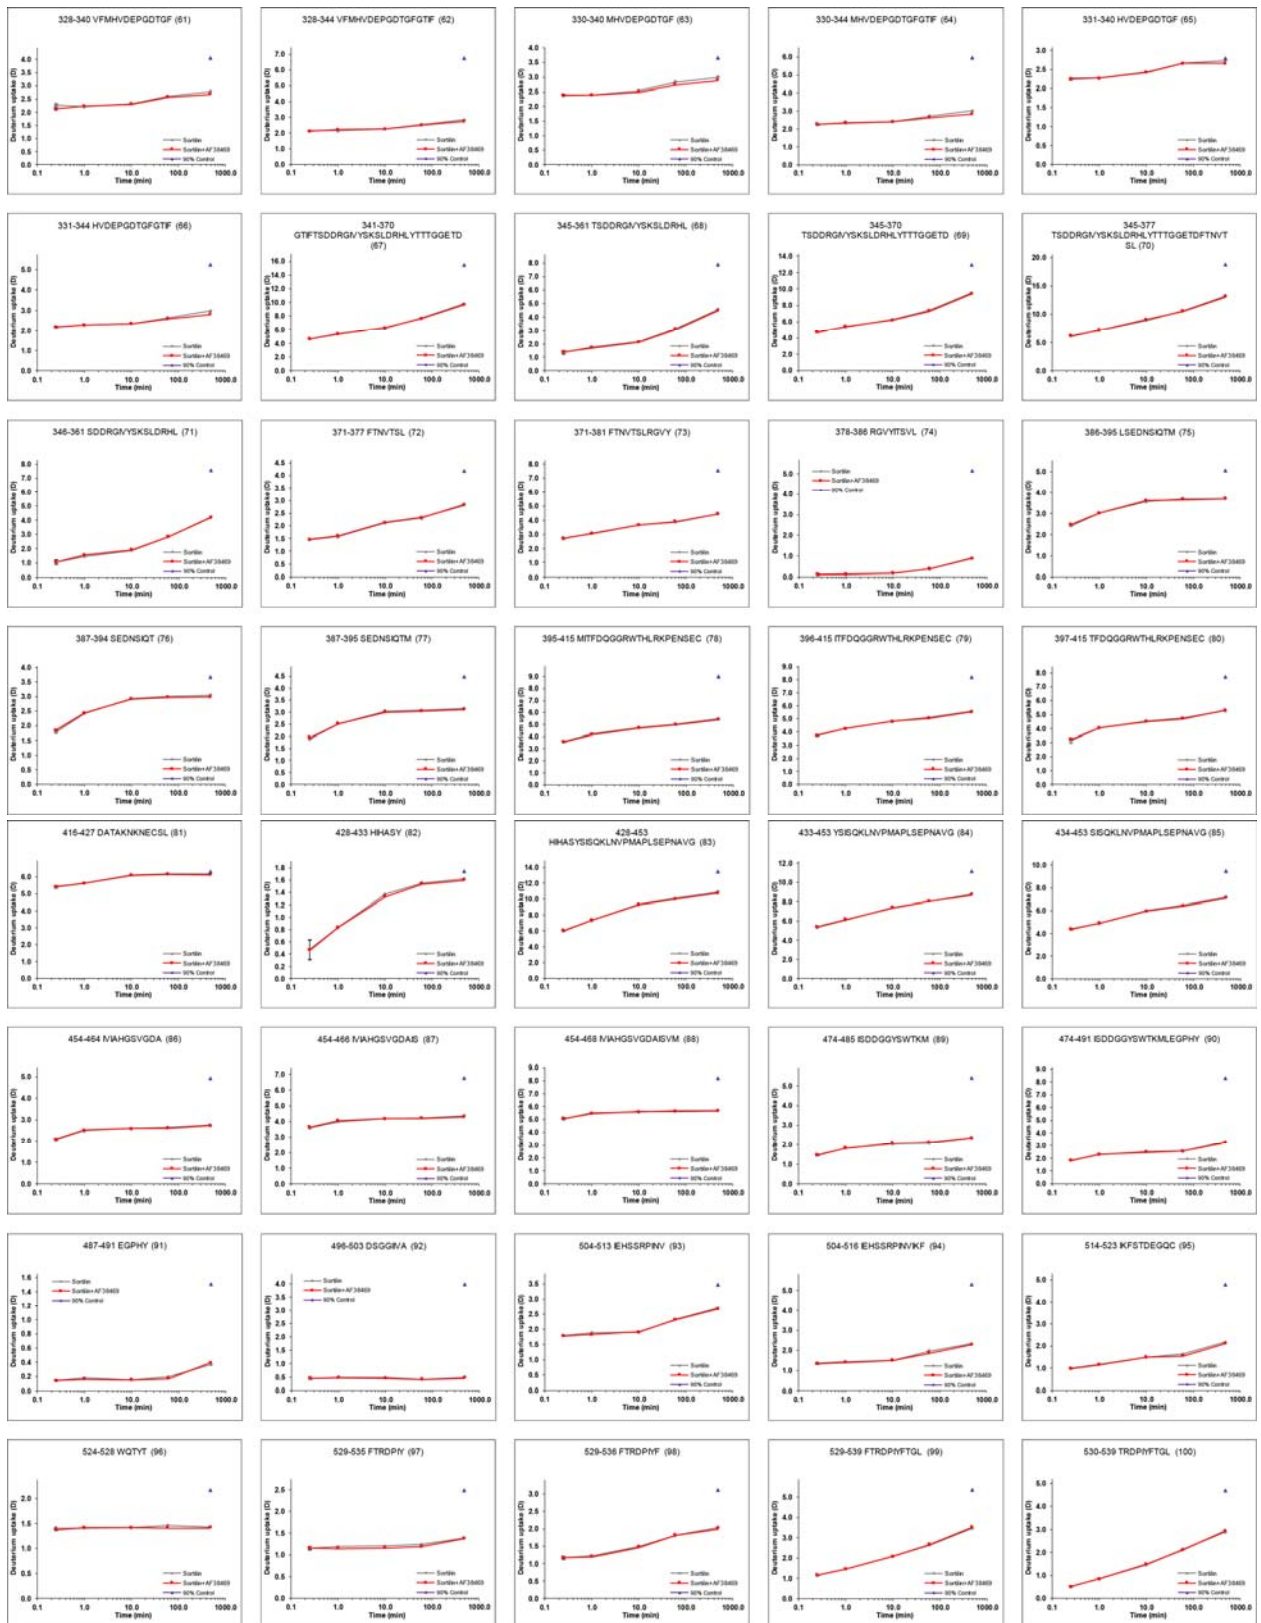

939

940

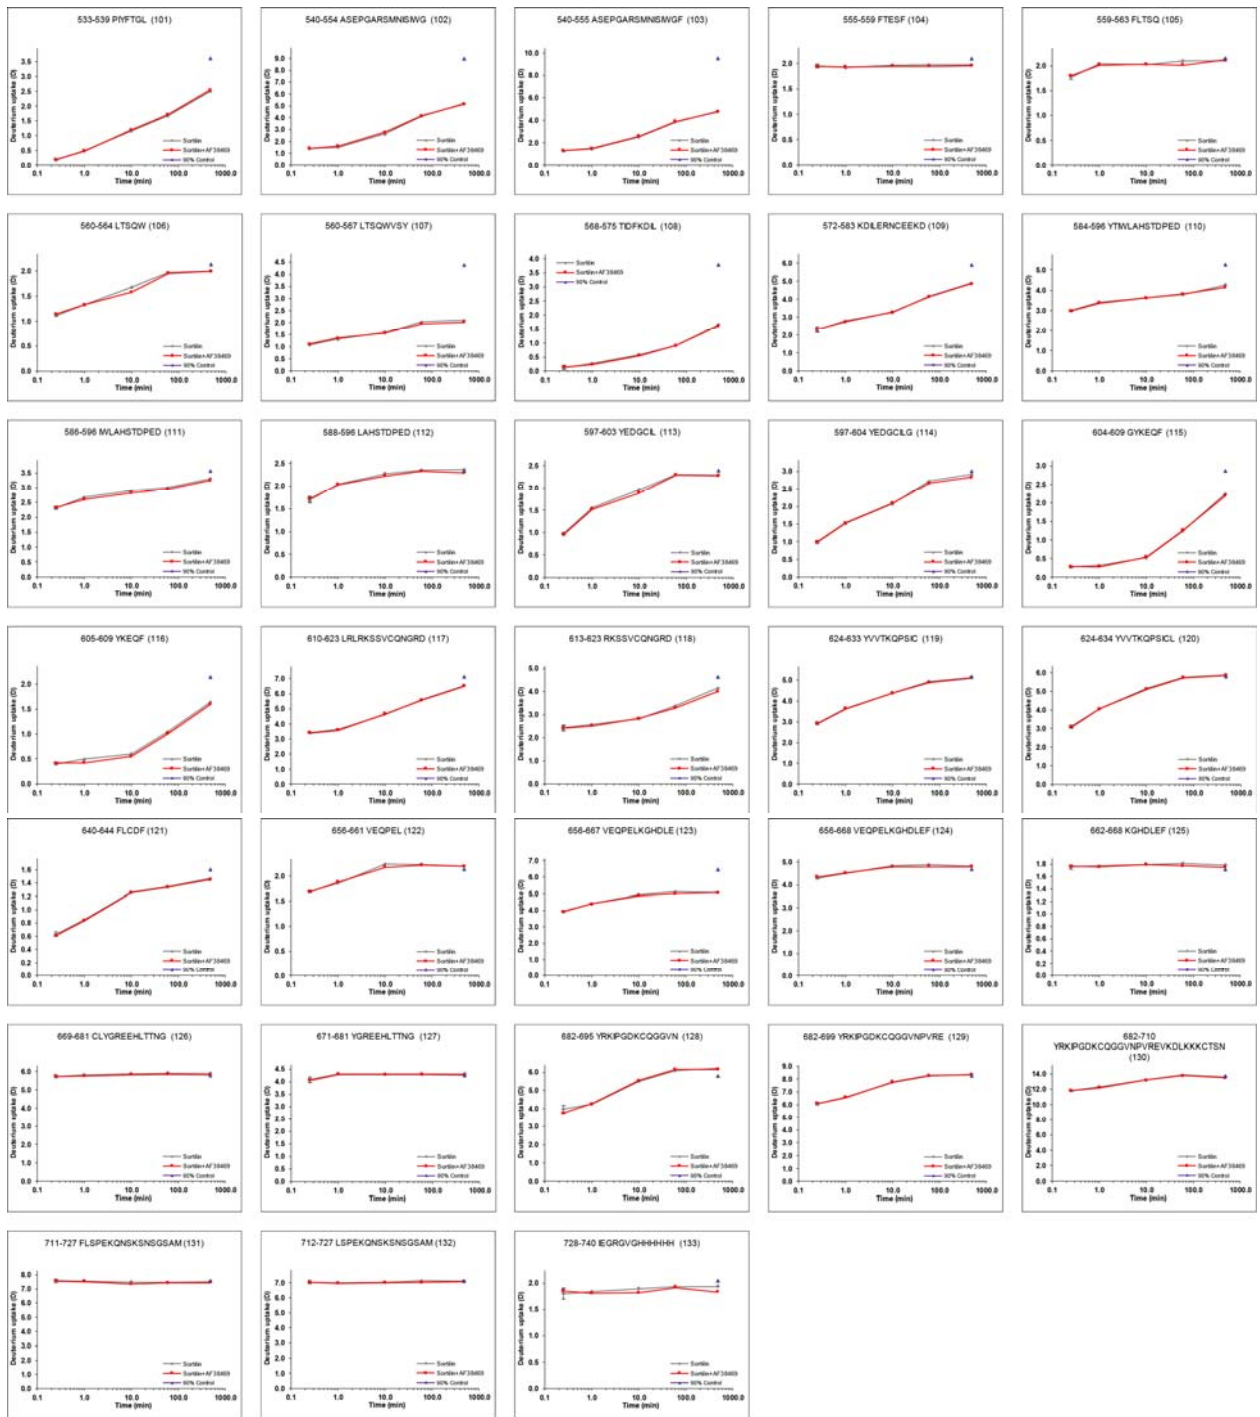

941

942

943

HDX plots of Sortilin in presence of proSort. Absolute deuterium incorporation is plotted as a function of time for Sortilin (gray lines) and Sortilin in presence of proSort (red lines). Equilibrium labelled (90%) Sortilin control samples are plotted as filled purple triangles at the 8h time point. SD is plotted as error bars (are only slightly visible). (n=3 for the 1min and 1h time points and the equilibrium labelled sample. n=1 for the 15s, 10min and 8h time points).

944

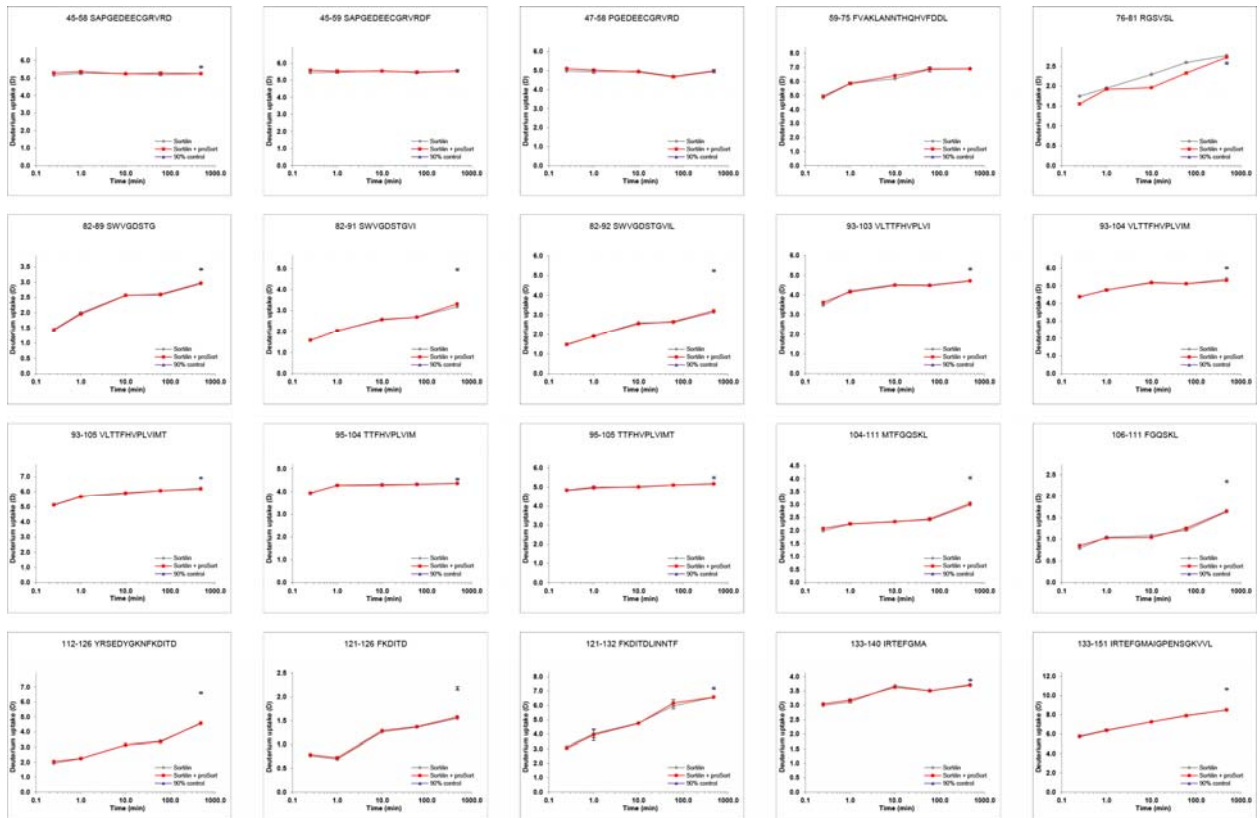

945

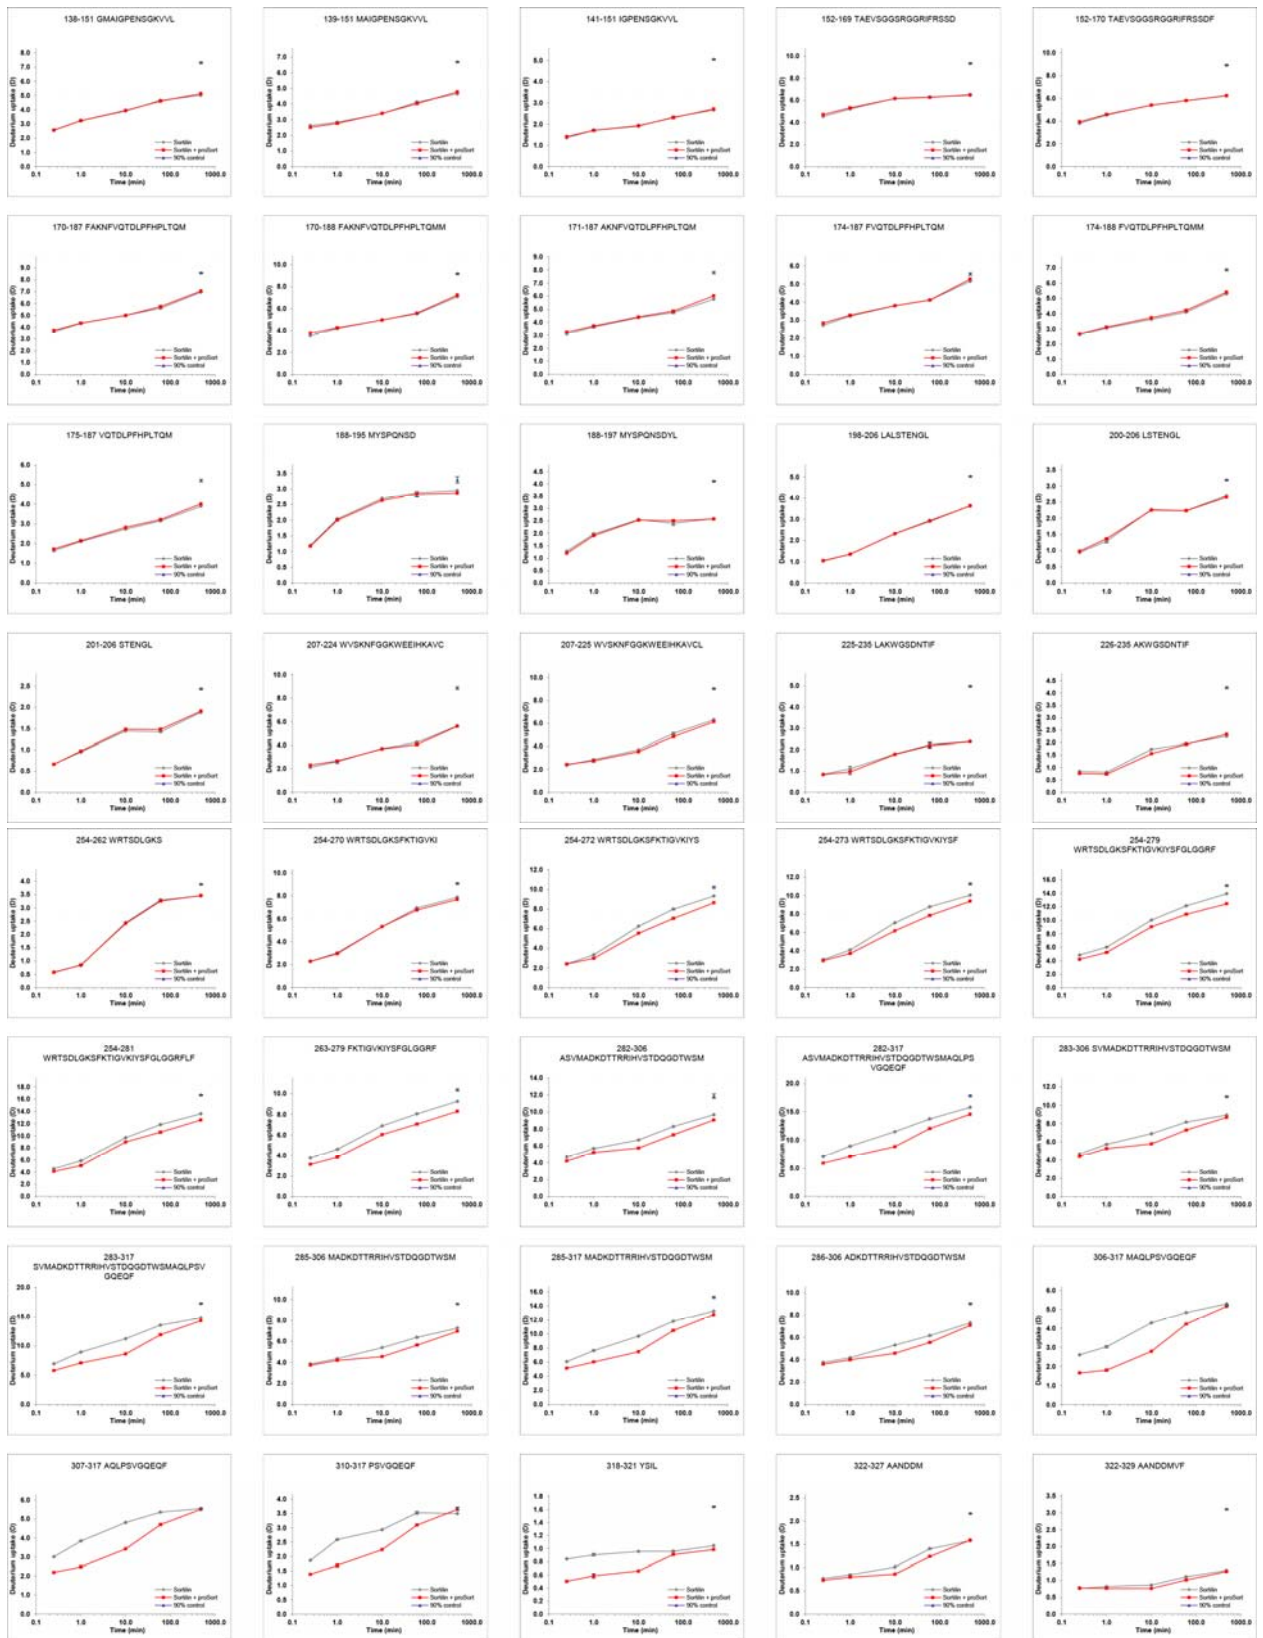

946

947



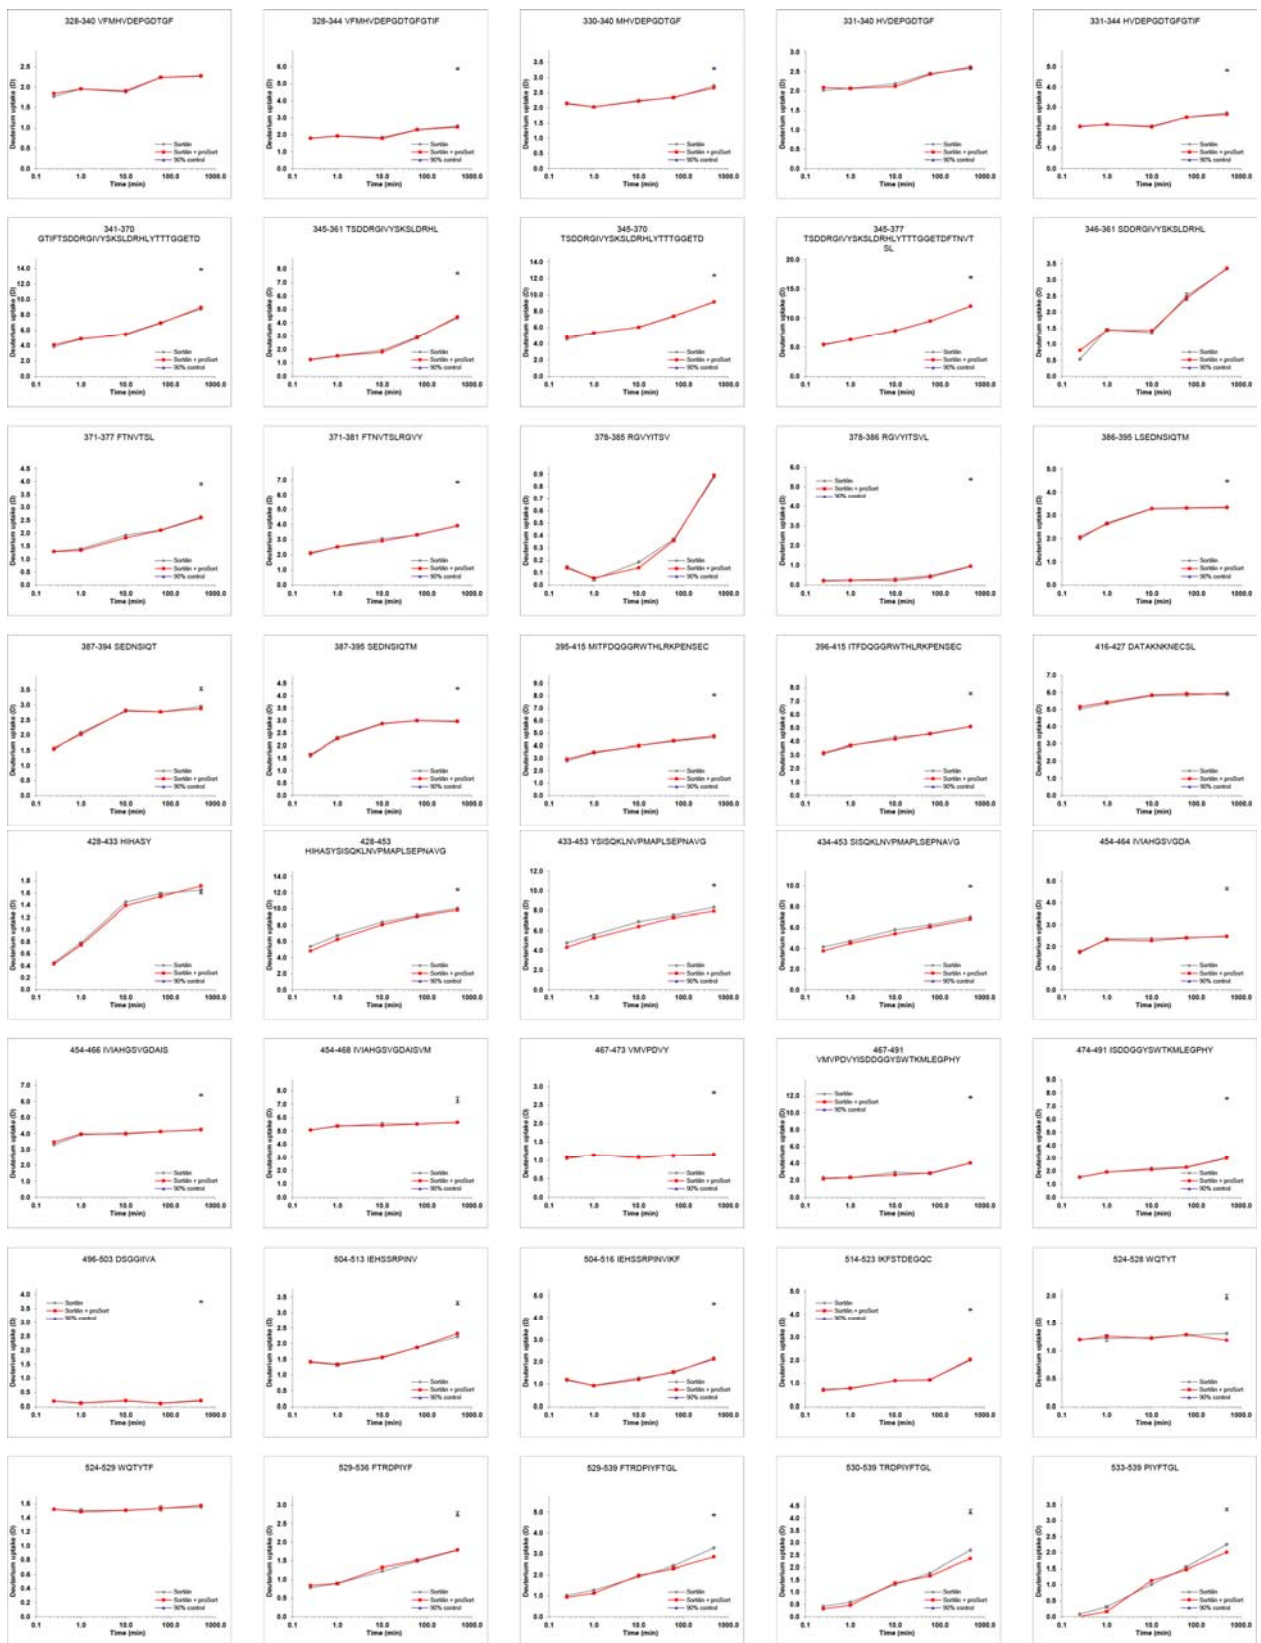

948

949



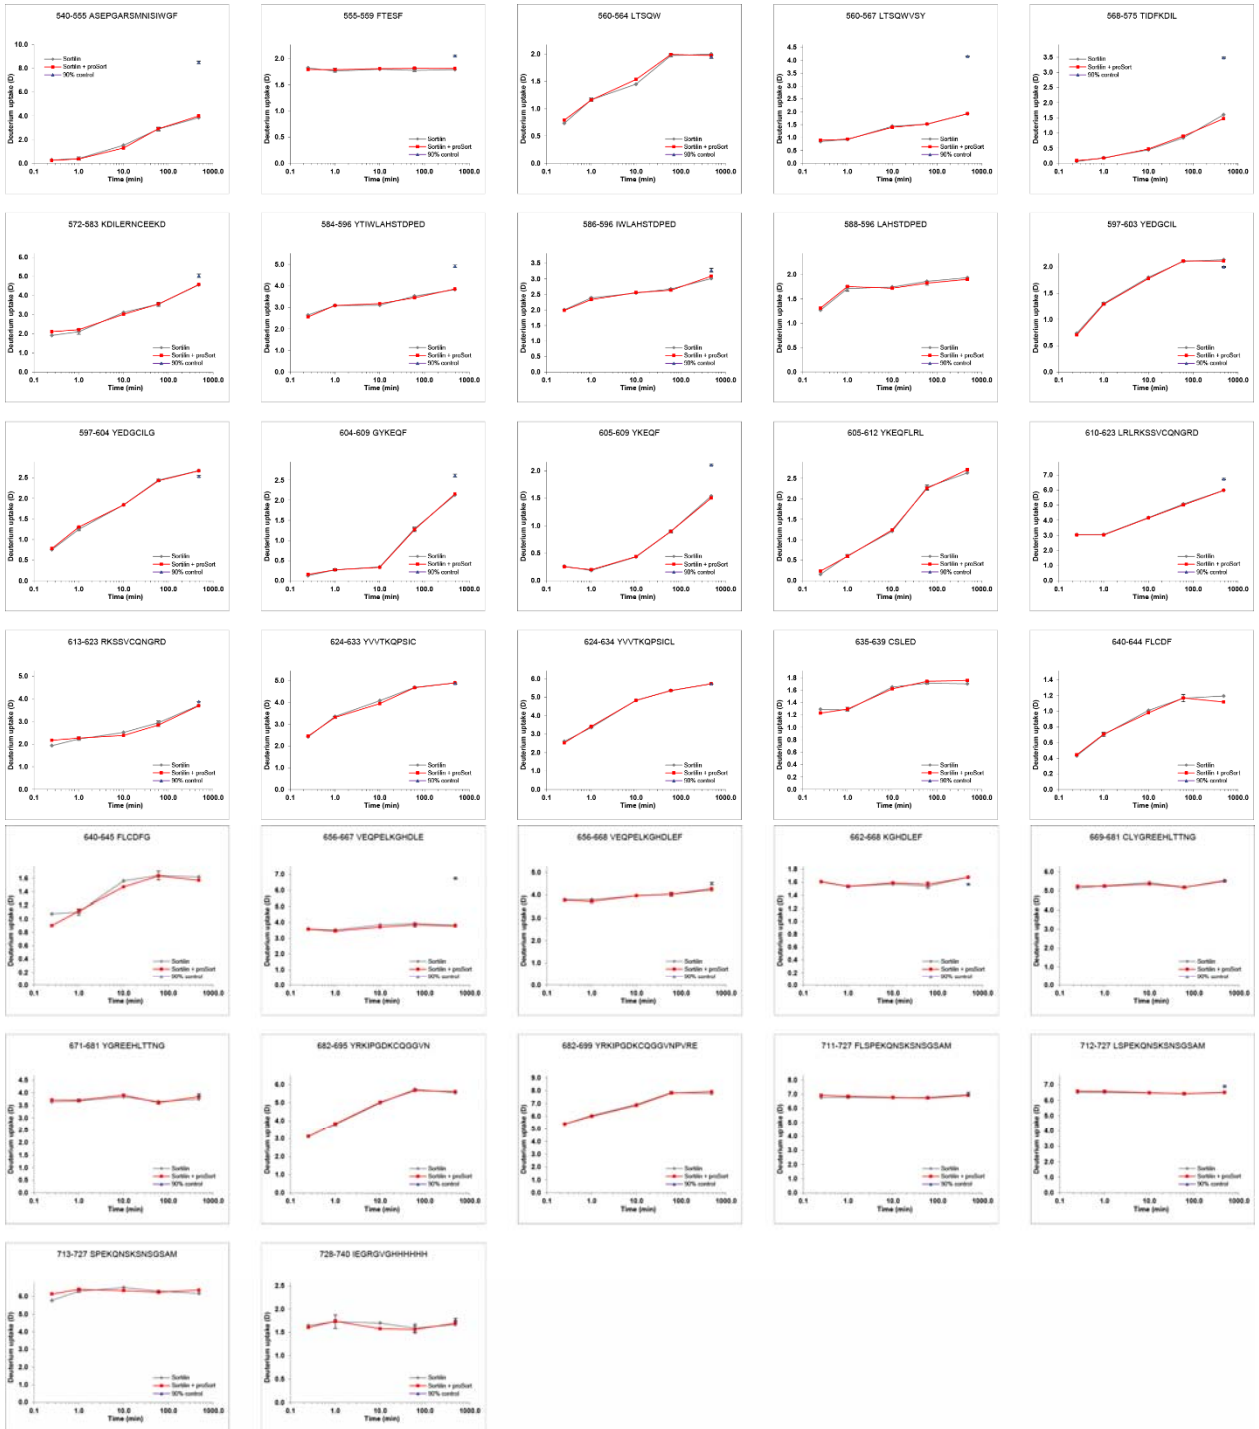

HDX plots of proSort in presence of Sortilin. Absolute deuterium incorporation is plotted as a function of time for proSort (gray lines) and proSort in presence of Sortilin (red lines). Equilibrium labelled (90%) proSort control samples are plotted as filled purple triangles circles at the 1h time point. SD is plotted as error bars (are only slightly visible). (n=1 for all time points, except the 10s time point, where n=4)

953

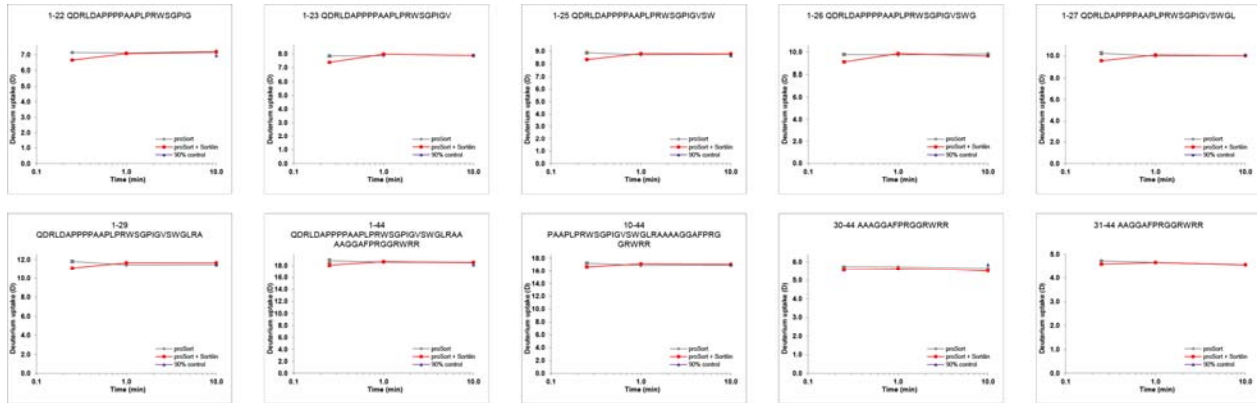

954

955

HDX plots of Sortilin in presence of proNGF. Absolute deuterium incorporation is plotted as a function of time for Sortilin (gray lines) and Sortilin in presence of proNGF (red lines). Equilibrium labelled (90%) Sortilin control samples are plotted as filled purple triangles at the 8h time point. SD is plotted as error bars (are only slightly visible). (n=3 for the 15s, 1min and 10min time points and the equilibrium labelled sample. n=1 for the 1h and 8h time points).

956

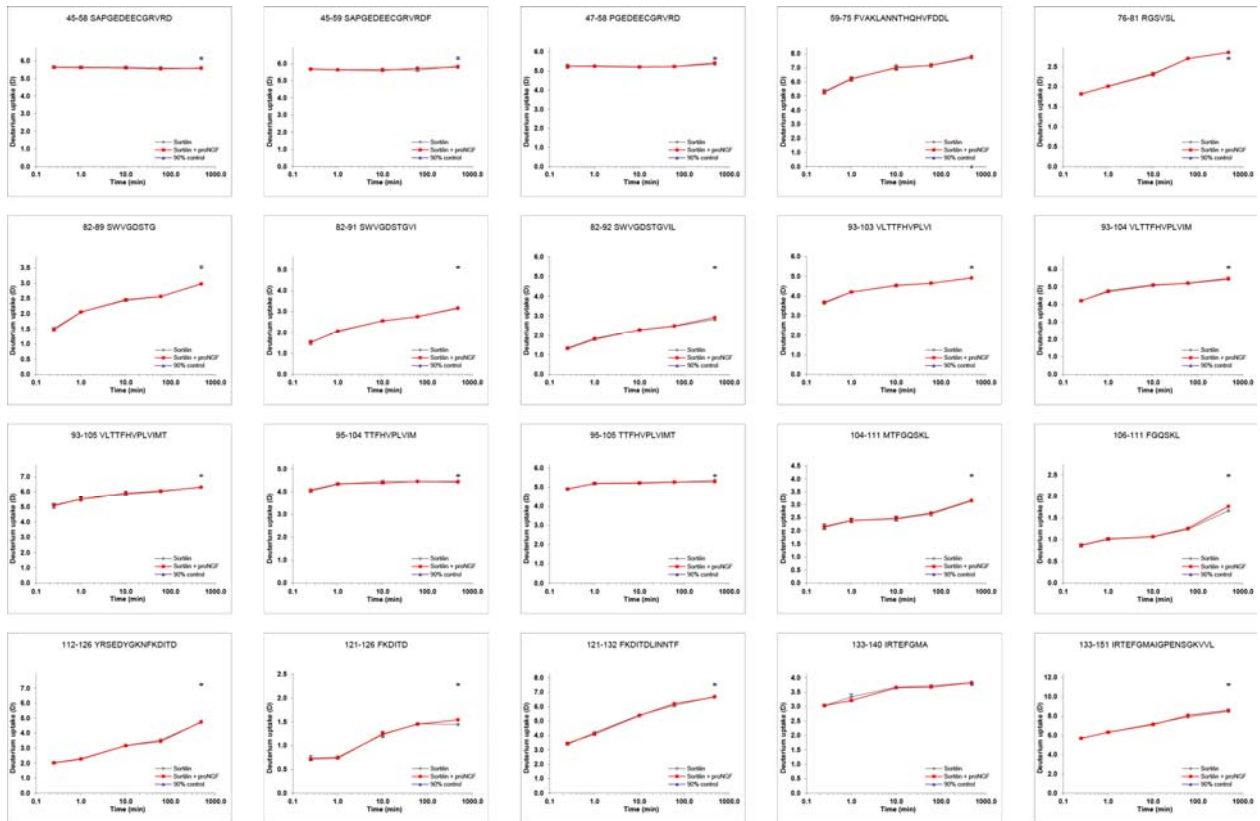

957

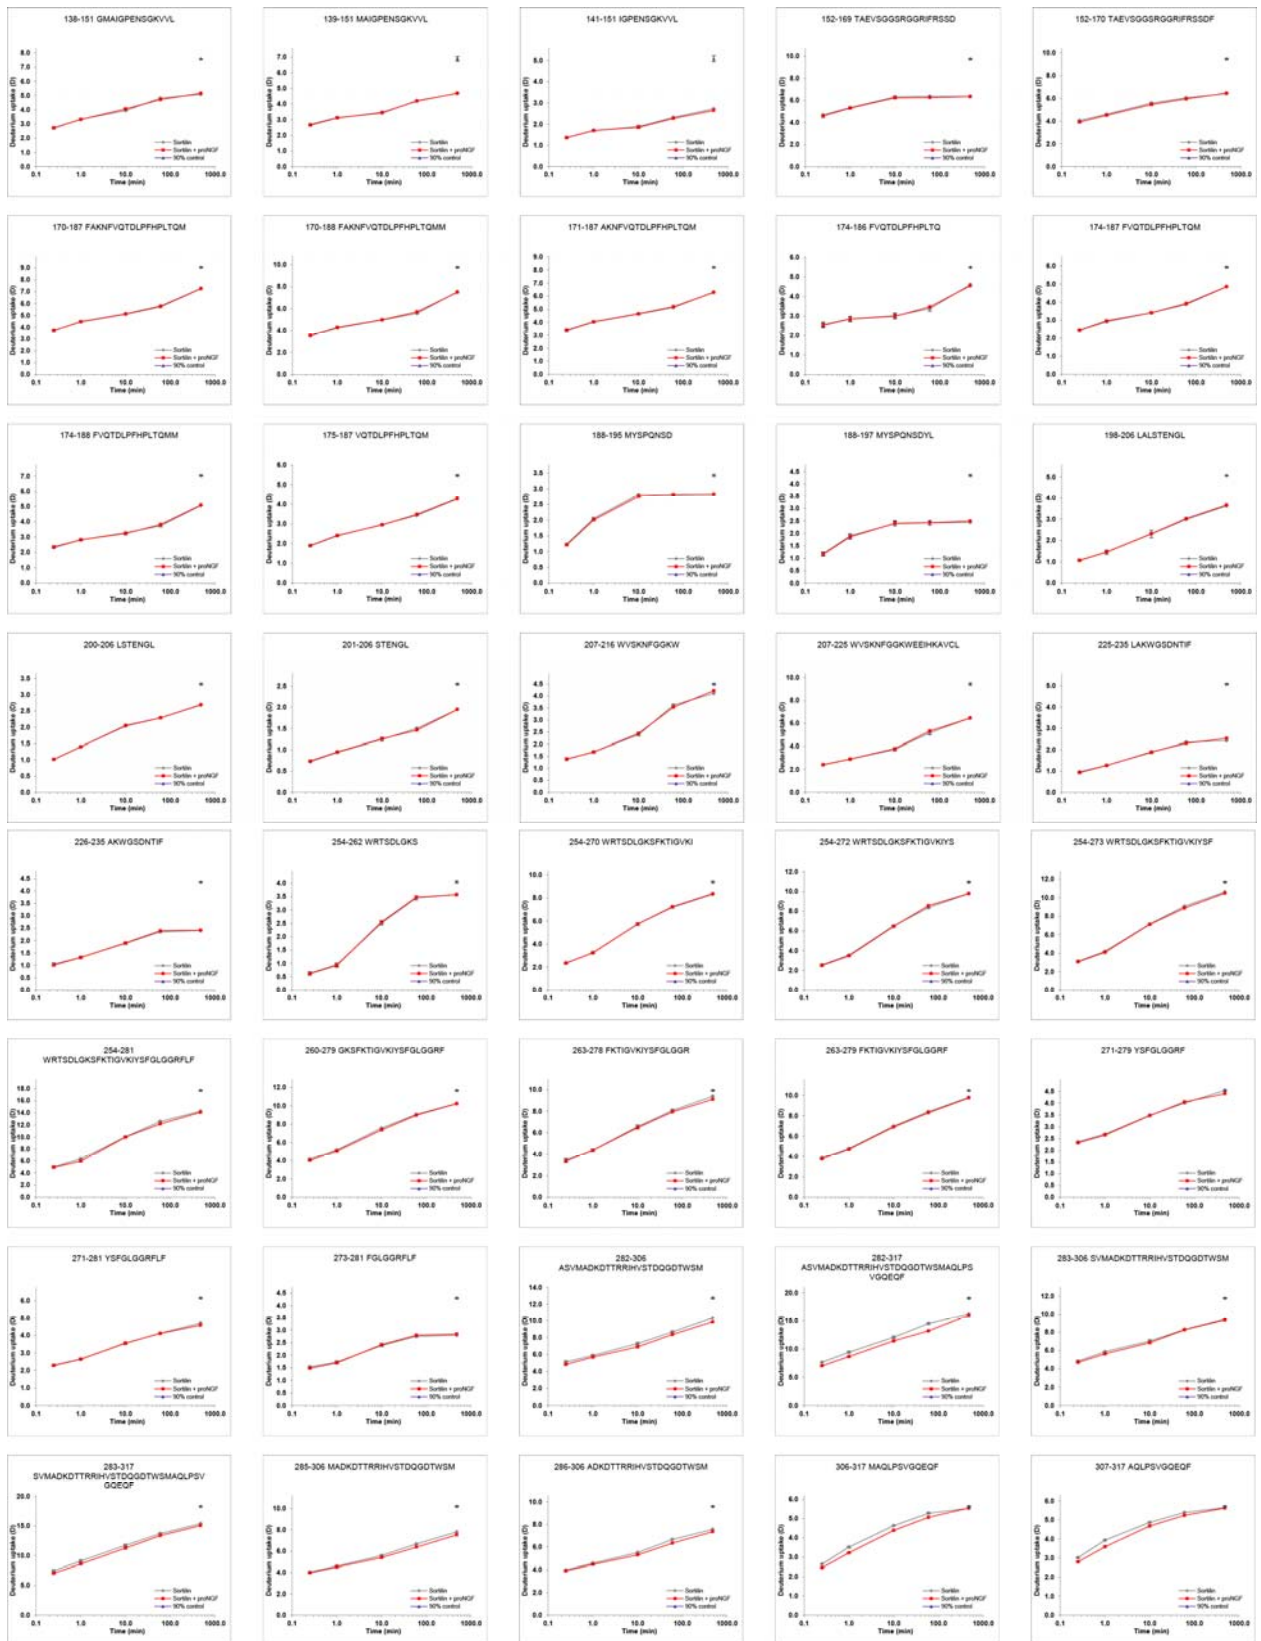

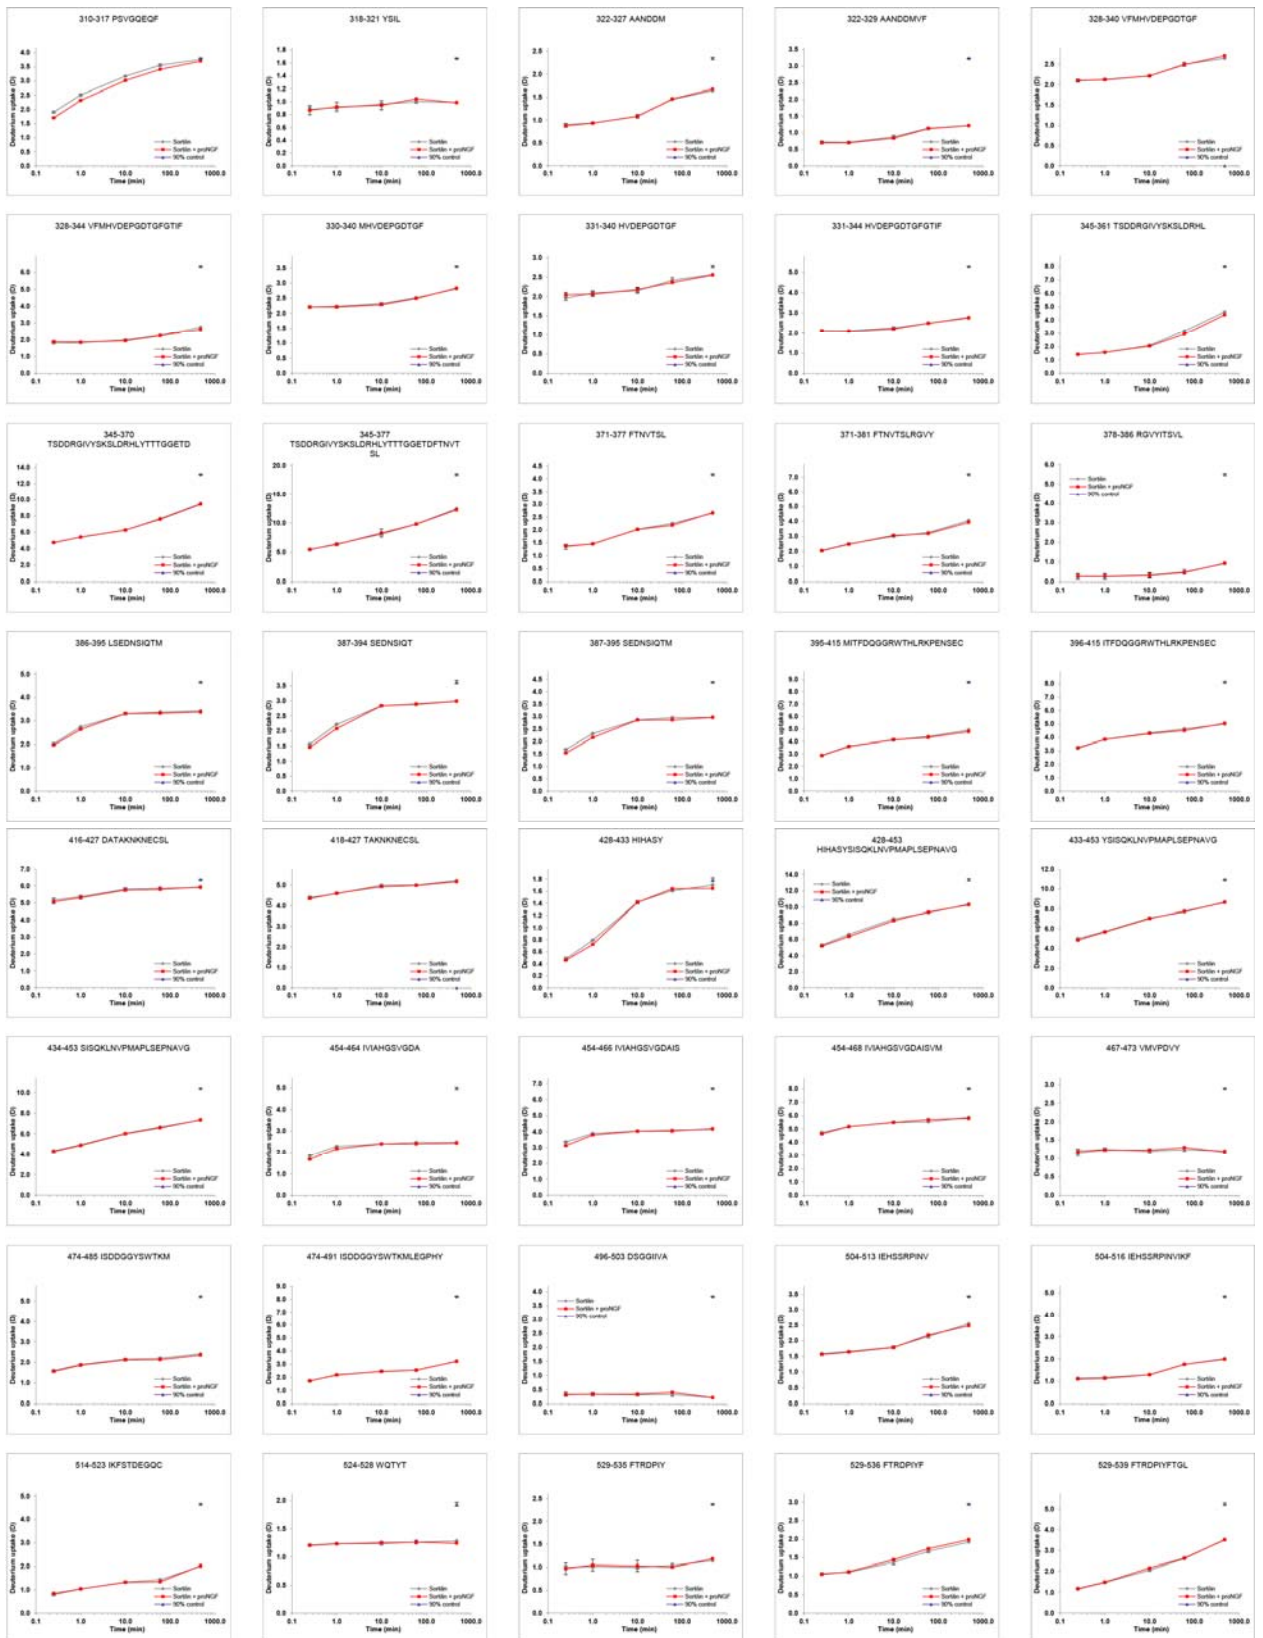

960

961



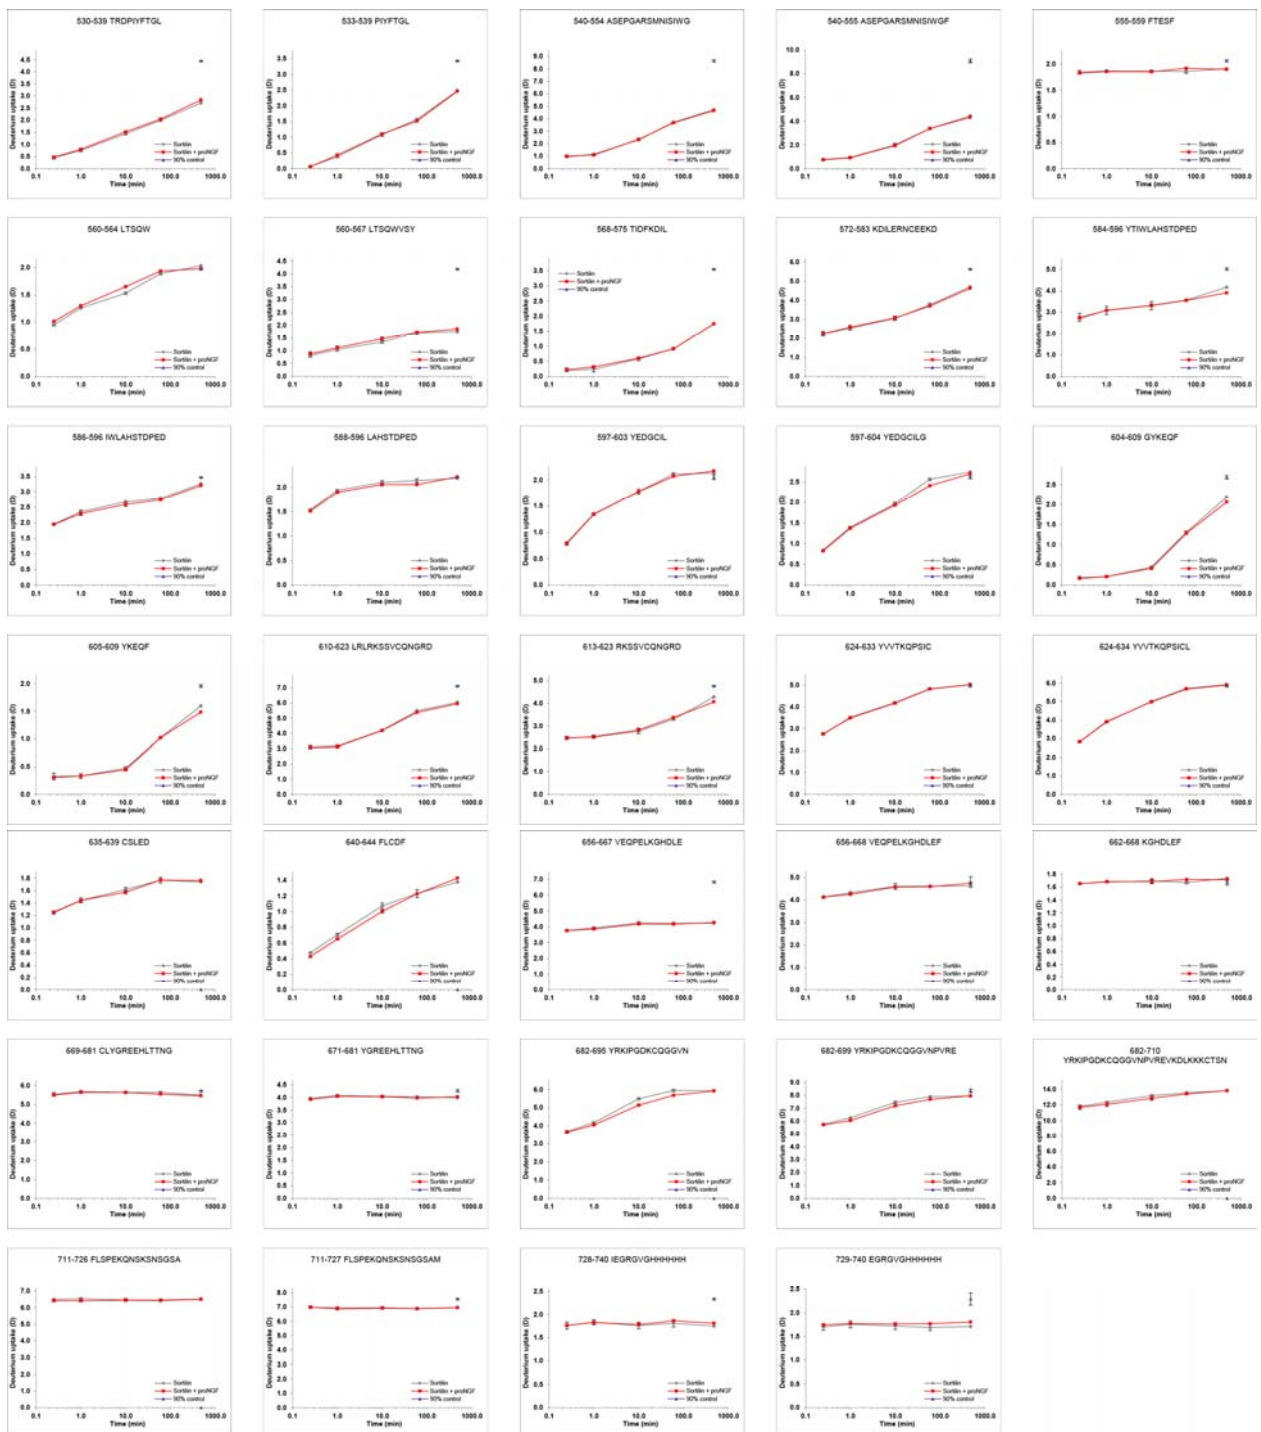

962

963

964

HDX plots of Sortilin in presence of GSTpro. Absolute deuterium incorporation is plotted as a function of time for Sortilin (gray lines) and Sortilin in presence of GSTpro (red lines). Equilibrium labelled (90%) Sortilin control samples are plotted as filled purple triangles at the 8h time point. SD is plotted as error bars (are only slightly visible). (n=3 for the 15s, 1min and 8h time points and the equilibrium labelled sample. n=1 for the 10min and 1h time points).

965

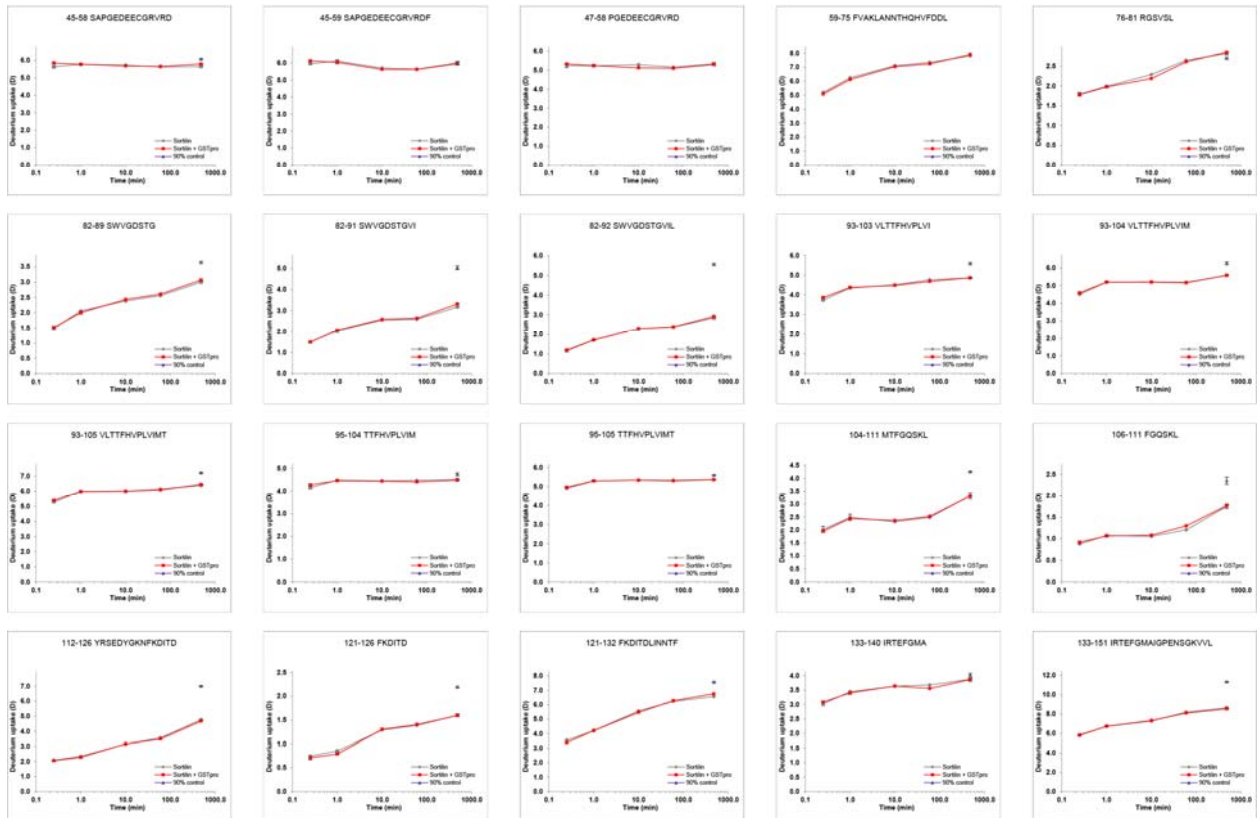

966

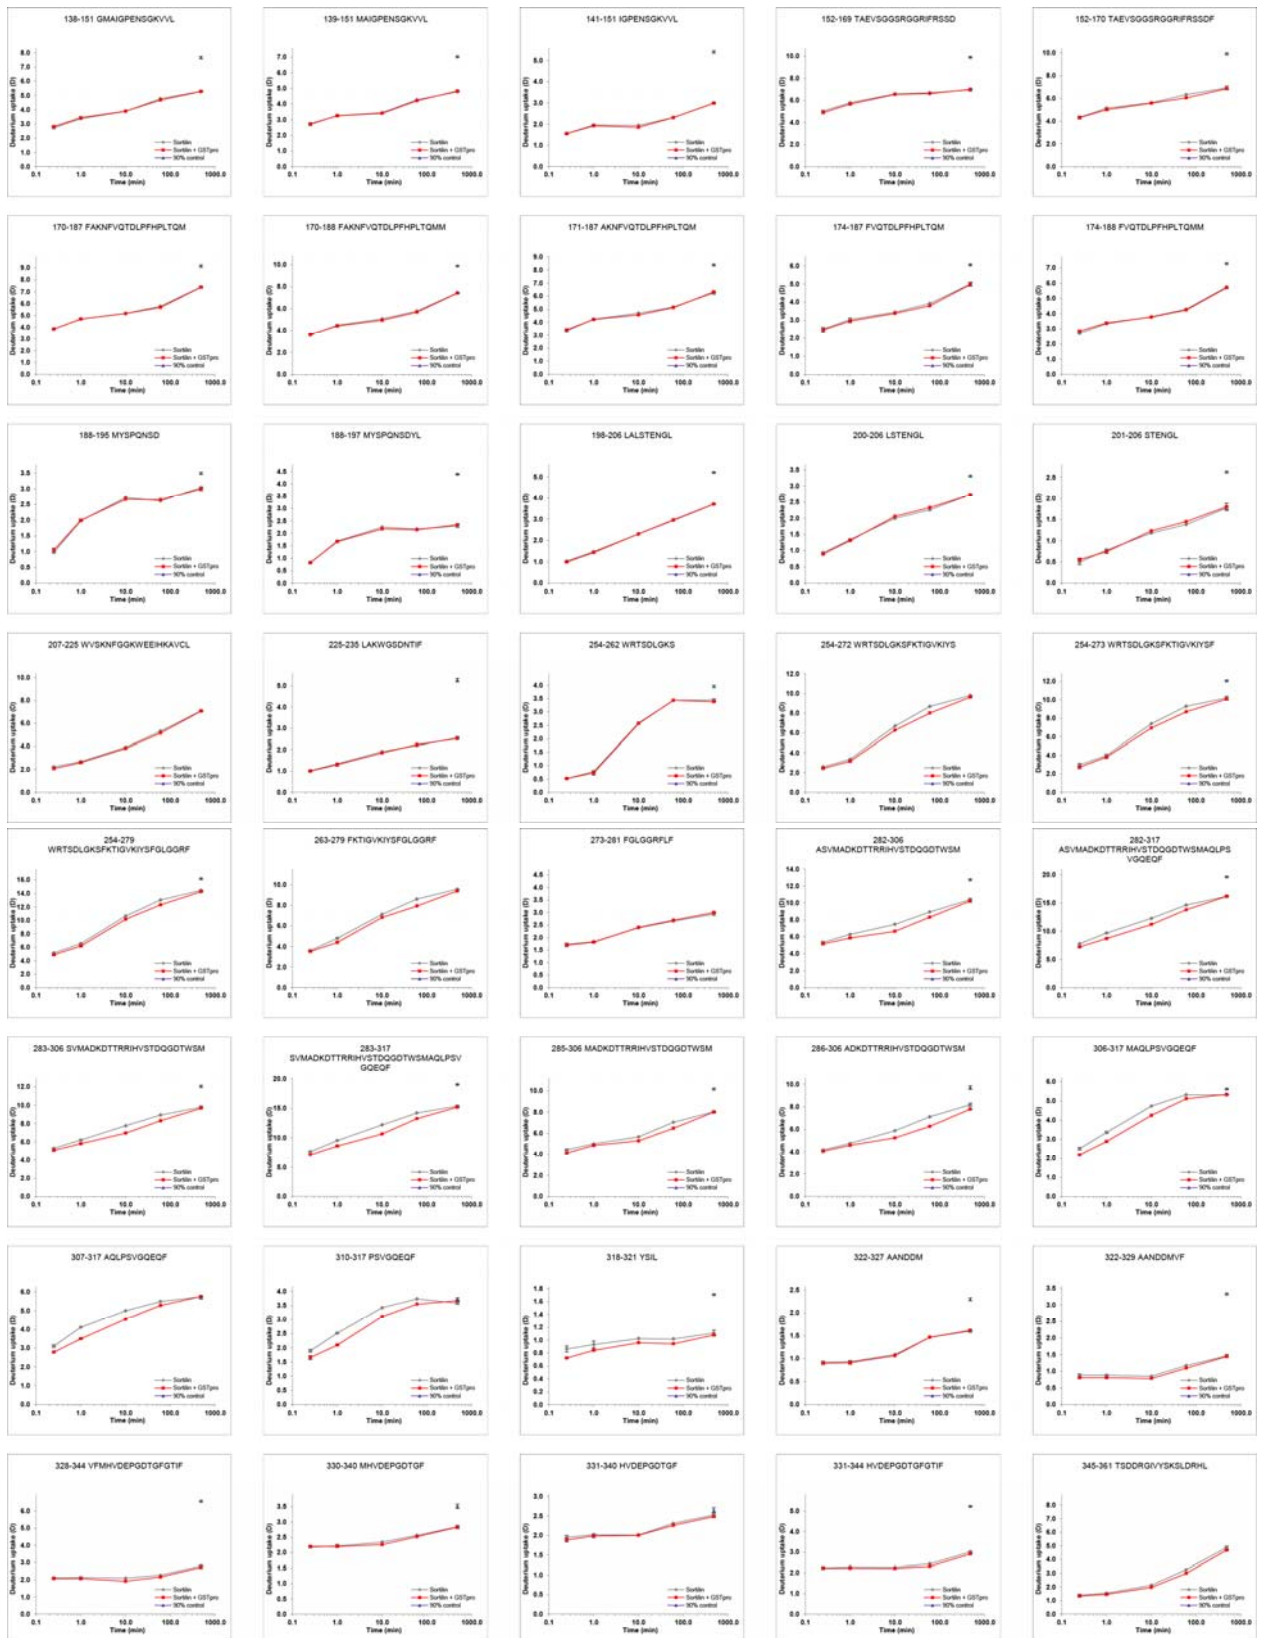

967

968

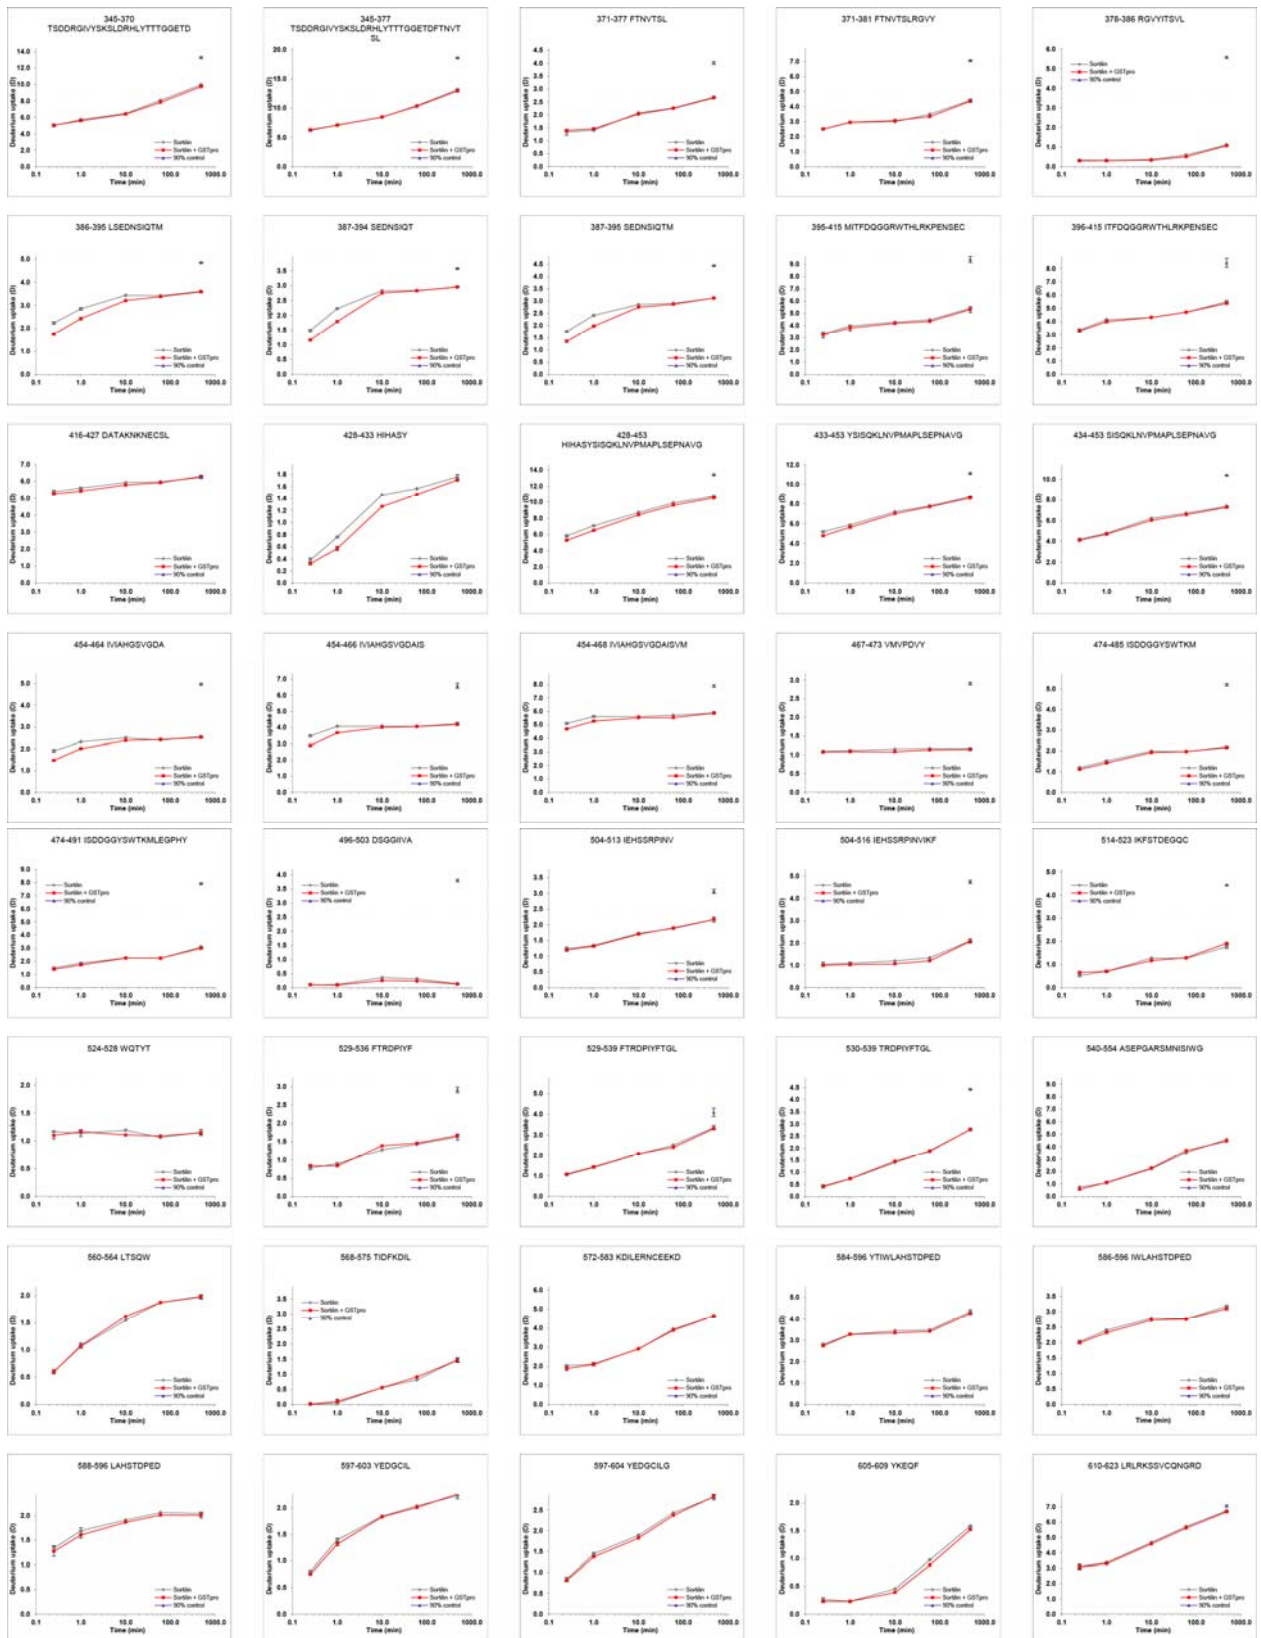

969

970

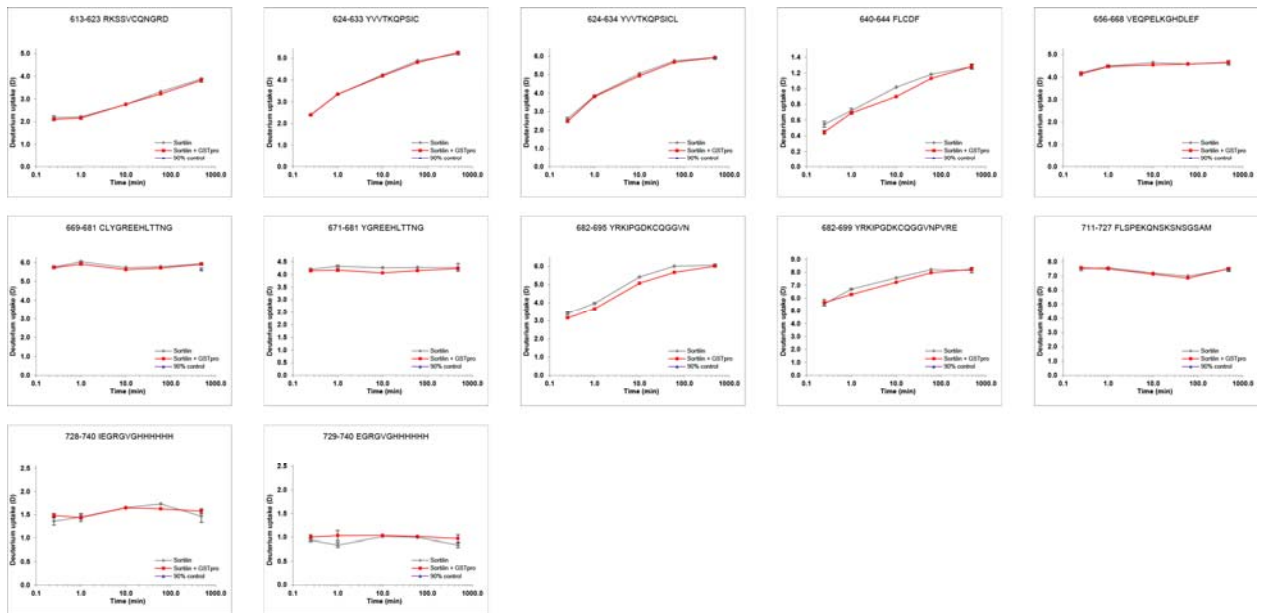

971

972



HDX plots of Sortilin in presence of GST. Absolute deuterium incorporation is plotted as a function of time for Sortilin (gray lines) and Sortilin in presence of GST (red lines). Equilibrium labelled (90%) Sortilin control samples are plotted as filled purple triangles at the 8h time point. SD is plotted as error bars (are only slightly visible). (n=3 for the 1min and 1h time points and the equilibrium labelled sample. n=1 for the 15s, 10min and 8h time points).

973

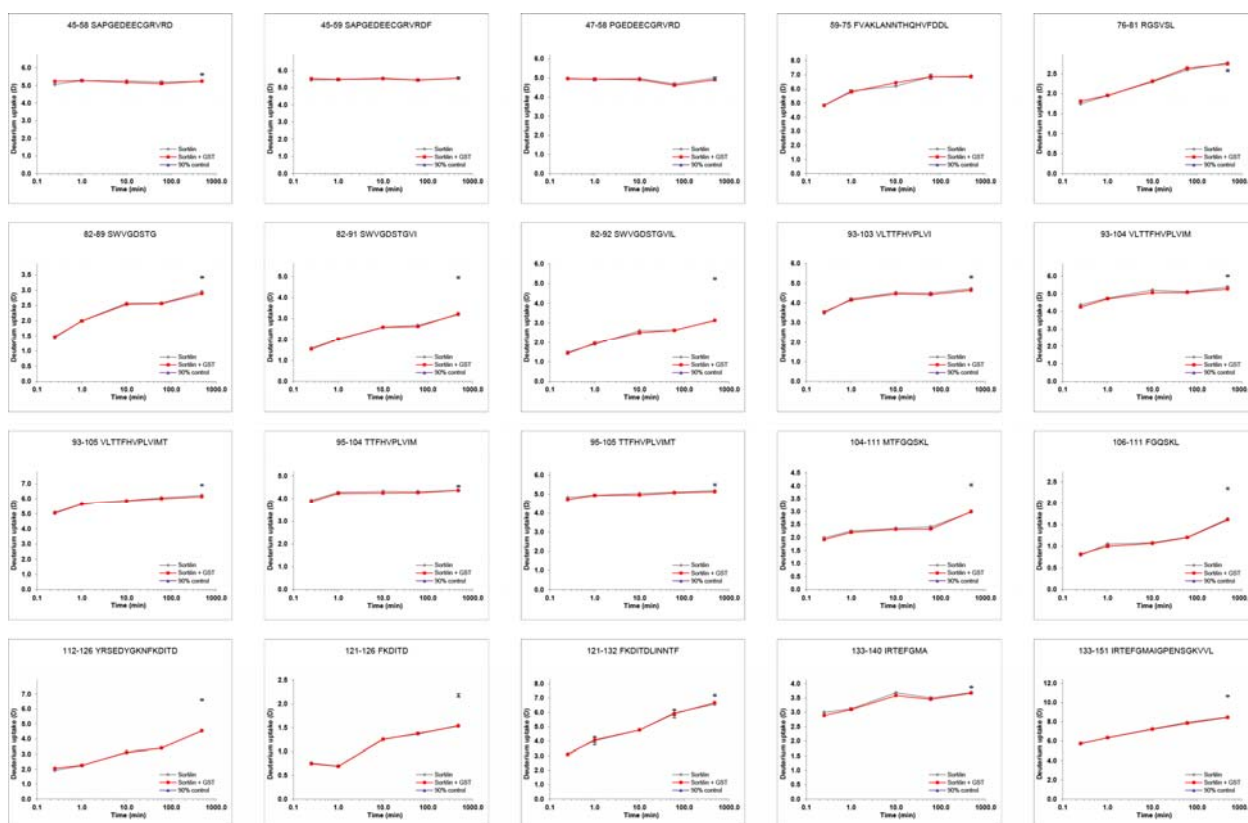

974

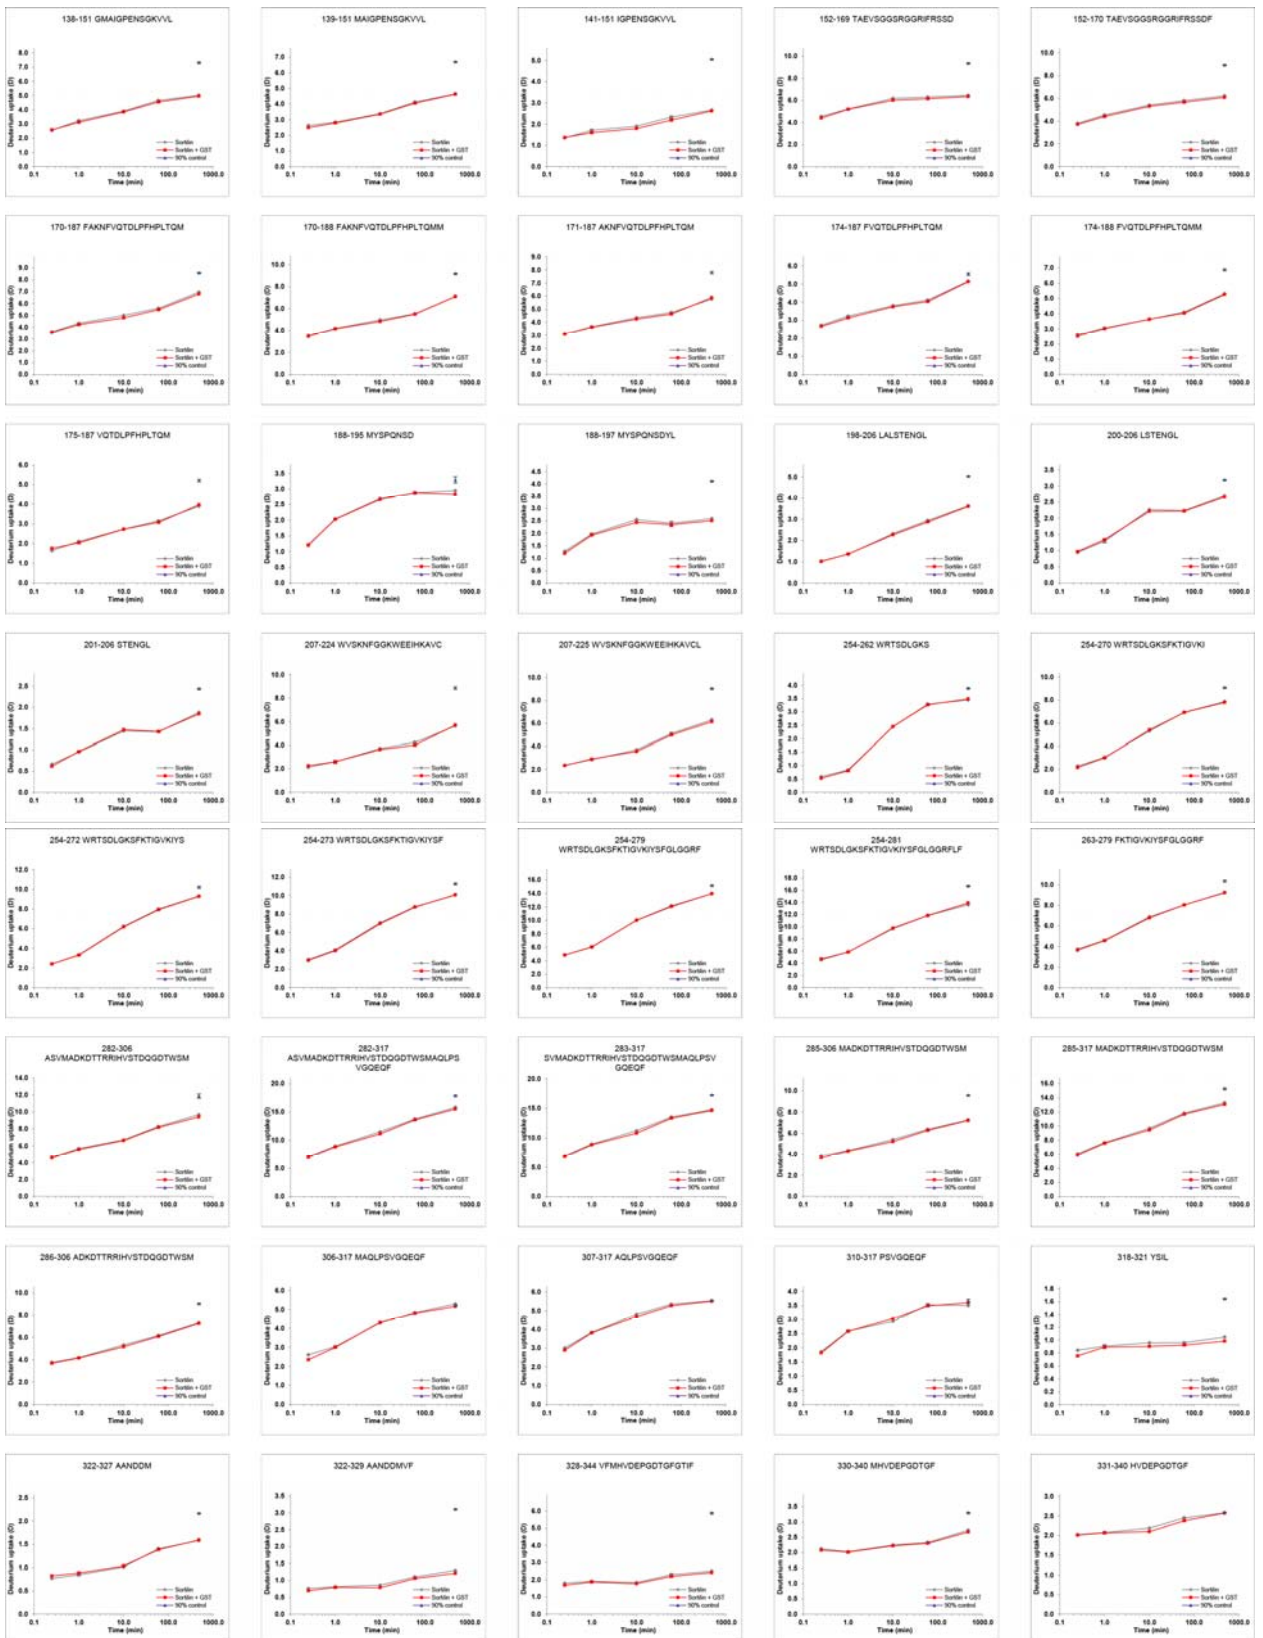

975

976

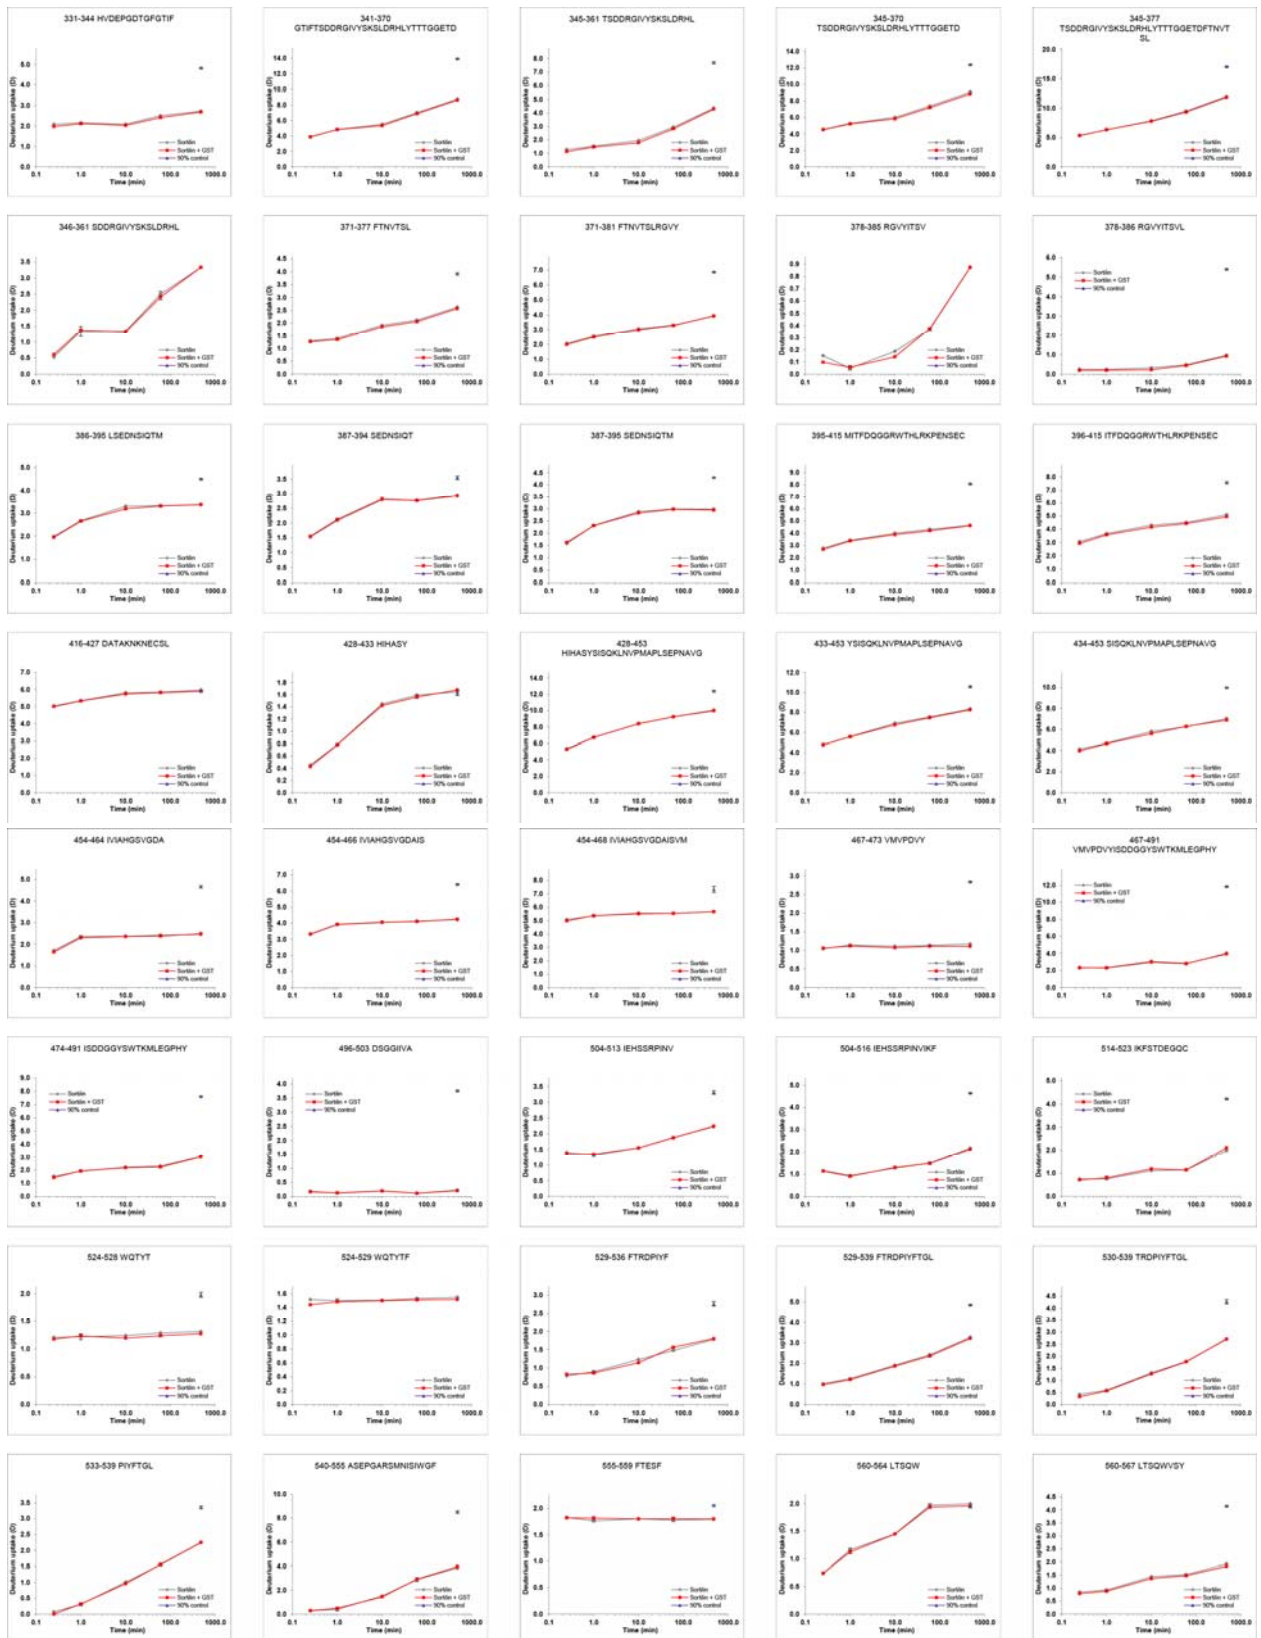

977

978

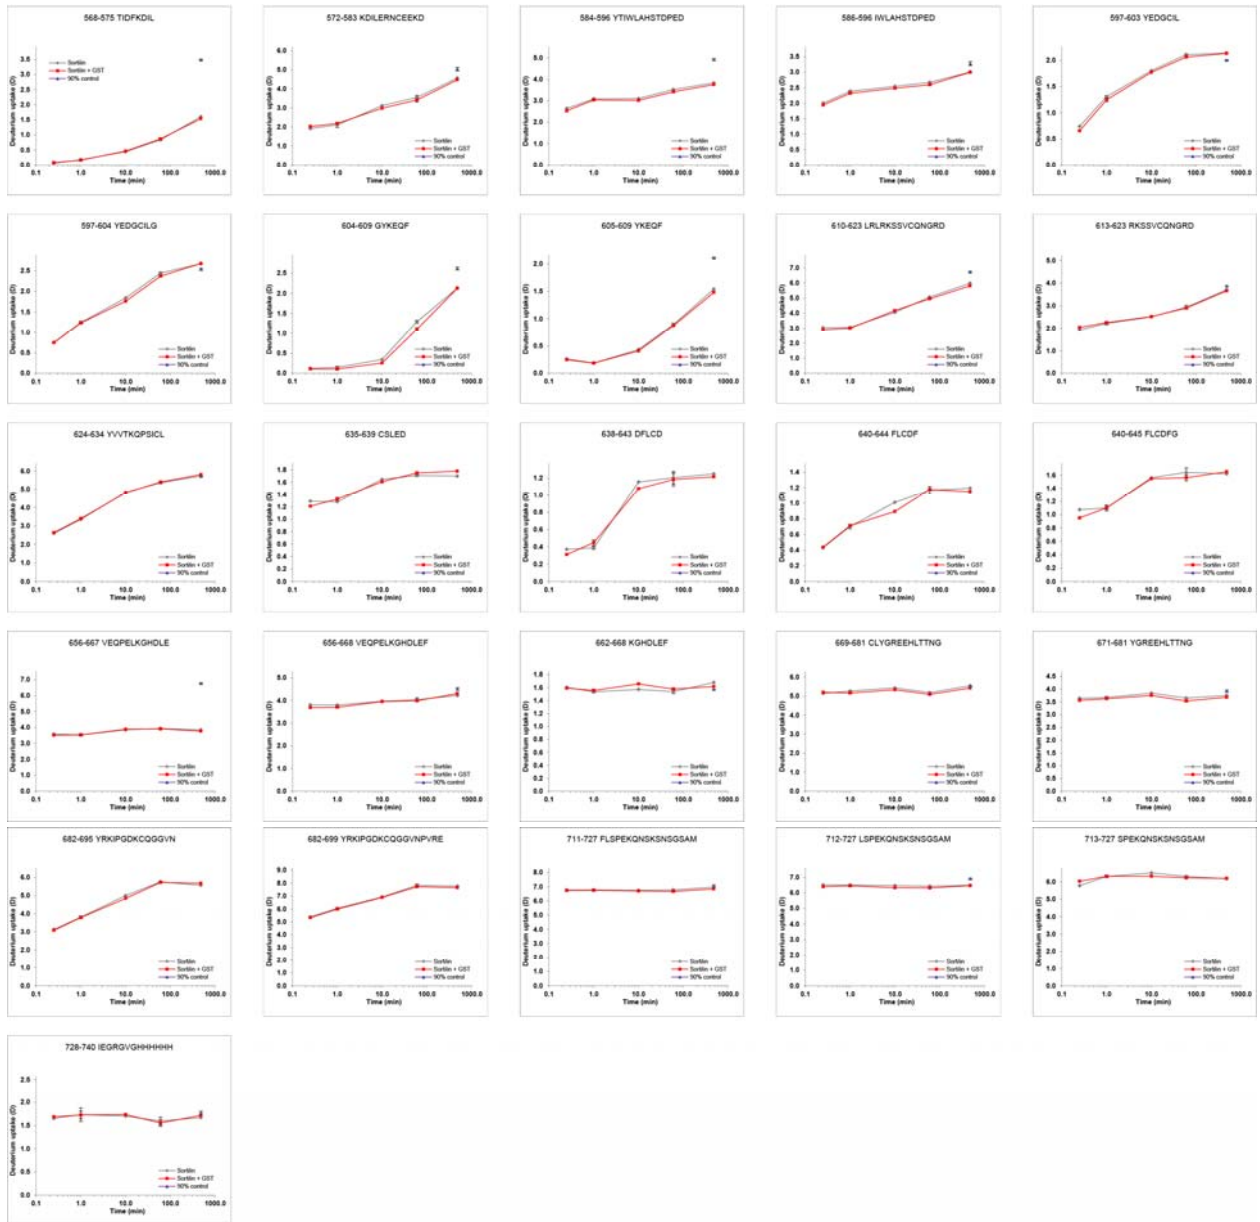

979

980

981



HDX plots of Sortilin in presence of NGF. Absolute deuterium incorporation is plotted as a function of time for Sortilin (gray lines) and Sortilin in presence of NGF (red lines). Equilibrium labelled (90%) Sortilin control samples are plotted as filled purple triangles at the 8h time point. SD is plotted as error bars (are only slightly visible). (n=3 for the 1min, 1h and 8h time points and the equilibrium labelled sample. n=1 for the 15s, 10min and 8h time points).

982

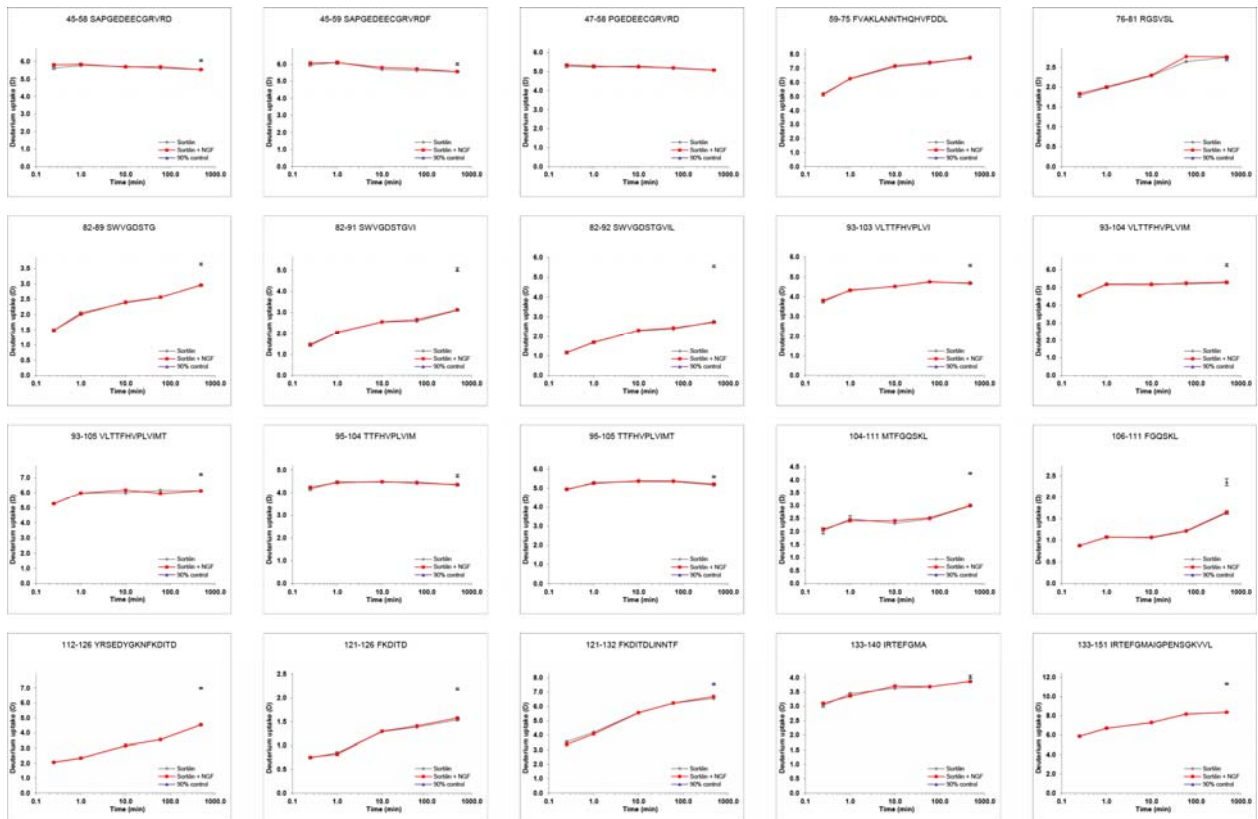

983



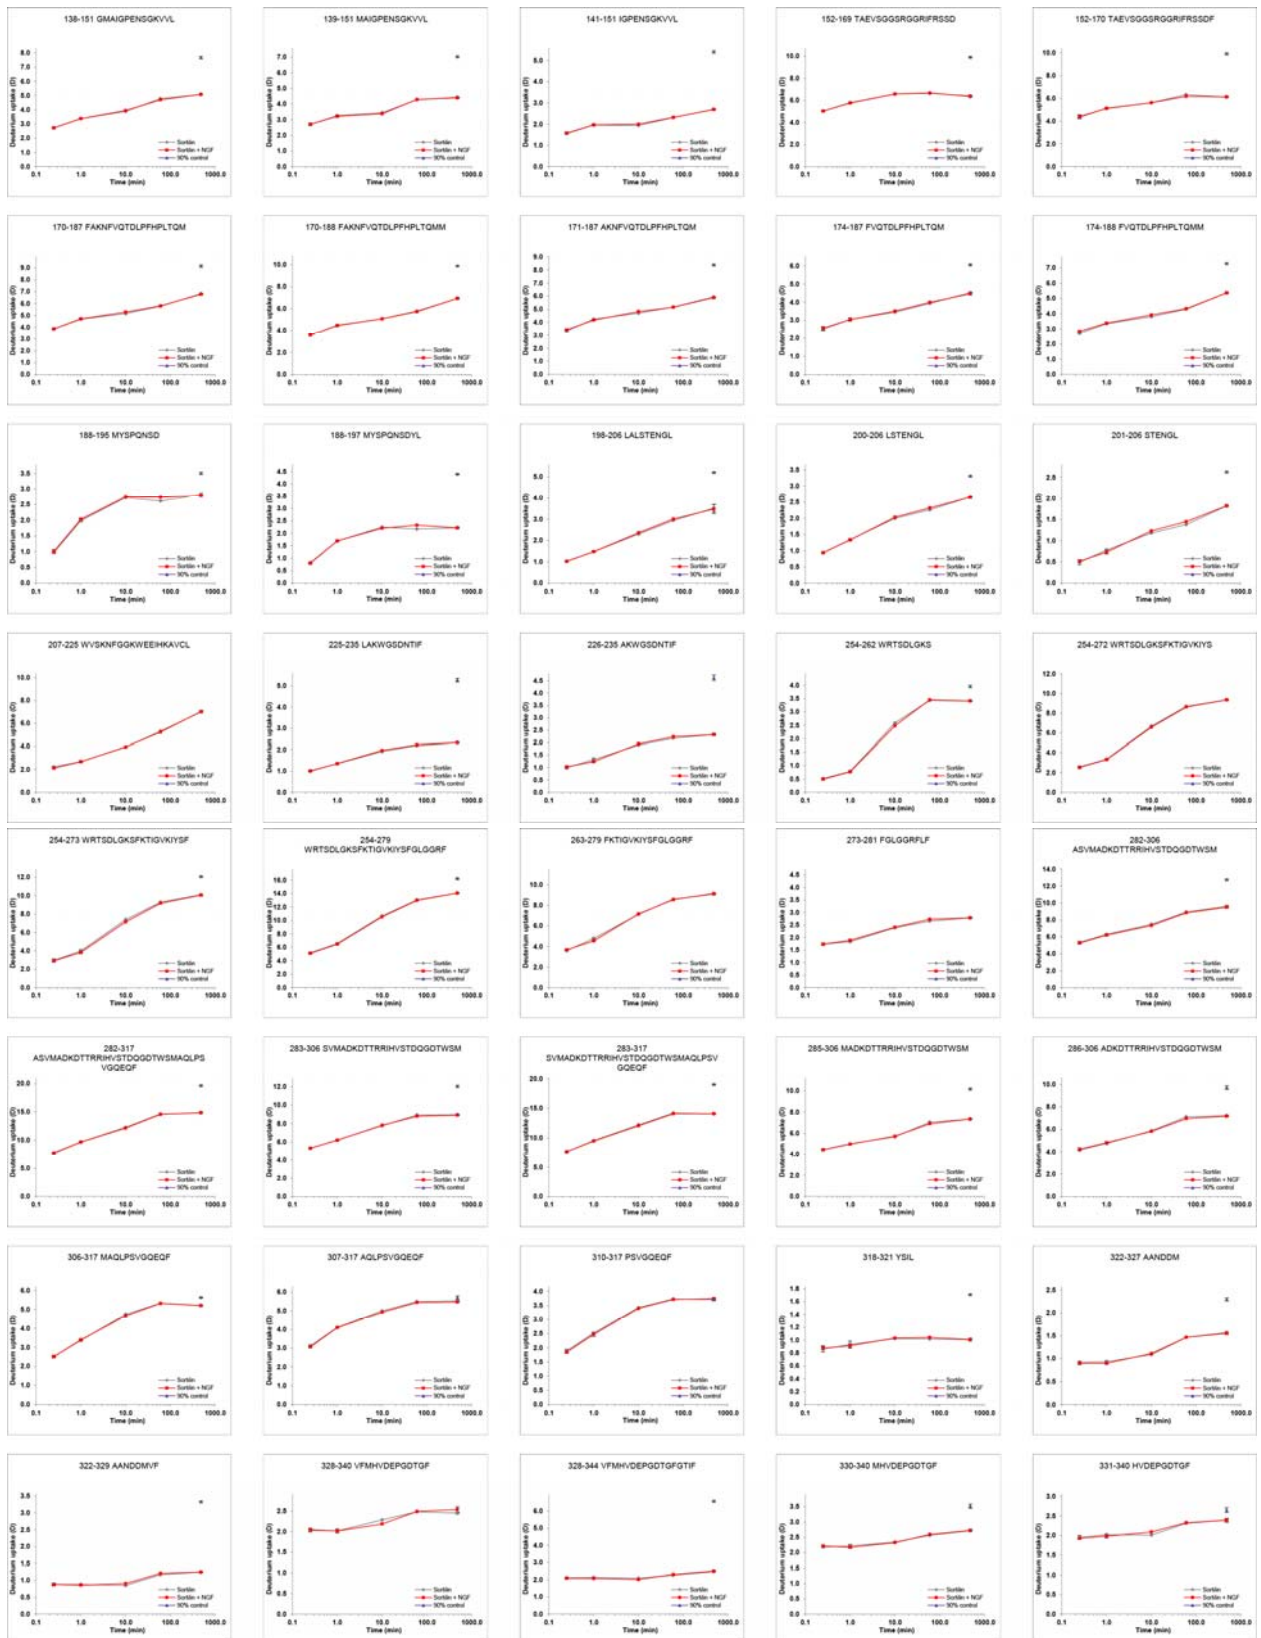

984

985

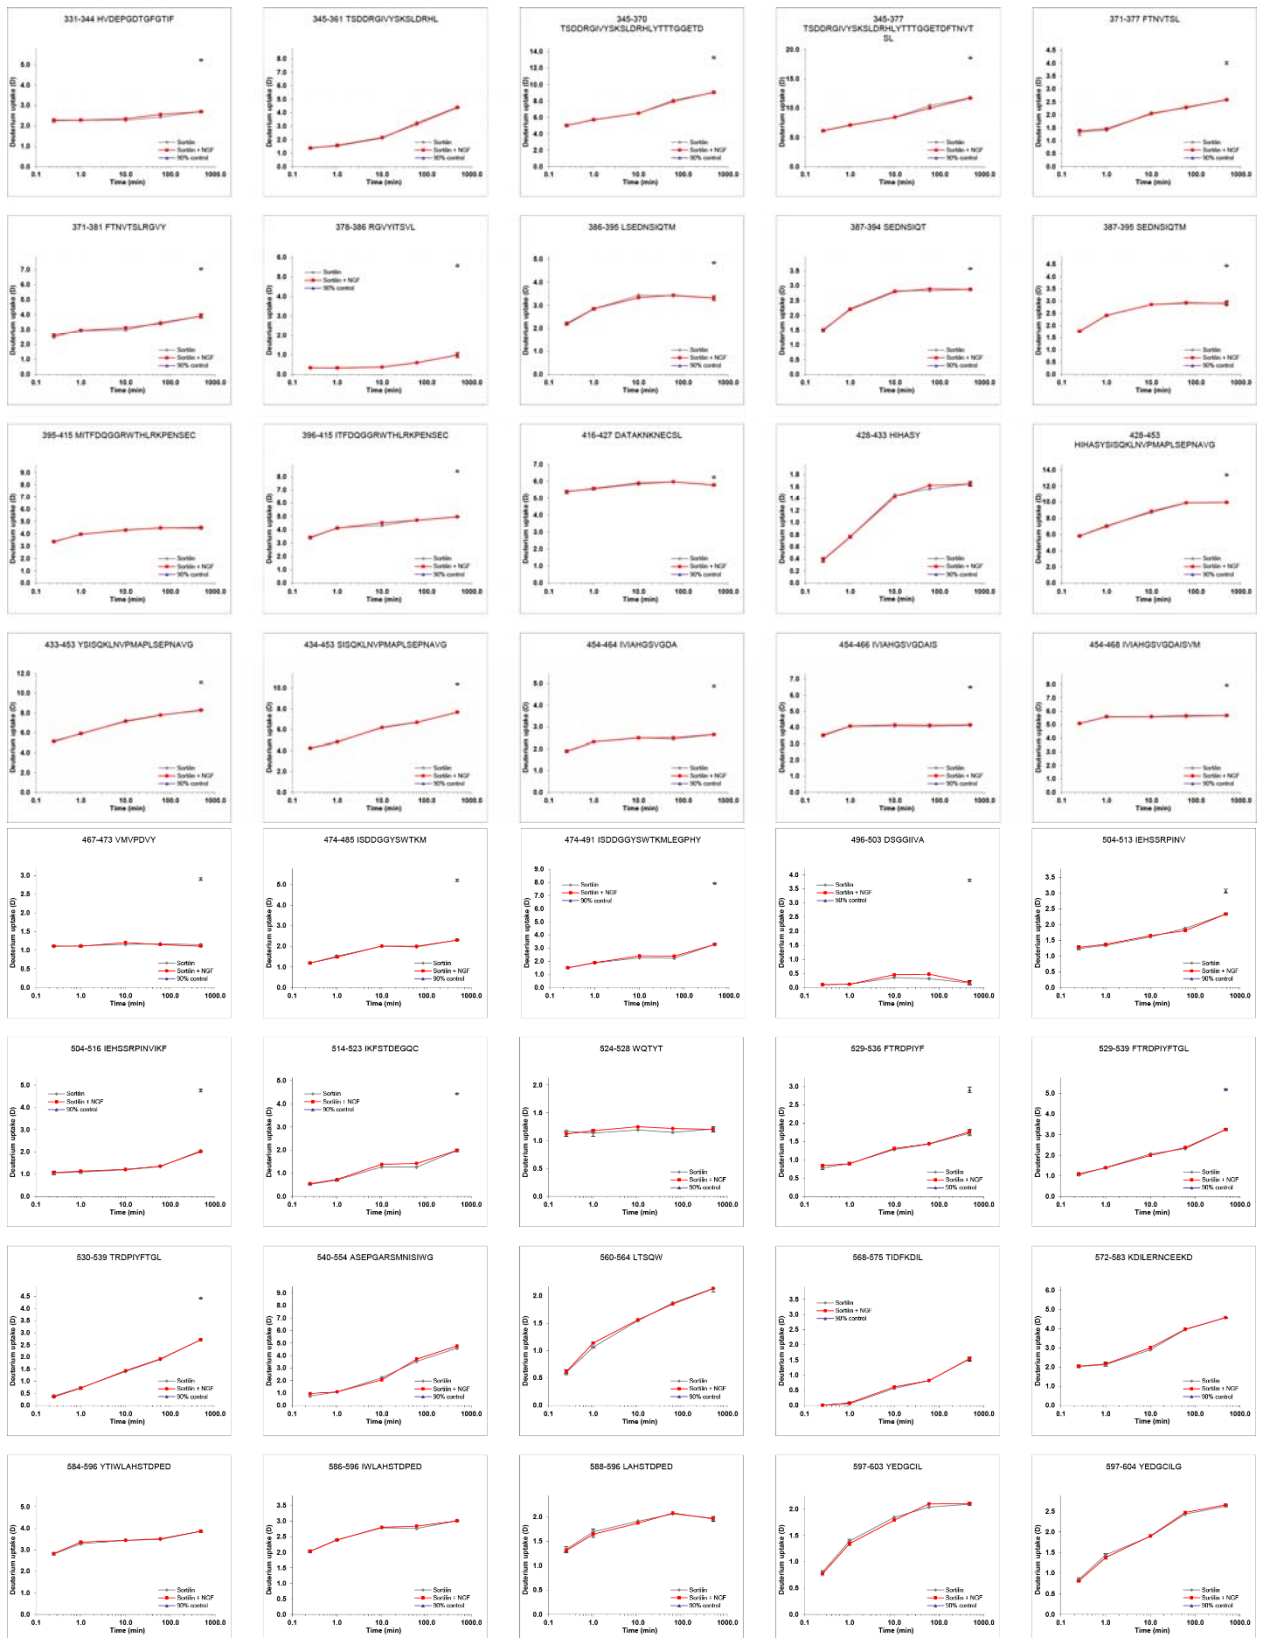

986

987

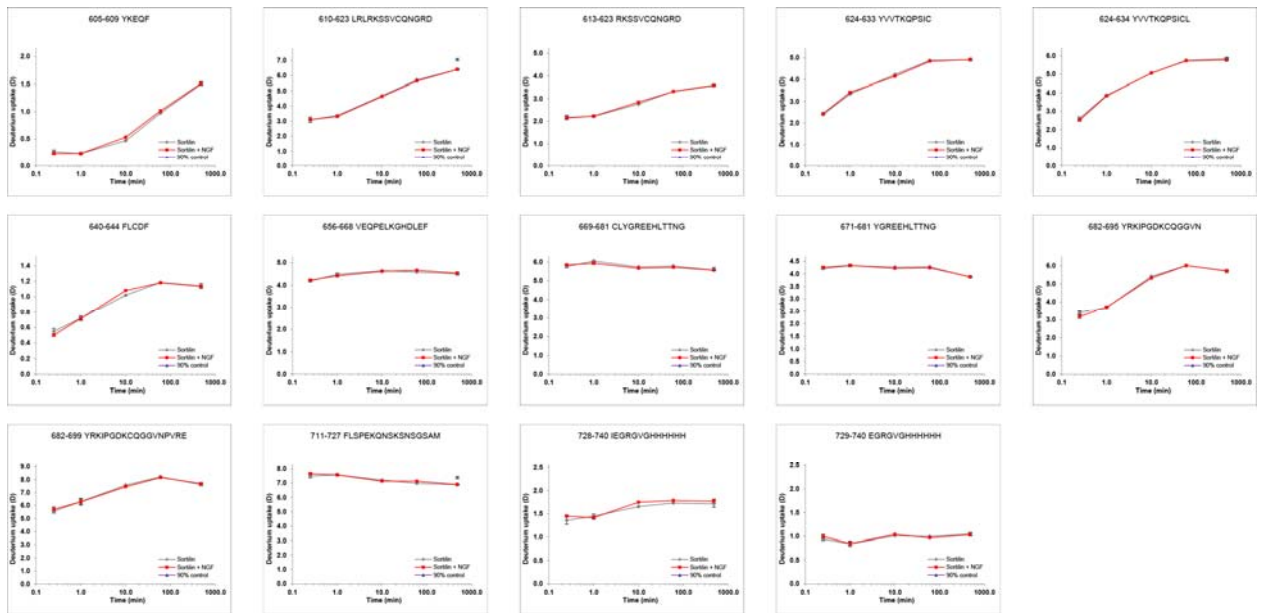

988

989

HDX plots of Sortilin in presence of PGRN. Absolute deuterium incorporation is plotted as a function of time for Sortilin (gray lines) and Sortilin in presence of NGF (red lines). Equilibrium labelled (90%) Sortilin control samples are plotted as filled purple triangles at the 8h time point. SD is plotted as error bars (are only slightly visible). (n=3 for the 15s, 1min and 10min time points and the equilibrium labelled sample. n=1 for the 1h and 8h time points).

990

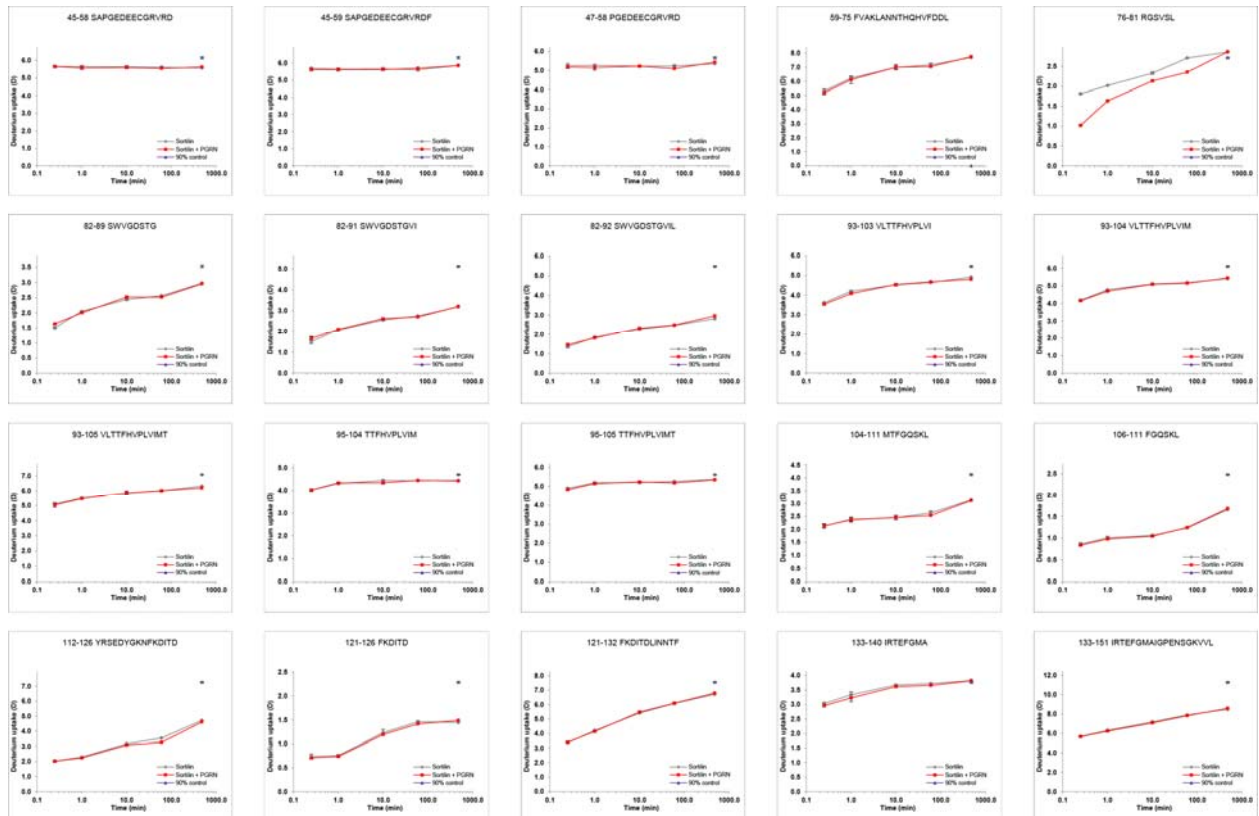

991

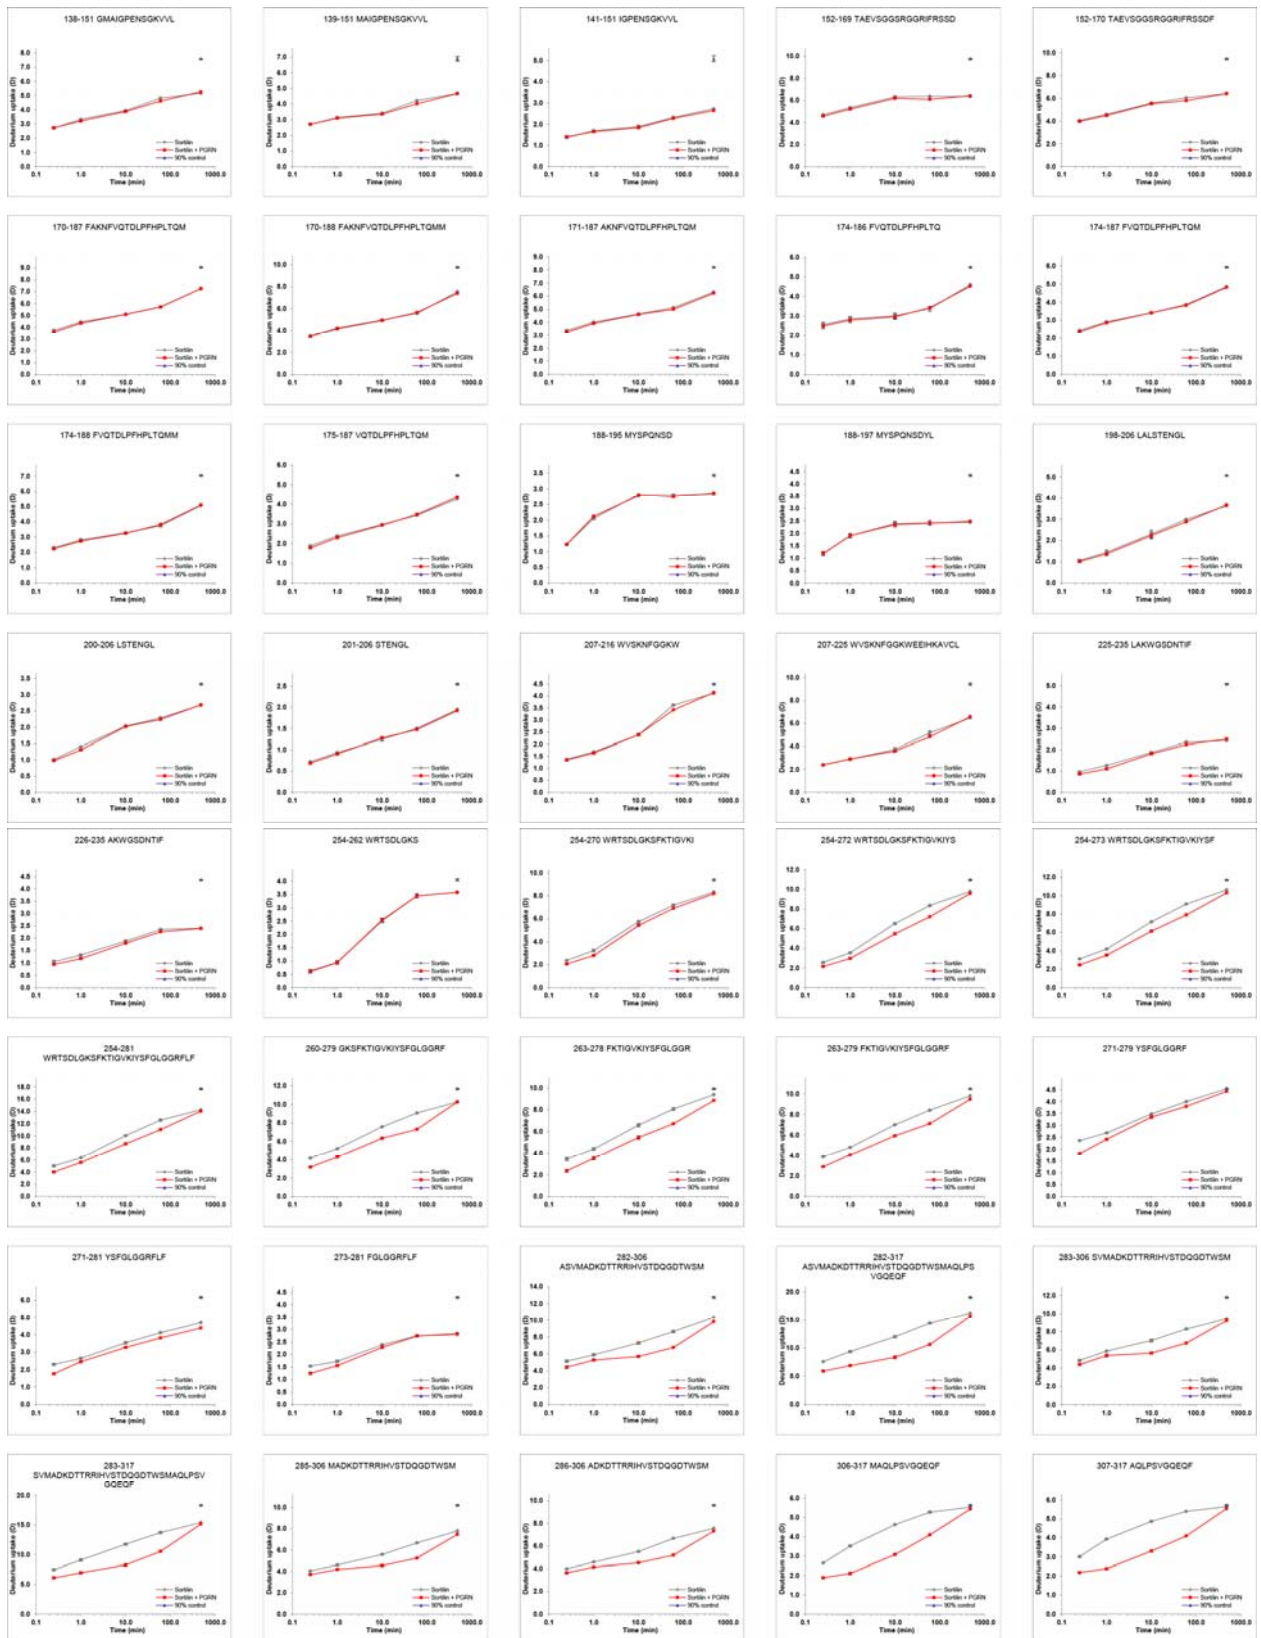

992

993



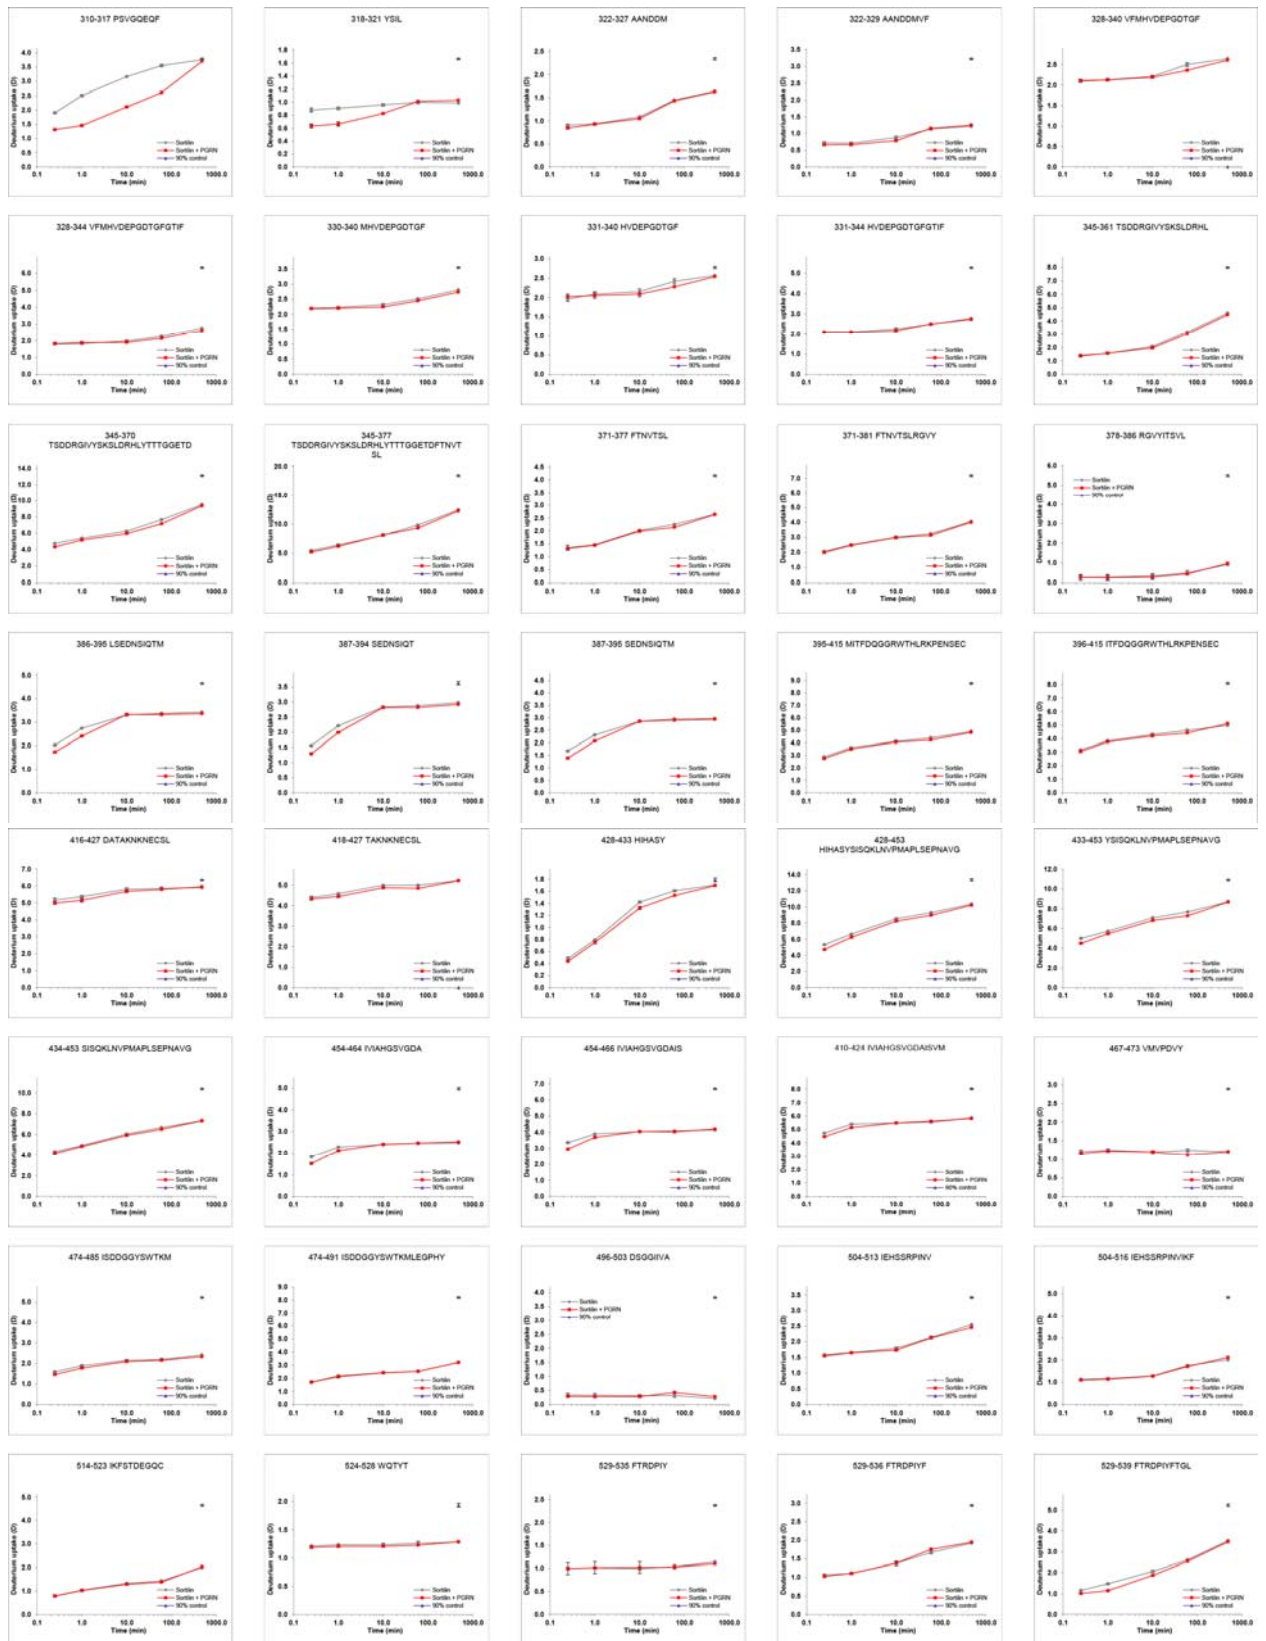

994

995

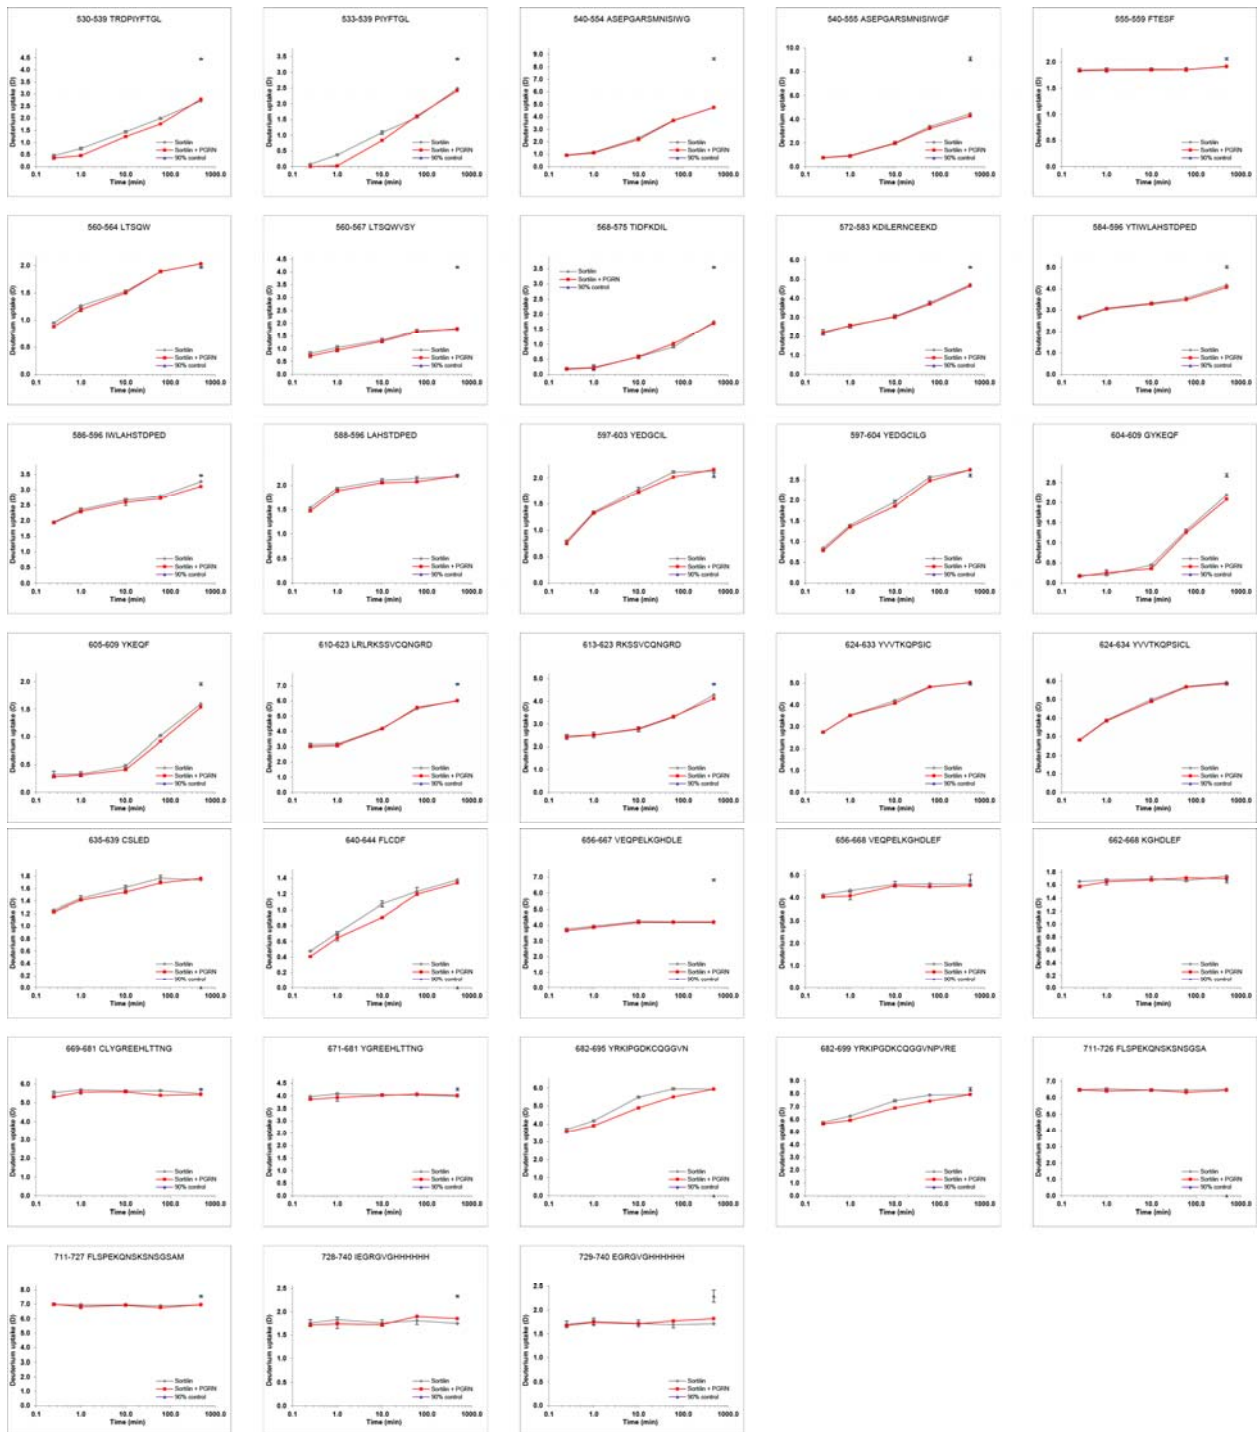

996

997

998

HDX plots of PGRN in presence of Sortilin. Absolute deuterium incorporation is plotted as a function of time for PGRN (gray lines) and PGRN in presence of Sortilin (red lines). Equilibrium labelled (90%) proSort control samples are plotted as filled purple triangles at the 8h time point. SD is plotted as error bars (are only slightly visible). (n=3 for the 15smin and 1min time points. n=1 for the 10min, 1h and 3h time points and the equilibrium labelled sample).

999

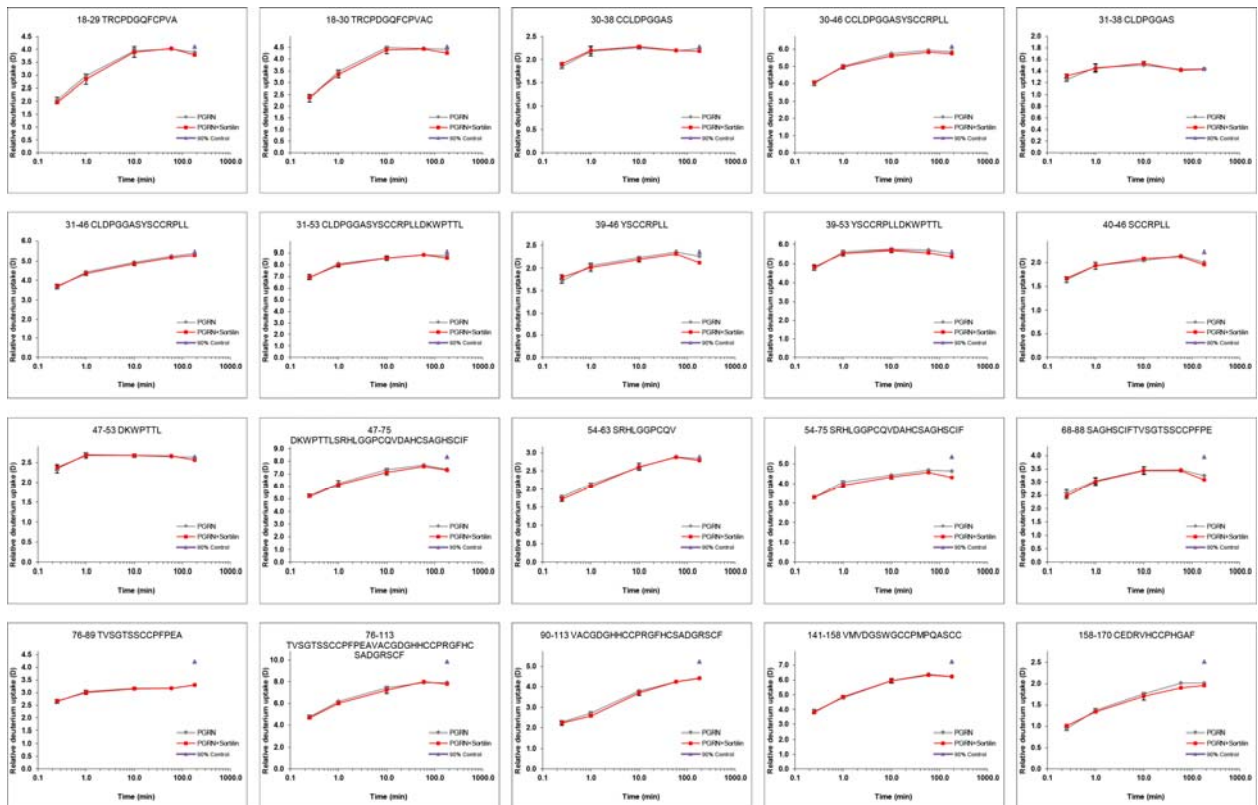

1000

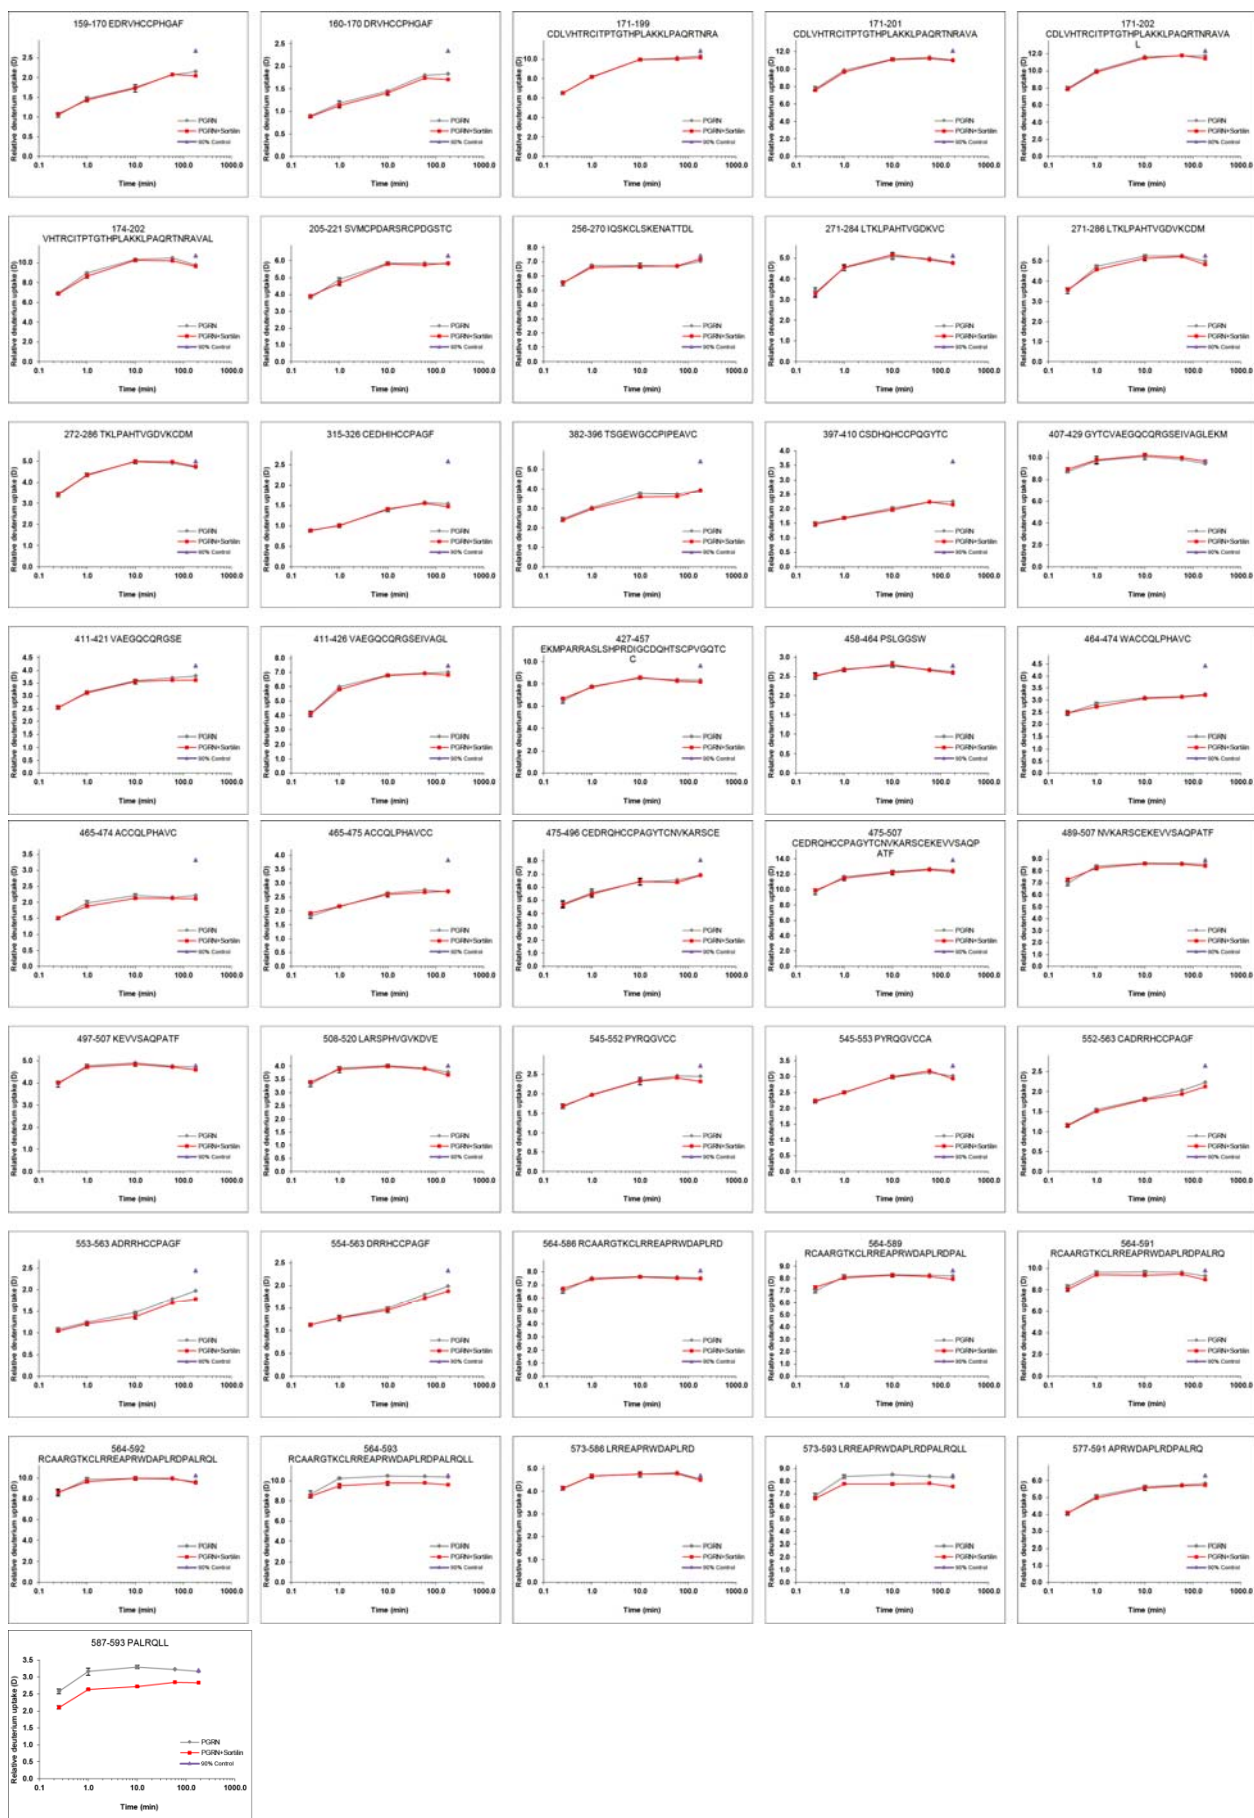

1001

1002

1003
